# Supplementary material for: Functional analysis of Rossmann-like domains reveals convergent evolution of topology and reaction pathways
Source: PLoS Comput Biol. 2019 Dec 23;15(12):e1007569. doi: 10.1371/journal.pcbi.1007569 (PMC6957218; doi:10.1371/journal.pcbi.1007569)
Supplement: S5 Table — (XLSX) [file pcbi.1007569.s017.xlsx]

## Sheet: Sheet1
Name	KEGG ID	Ligand PDB ID	Kingdom	Superclass	Class	Comment
2-propynal	C05985	n/a	Organic compounds	Acetylides	n/a
acetylene	C01548	n/a	Organic compounds	Acetylides	n/a
(-)-pavine	C20771	n/a	Organic compounds	Alkaloids and derivatives	Pavine alkaloids
16-epivellosimine	C11633	EVS	Organic compounds	Alkaloids and derivatives	Macroline alkaloids	Biologically significant ligand;
2-acylglycerol	C02112	n/a	Organic compounds	Alkaloids and derivatives	Protopine alkaloids
codeine	C06174	n/a	Organic compounds	Alkaloids and derivatives	Morphinans
codeine-6-glucuronide	C16577	n/a	Organic compounds	Alkaloids and derivatives	Morphinans
ecgoninemethylester	C12448	n/a	Organic compounds	Alkaloids and derivatives	Tropane alkaloids
irinotecan	C16641	CP0	Organic compounds	Alkaloids and derivatives	Camptothecins
morphine	C01516	n/a	Organic compounds	Alkaloids and derivatives	Morphinans
morphine-3-glucuronide	C16643	n/a	Organic compounds	Alkaloids and derivatives	Morphinans
morphine-6-glucuronide	C16578	n/a	Organic compounds	Alkaloids and derivatives	Morphinans
n-methylpavine	C20770	n/a	Organic compounds	Alkaloids and derivatives	Pavine alkaloids
normorphine	C11785	n/a	Organic compounds	Alkaloids and derivatives	Morphinans
NPC	C16543	n/a	Organic compounds	Alkaloids and derivatives	Camptothecins
polyneuridinealdehyde	C11632	n/a	Organic compounds	Alkaloids and derivatives	Macroline alkaloids
pseudotropine	C02066	PTO	Organic compounds	Alkaloids and derivatives	Tropane alkaloids	Biologically significant ligand;
SN-38	C11173	n/a	Organic compounds	Alkaloids and derivatives	Camptothecins
sn38glucuronide	C11376	n/a	Organic compounds	Alkaloids and derivatives	Camptothecins
tropine	C00729	n/a	Organic compounds	Alkaloids and derivatives	Tropane alkaloids
tropinone	C00783	TNE	Organic compounds	Alkaloids and derivatives	Tropane alkaloids	Biologically significant ligand;
(1aalpha,2beta,3alpha,11calpha)-1a,2,3,11c-tetrahydro-6,11-dimethylbenzo[6,7]phenanthro[3,4-b]oxirene-2,3-diol	C19559	n/a	Organic compounds	Benzenoids	Phenanthrenes and derivatives
(1r,2s)-naphthalene1,2-oxide	C14786	n/a	Organic compounds	Benzenoids	Naphthalenes
(1s,2r)-naphthalene1,2-oxide	C14787	n/a	Organic compounds	Benzenoids	Naphthalenes
(2-naphthyl)methanol	C02909	2NA	Organic compounds	Benzenoids	Naphthalenes
(3s)-2-oxo-3-phenylbutanoate	C20646	n/a	Organic compounds	Benzenoids	Benzene and substituted derivatives
(r)-mandelonitrile	C00561	n/a	Organic compounds	Benzenoids	Benzene and substituted derivatives
(s)-1-phenylethanol	C11348	n/a	Organic compounds	Benzenoids	Benzene and substituted derivatives
(s)-2-phenyloxirane	C20782	RSO	Organic compounds	Benzenoids	Benzene and substituted derivatives
(s)-4-hydroxymandelonitrile	C03742	n/a	Organic compounds	Benzenoids	Phenols
[dihydrolipoyllysine-residueacetyltransferase]s-acetyldihydrolipoyllysine	C16255	n/a	Organic compounds	Benzenoids	Fluorenes
[dihydrolipoyllysine-residuesuccinyltransferase]s-succinyldihydrolipoyllysine	C16254	n/a	Organic compounds	Benzenoids	Fluorenes
1-(4-methoxyphenyl)-n-methyl-n-[(3-methyloxetan-3-yl)methyl]methanamine	C21775	n/a	Organic compounds	Benzenoids	n/a
1,2,3,5-tetrahydroxybenzene	C03743	n/a	Organic compounds	Benzenoids	Phenols
1,2,3-trihydroxybenzene	C01108	PYG	Organic compounds	Benzenoids	Phenols	Biologically significant ligand;
1,2-dihydronaphthalene-1,2-diol	C06205	n/a	Organic compounds	Benzenoids	Naphthalenes
1,3,5-trihydroxybenzene	C02183	13X	Organic compounds	Benzenoids	Phenols
1,3,6,8-tetrahydroxynaphthalene	C04033	n/a	Organic compounds	Benzenoids	Naphthalenes
1,3,8-naphthalenertriol	C01173	n/a	Organic compounds	Benzenoids	Naphthalenes
1a,11b-dihydro-4,9-dimethylbenz[a]anthra[3,4-b]oxirene	C19489	n/a	Organic compounds	Benzenoids	Phenanthrenes and derivatives
1-hydroxy-2-naphthoate	C03203	n/a	Organic compounds	Benzenoids	Naphthalenes
1-hydroxymethylnaphthalene	C14089	n/a	Organic compounds	Benzenoids	Naphthalenes
1-naphthaldehyde	C14090	n/a	Organic compounds	Benzenoids	Naphthalenes
1-nitro-5,6-dihydroxy-dihydronaphthalene	C14801	n/a	Organic compounds	Benzenoids	Naphthalenes
1-nitronaphthalene	C14040	n/a	Organic compounds	Benzenoids	Naphthalenes
1-nitronaphthalene-5,6-oxide	C14800	n/a	Organic compounds	Benzenoids	Naphthalenes
1-nitronaphthalene-7,8-oxide	C14802	n/a	Organic compounds	Benzenoids	Naphthalenes
2-({[(4-methoxyphenyl)methyl](methyl)amino}methyl)-2-methylpropane-1,3-diol	C21776	n/a	Organic compounds	Benzenoids	n/a
2,3-dihydroxy-4'-chlorobiphenyl	C06586	n/a	Organic compounds	Benzenoids	Benzene and substituted derivatives
2,3-dihydroxybenzoate	C00196	DBH	Organic compounds	Benzenoids	Benzene and substituted derivatives
2,3-dihydroxytoluene	C02923	n/a	Organic compounds	Benzenoids	Phenols
2,3-eneacid	C11823	n/a	Organic compounds	Benzenoids	Benzene and substituted derivatives
2,4-diamino-6-hydroxylaminotoluene	C16399	n/a	Organic compounds	Benzenoids	N-phenylhydroxylamines
2,4-diamino-6-nitrotoluene	C16396	n/a	Organic compounds	Benzenoids	Benzene and substituted derivatives
2,6-dimethylaniline	C11004	n/a	Organic compounds	Benzenoids	Benzene and substituted derivatives
2,7-dihydroxy-5-methyl-1-naphthoate	C20857	n/a	Organic compounds	Benzenoids	Naphthalenes
2-aminophenol	C01987	2AF	Organic compounds	Benzenoids	Benzene and substituted derivatives
2-hydroxy-7-methoxy-5-methyl-1-naphthoate	C20841	7NA	Organic compounds	Benzenoids	Naphthalenes	Biologically significant ligand;
2-hydroxybiphenyl	C02499	n/a	Organic compounds	Benzenoids	Benzene and substituted derivatives
2'-hydroxybiphenyl-2-sulfinate	C06742	OBP	Organic compounds	Benzenoids	Benzene and substituted derivatives	Biologically significant ligand;
2-naphthaldehyde	C14099	n/a	Organic compounds	Benzenoids	Naphthalenes
2-phenyl-1,3-propanediolmonocarbamate	C16586	n/a	Organic compounds	Benzenoids	Benzene and substituted derivatives
2-phenylacetamide	C02505	n/a	Organic compounds	Benzenoids	Benzene and substituted derivatives
3-(3,4-dihydroxyphenyl)pyruvate	C04045	n/a	Organic compounds	Benzenoids	Benzene and substituted derivatives
3-(4-hydroxyphenyl)pyruvate	C01179	ENO	Organic compounds	Benzenoids	Benzene and substituted derivatives	Biologically significant ligand;
3,4-dihydroxybenzoate	C00230	DHB	Organic compounds	Benzenoids	Benzene and substituted derivatives	Biologically significant ligand;
3,4-dihydroxymandelaldehyde	C05577	n/a	Organic compounds	Benzenoids	Benzene and substituted derivatives
3,4-dihydroxymandelate	C05580	n/a	Organic compounds	Benzenoids	Phenols
3,4-dihydroxyphenylacetaldehyde	C04043	n/a	Organic compounds	Benzenoids	Benzene and substituted derivatives
3,4-dihydroxyphenylacetate	C01161	n/a	Organic compounds	Benzenoids	Phenols
3,4-dihydroxyphenylethyleneglycol	C05576	n/a	Organic compounds	Benzenoids	Phenols
3-[(1-carboxyvinyl)oxy]benzoate	C20772	n/a	Organic compounds	Benzenoids	Benzene and substituted derivatives
3-amino-5-hydroxybenzoate	C12107	n/a	Organic compounds	Benzenoids	Benzene and substituted derivatives
3-carbamoyl-2-phenylpropionaldehyde	C16587	n/a	Organic compounds	Benzenoids	Benzene and substituted derivatives
3-carbamoyl-2-phenylpropionicacid	C16591	n/a	Organic compounds	Benzenoids	Benzene and substituted derivatives
3-cresol	C01467	n/a	Organic compounds	Benzenoids	Phenols
3-hydroxyanthranilate	C00632	n/a	Organic compounds	Benzenoids	Benzene and substituted derivatives
3-hydroxybenzoate	C00587	3HB	Organic compounds	Benzenoids	Benzene and substituted derivatives	Biologically significant ligand;
3-methoxy-4-hydroxymandelate	C05584	n/a	Organic compounds	Benzenoids	Phenols
3-methoxy-4-hydroxyphenylacetaldehyde	C05581	n/a	Organic compounds	Benzenoids	Phenols
3-methoxy-4-hydroxyphenylethyleneglycol	C05594	n/a	Organic compounds	Benzenoids	Phenols
3-methoxy-4-hydroxyphenylglycolaldehyde	C05583	n/a	Organic compounds	Benzenoids	Phenols
3-methoxytyramine	C05587	n/a	Organic compounds	Benzenoids	Phenols
3-methylsalicylate	C14088	n/a	Organic compounds	Benzenoids	Benzene and substituted derivatives
3-o-methylgallate	C05616	n/a	Organic compounds	Benzenoids	Benzene and substituted derivatives
3-oxo-5alpha-steroid	C02940	n/a	Organic compounds	Benzenoids	Phenols
3-oxo-delta1-steroid	C02941	n/a	Organic compounds	Benzenoids	Benzene and substituted derivatives
4-chlorobenzoate	C02370	174	Organic compounds	Benzenoids	Benzene and substituted derivatives	Biologically significant ligand;
4-cresol	C01468	PCR	Organic compounds	Benzenoids	Phenols
4-fluorobenzoate	C02371	n/a	Organic compounds	Benzenoids	Benzene and substituted derivatives
4-hydroxy-5-phenyltetrahydro-1,3-oxazin-2-one	C16595	n/a	Organic compounds	Benzenoids	Benzene and substituted derivatives
4-hydroxybenzoate	C00156	PHB	Organic compounds	Benzenoids	Benzene and substituted derivatives	Biologically significant ligand;
4-hydroxymethylcatechol	C14110	n/a	Organic compounds	Benzenoids	Phenols
4-hydroxymethylsalicylate	C14109	n/a	Organic compounds	Benzenoids	Benzene and substituted derivatives
4-hydroxyphenylacetaldehyde	C03765	n/a	Organic compounds	Benzenoids	Benzene and substituted derivatives
4-hydroxyphenylacetate	C13636	n/a	Organic compounds	Benzenoids	Phenol esters
4-hydroxyphenylacetate	C00642	n/a	Organic compounds	Benzenoids	Phenols
4-hydroxyphenylglyoxylate	C03590	n/a	Organic compounds	Benzenoids	Benzene and substituted derivatives
4-methylcatechol	C06730	MCT	Organic compounds	Benzenoids	Phenols
4-methylsalicylate	C14103	n/a	Organic compounds	Benzenoids	Benzene and substituted derivatives
4-nitrophenol	C00870	NPO	Organic compounds	Benzenoids	Phenols	Biologically significant ligand;
5'-(n7-methyl5'-triphosphoguanosine)-(2'-o-methyl-purine-ribonucleotide)-[mrna]	C04802	n/a	Organic compounds	Benzenoids	Benzene and substituted derivatives
5-hydroxyconiferaldehyde	C12204	n/a	Organic compounds	Benzenoids	Phenols
5-hydroxyconiferylalcohol	C12205	n/a	Organic compounds	Benzenoids	Phenols
5-nitroanthranilate	C19788	6R6	Organic compounds	Benzenoids	Benzene and substituted derivatives	Biologically significant ligand;
5-nitrosalicylate	C19789	6R7	Organic compounds	Benzenoids	Benzene and substituted derivatives	Biologically significant ligand;
5-phenyl-1,3-oxazinane-2,4-dione	C16596	n/a	Organic compounds	Benzenoids	Benzene and substituted derivatives
5'-ribonucleotide	C02520	n/a	Organic compounds	Benzenoids	Benzene and substituted derivatives
7,12-dimethylbenz[a]anthracene	C19488	n/a	Organic compounds	Benzenoids	Phenanthrenes and derivatives
7-hydroxymethyl-12-methylbenz[a]anthracene	C19561	n/a	Organic compounds	Benzenoids	Phenanthrenes and derivatives
7-hydroxymethyl-12-methylbenz[a]anthracenesulfate	C19562	n/a	Organic compounds	Benzenoids	Phenanthrenes and derivatives
9-hydroxybenzo[a]pyrene	C14556	n/a	Organic compounds	Benzenoids	Pyrenes
9-hydroxybenzo[a]pyrene-4,5-oxide	C14854	n/a	Organic compounds	Benzenoids	Phenanthrenes and derivatives
aklavinone	C12424	VAK	Organic compounds	Benzenoids	Naphthacenes	Biologically significant ligand;
alpha-d-glucosylglycogenin	C02687	n/a	Organic compounds	Benzenoids	Benzene and substituted derivatives
aniline	C00292	ANL	Organic compounds	Benzenoids	Benzene and substituted derivatives
anthocyanidin	C02003	n/a	Organic compounds	Benzenoids	Benzene and substituted derivatives
anthranilate	C00108	BE2	Organic compounds	Benzenoids	Benzene and substituted derivatives	Biologically significant ligand;
aromaticaldehyde	C00193	n/a	Organic compounds	Benzenoids	Benzene and substituted derivatives
aromaticprimaryalcohol	C03485	n/a	Organic compounds	Benzenoids	Benzene and substituted derivatives
benzaldehyde	C00261	HBX	Organic compounds	Benzenoids	Benzene and substituted derivatives	Biologically significant ligand;
benzamide	C09815	UNU	Organic compounds	Benzenoids	Benzene and substituted derivatives	Biologically significant ligand;
benzo[a]pyrene	C07535	n/a	Organic compounds	Benzenoids	Pyrenes
benzo[a]pyrene-4,5-oxide	C14851	n/a	Organic compounds	Benzenoids	Phenanthrenes and derivatives
benzo[a]pyrene-7,8-dihydrodiol-9,10-oxide	C14853	n/a	Organic compounds	Benzenoids	Pyrenes
benzo[a]pyrene-7,8-diol	C14852	n/a	Organic compounds	Benzenoids	Pyrenes
benzo[a]pyrene-7,8-oxide	C14850	n/a	Organic compounds	Benzenoids	Pyrenes
benzo[a]pyrene-9,10-oxide	C14849	n/a	Organic compounds	Benzenoids	Pyrenes
benzoate	C00180	BEZ	Organic compounds	Benzenoids	Benzene and substituted derivatives	Biologically significant ligand;
benzylacetate	C15513	n/a	Organic compounds	Benzenoids	Benzene and substituted derivatives
biphenyl-2,3-diol	C02526	BPY	Organic compounds	Benzenoids	Benzene and substituted derivatives	Biologically significant ligand;
catechol	C15571	n/a	Organic compounds	Benzenoids	Phenols
catechol	C00090	n/a	Organic compounds	Benzenoids	Phenols
chavicol	C16930	n/a	Organic compounds	Benzenoids	Phenols
cholesterolester	C02530	n/a	Organic compounds	Benzenoids	Benzene and substituted derivatives
cis-2,3-dihydro-2,3-dihydroxy-4'-chlorobiphenyl	C06585	n/a	Organic compounds	Benzenoids	Benzene and substituted derivatives
cis-2,3-dihydro-2,3-dihydroxybiphenyl	C06589	n/a	Organic compounds	Benzenoids	Benzene and substituted derivatives
citalopram	C07572	n/a	Organic compounds	Benzenoids	Benzene and substituted derivatives
citalopramn-oxide	C16607	n/a	Organic compounds	Benzenoids	Benzene and substituted derivatives
cocaine	C01416	n/a	Organic compounds	Benzenoids	Benzene and substituted derivatives
coniferylacetate	C20225	n/a	Organic compounds	Benzenoids	Phenols
coniferylalcohol	C00590	N7I	Organic compounds	Benzenoids	Phenols
coniferylaldehyde	C02666	CIY	Organic compounds	Benzenoids	Phenols
coniferylester	C20224	n/a	Organic compounds	Benzenoids	Phenols
coumarylacetate	C20465	n/a	Organic compounds	Benzenoids	Benzene and substituted derivatives
demethylcitalopram	C16608	n/a	Organic compounds	Benzenoids	Benzene and substituted derivatives
didemethylcitalopram	C16609	n/a	Organic compounds	Benzenoids	Benzene and substituted derivatives
dopamine	C03758	LDP	Organic compounds	Benzenoids	Phenols
epsilon-rhodomycinone	C12425	n/a	Organic compounds	Benzenoids	Naphthacenes
estragole	C10452	n/a	Organic compounds	Benzenoids	Phenol ethers
eugenol	C10453	n/a	Organic compounds	Benzenoids	Phenols
fattyacidanion	C02403	n/a	Organic compounds	Benzenoids	Naphthalenes
gallate	C01424	GDE	Organic compounds	Benzenoids	Benzene and substituted derivatives	Biologically significant ligand;
guaiacol	C15572	n/a	Organic compounds	Benzenoids	Phenols
homovanillate	C05582	n/a	Organic compounds	Benzenoids	Phenols
isoeugenol	C10469	EUG	Organic compounds	Benzenoids	Phenols	Biologically significant ligand;
isomethyleugenol	C10478	n/a	Organic compounds	Benzenoids	Benzene and substituted derivatives
l-adrenaline	C00788	n/a	Organic compounds	Benzenoids	Phenols
lidocaine	C07073	LQZ	Organic compounds	Benzenoids	Benzene and substituted derivatives
l-metanephrine	C05588	n/a	Organic compounds	Benzenoids	Phenols
l-noradrenaline	C00547	LNR	Organic compounds	Benzenoids	Phenols	Biologically significant ligand;
l-normetanephrine	C05589	n/a	Organic compounds	Benzenoids	Phenols
methyleugenol	C10454	n/a	Organic compounds	Benzenoids	Benzene and substituted derivatives
methylsalicylate	C12305	n/a	Organic compounds	Benzenoids	Benzene and substituted derivatives
n,n-dimethylanilinen-oxide	C01183	n/a	Organic compounds	Benzenoids	Benzene and substituted derivatives
n-acetylanthranilate	C06332	ZZ8	Organic compounds	Benzenoids	Benzene and substituted derivatives	Biologically significant ligand;
naphthalene	C00829	n/a	Organic compounds	Benzenoids	Naphthalenes
naphthalene-1,2-diol	C03012	n/a	Organic compounds	Benzenoids	Naphthalenes
n-carbamoyl-l-2-aminoacid	C11529	n/a	Organic compounds	Benzenoids	Benzene and substituted derivatives
n-formylanthranilate	C05653	n/a	Organic compounds	Benzenoids	Benzene and substituted derivatives
norsolorinicacidanthrone	C20453	n/a	Organic compounds	Benzenoids	Anthracenes
o-methoxyphenol	C01502	n/a	Organic compounds	Benzenoids	Phenols
oxidizedrenillaluciferin	C03717	n/a	Organic compounds	Benzenoids	Benzene and substituted derivatives
paraoxon	C06606	n/a	Organic compounds	Benzenoids	Benzene and substituted derivatives
peptidylproline(omega	C03798	n/a	Organic compounds	Benzenoids	Benzene and substituted derivatives
phenethylamine	C05332	n/a	Organic compounds	Benzenoids	Benzene and substituted derivatives
phenol	C15584	n/a	Organic compounds	Benzenoids	Phenols
phenol	C00146	IPH	Organic compounds	Benzenoids	Phenols	Biologically significant ligand;
phenylacetaldehyde	C00601	n/a	Organic compounds	Benzenoids	Benzene and substituted derivatives
phenylacetate	C15583	n/a	Organic compounds	Benzenoids	Phenol esters
phenylacetate	C00548	QY9	Organic compounds	Benzenoids	Phenol esters
phenylaceticacid	C07086	PAC	Organic compounds	Benzenoids	Benzene and substituted derivatives	Biologically significant ligand;
phenylacetone	C15512	n/a	Organic compounds	Benzenoids	Benzene and substituted derivatives
phenylglyoxylate	C02137	173	Organic compounds	Benzenoids	Benzene and substituted derivatives
phenylpyruvate	C00166	PPY	Organic compounds	Benzenoids	Benzene and substituted derivatives	Biologically significant ligand;
quinol	C00530	n/a	Organic compounds	Benzenoids	Phenols
r-s-cysteinylglycine	C05729	n/a	Organic compounds	Benzenoids	Benzene and substituted derivatives
salicylate	C00805	n/a	Organic compounds	Benzenoids	Benzene and substituted derivatives
salutaridine	C05179	n/a	Organic compounds	Benzenoids	Phenanthrenes and derivatives
salutaridinol	C05220	n/a	Organic compounds	Benzenoids	Phenanthrenes and derivatives
scytalone	C00779	n/a	Organic compounds	Benzenoids	Tetralins
sinapoylaldehyde	C05610	SNY	Organic compounds	Benzenoids	Phenols
sinapylalcohol	C02325	55B	Organic compounds	Benzenoids	Phenols
styrene	C07083	n/a	Organic compounds	Benzenoids	Benzene and substituted derivatives
thyminedimer	C17509	n/a	Organic compounds	Benzenoids	Benzene and substituted derivatives
trans-3,4-dihydro-3,4-dihydroxy-7,12-dimethylbenz[a]anthracene	C19490	n/a	Organic compounds	Benzenoids	Phenanthrenes and derivatives
trans-5,6-dihydro-5,6-dihydroxy-7,12-dimethylbenz[a]anthracene	C19607	n/a	Organic compounds	Benzenoids	Phenanthrenes and derivatives
twothymineresidues(indna)	C17510	n/a	Organic compounds	Benzenoids	Benzene and substituted derivatives
tyramine	C00483	AEF	Organic compounds	Benzenoids	Benzene and substituted derivatives
ubiquinol	C00390	n/a	Organic compounds	Benzenoids	Phenols
vermelone	C01624	n/a	Organic compounds	Benzenoids	Tetralins
ethylene	C06547	n/a	Organic compounds	Hydrocarbons	Unsaturated hydrocarbons
methane	C01438	n/a	Organic compounds	Hydrocarbons	Saturated hydrocarbons
(-)-lariciresinol	C20454	n/a	Organic compounds	Lignans, neolignans and related compounds	Furanoid lignans
(-)-pinoresinol	C20455	n/a	Organic compounds	Lignans, neolignans and related compounds	Furanoid lignans
()-secoisolariciresinol	C20456	n/a	Organic compounds	Lignans, neolignans and related compounds	Dibenzylbutane lignans
matairesinol	C10682	MAX	Organic compounds	Lignans, neolignans and related compounds	Furanoid lignans	Biologically significant ligand;
secoisolariciresinol	C18167	n/a	Organic compounds	Lignans, neolignans and related compounds	Dibenzylbutane lignans
()-(s)-carvone	C11383	n/a	Organic compounds	Lipids and lipid-like molecules	Prenol lipids
()-cis-isopulegone	C11951	n/a	Organic compounds	Lipids and lipid-like molecules	Prenol lipids
(-)-isopiperitenone	C02485	IT9	Organic compounds	Lipids and lipid-like molecules	Prenol lipids	Biologically significant ligand;
(-)-menthone	C00843	n/a	Organic compounds	Lipids and lipid-like molecules	Prenol lipids
()-neomenthol	C00553	n/a	Organic compounds	Lipids and lipid-like molecules	Prenol lipids
()-trans-carveol	C11409	n/a	Organic compounds	Lipids and lipid-like molecules	Prenol lipids
(13e)-11alpha-hydroxy-9,15-dioxoprost-13-enoate	C04654	n/a	Organic compounds	Lipids and lipid-like molecules	Fatty Acyls
(25r)-3alpha,7alpha,12alpha-trihydroxy-5beta-cholestan-26-oyl-coa	C15613	n/a	Organic compounds	Lipids and lipid-like molecules	Fatty Acyls
(25r)-3alpha,7alpha-dihydroxy-5beta-cholestanoyl-coa	C17345	n/a	Organic compounds	Lipids and lipid-like molecules	Fatty Acyls
(25s)-3alpha,7alpha,12alpha-trihydroxy-5beta-cholestan-26-oyl-coa	C17343	n/a	Organic compounds	Lipids and lipid-like molecules	Fatty Acyls
(25s)-3alpha,7alpha-dihydroxy-5beta-cholestanoyl-coa	C17346	n/a	Organic compounds	Lipids and lipid-like molecules	Fatty Acyls
(2e)-5-methylhexa-2,4-dienoyl-coa	C16468	n/a	Organic compounds	Lipids and lipid-like molecules	Fatty Acyls
(2e)-octadecenoyl-coa	C16218	n/a	Organic compounds	Lipids and lipid-like molecules	Fatty Acyls
(2e,6e)-farnesyldiphosphate	C00448	FPP	Organic compounds	Lipids and lipid-like molecules	Prenol lipids	Biologically significant ligand;
(2r)-2,3-dihydroxy-3-methylbutanoate	C04272	n/a	Organic compounds	Lipids and lipid-like molecules	Fatty Acyls
(2r)-2-methylacyl-coa	C05329	n/a	Organic compounds	Lipids and lipid-like molecules	Fatty Acyls
(2r,3r)-dihydroflavonol	C21417	n/a	Organic compounds	Lipids and lipid-like molecules	Fatty Acyls
(2r,3s)-3-isopropylmalate	C04411	IPM	Organic compounds	Lipids and lipid-like molecules	Fatty Acyls	Biologically significant ligand;
(2s)-2-methylacyl-coa	C05232	n/a	Organic compounds	Lipids and lipid-like molecules	Fatty Acyls
(2s)-ethylmalonyl-coa	C18026	n/a	Organic compounds	Lipids and lipid-like molecules	Fatty Acyls
(2s,3s)-3-hydroxy-2-methylbutanoyl-coa	C04405	n/a	Organic compounds	Lipids and lipid-like molecules	Fatty Acyls
(2z,4z)-2-hydroxyhexa-2,4-dienoate	C20240	n/a	Organic compounds	Lipids and lipid-like molecules	Fatty Acyls
(2z,6e)-farnesyldiphosphate	C16826	n/a	Organic compounds	Lipids and lipid-like molecules	Prenol lipids
(3s)-3-hydroxyacyl-coa	C00640	n/a	Organic compounds	Lipids and lipid-like molecules	Fatty Acyls
(3s)-3-hydroxyadipyl-coa	C14145	n/a	Organic compounds	Lipids and lipid-like molecules	Fatty Acyls
(3s)-citryl-coa	C00566	n/a	Organic compounds	Lipids and lipid-like molecules	Fatty Acyls
(4z,7z,10z,13z,16z)-docosapentaenoyl-coa	C16173	n/a	Organic compounds	Lipids and lipid-like molecules	Fatty Acyls
(4z,7z,10z,13z,16z,19z)-docosahexaenoicacid	C06429	HXA	Organic compounds	Lipids and lipid-like molecules	Fatty Acyls
(4z,7z,10z,13z,16z,19z)-docosahexaenoyl-coa	C16169	n/a	Organic compounds	Lipids and lipid-like molecules	Fatty Acyls
(5z)-(15s)-11alpha-hydroxy-9,15-dioxoprostanoate	C04671	n/a	Organic compounds	Lipids and lipid-like molecules	Fatty Acyls
(5z,13e)-11alpha-hydroxy-9,15-dioxoprost-13-enoate	C04707	5OP	Organic compounds	Lipids and lipid-like molecules	Fatty Acyls	Biologically significant ligand;
(5z,8z,11z,14z,17z)-icosapentaenoicacid	C06428	n/a	Organic compounds	Lipids and lipid-like molecules	Fatty Acyls
(5z,8z,11z,14z,17z)-icosapentaenoyl-coa	C16165	n/a	Organic compounds	Lipids and lipid-like molecules	Fatty Acyls
(6e)-8-oxogeranial	C17622	XOG	Organic compounds	Lipids and lipid-like molecules	Prenol lipids	Biologically significant ligand;
(6z,9z,12z)-octadecatrienoicacid	C06426	n/a	Organic compounds	Lipids and lipid-like molecules	Fatty Acyls
(6z,9z,12z,15z,18z)-3-oxotetracosapenta-6,9,12,15,18-enoyl-coa	C16389	n/a	Organic compounds	Lipids and lipid-like molecules	Fatty Acyls
(6z,9z,12z,15z,18z,21z)-3-oxotetracosahexa-6,9,12,15,18,21-enoyl-coa	C16376	n/a	Organic compounds	Lipids and lipid-like molecules	Fatty Acyls
(8z,11z,14z)-icosatrienoicacid	C03242	n/a	Organic compounds	Lipids and lipid-like molecules	Fatty Acyls
(9z)-hexadecenoicacid	C08362	PAM	Organic compounds	Lipids and lipid-like molecules	Fatty Acyls	Biologically significant ligand;
(9z)-octadecenoicacid	C00712	ELA	Organic compounds	Lipids and lipid-like molecules	Fatty Acyls
(9z,12z,15z)-octadecatrienoicacid	C06427	n/a	Organic compounds	Lipids and lipid-like molecules	Fatty Acyls
(9z,12z,15z)-octadecatrienoyl-coa	C16162	n/a	Organic compounds	Lipids and lipid-like molecules	Fatty Acyls
(e)-2-methylgeranyldiphosphate	C20235	n/a	Organic compounds	Lipids and lipid-like molecules	Prenol lipids
(e)-4-(trimethylammonio)but-2-enoate	C04114	n/a	Organic compounds	Lipids and lipid-like molecules	Fatty Acyls
(e)-4-(trimethylammonio)but-2-enoyl-coa	C20748	n/a	Organic compounds	Lipids and lipid-like molecules	Fatty Acyls
(hydroxymethylphenyl)succinyl-coa	C09819	n/a	Organic compounds	Lipids and lipid-like molecules	Fatty Acyls
(r)-10-hydroxystearate	C03195	n/a	Organic compounds	Lipids and lipid-like molecules	Fatty Acyls
(r)-2,3-dihydroxy-3-methylpentanoate	C06007	n/a	Organic compounds	Lipids and lipid-like molecules	Fatty Acyls
(r)-2-hydroxy-4-methylpentanoyl-coa	C21089	IRC	Organic compounds	Lipids and lipid-like molecules	Fatty Acyls	Biologically significant ligand;
(r)-2-methylmalate	C02612	n/a	Organic compounds	Lipids and lipid-like molecules	Fatty Acyls
(r)-3-hydroxyacyl-coa	C01086	n/a	Organic compounds	Lipids and lipid-like molecules	Fatty Acyls
(r)-3-hydroxybutanoyl-coa	C03561	n/a	Organic compounds	Lipids and lipid-like molecules	Fatty Acyls
(r)-3-hydroxydodecanoyl-[acp]	C05757	n/a	Organic compounds	Lipids and lipid-like molecules	Prenol lipids
(r)-3-hydroxyhexanoyl-[acp]	C05747	n/a	Organic compounds	Lipids and lipid-like molecules	Prenol lipids
(r)-methylmalonyl-coa	C01213	n/a	Organic compounds	Lipids and lipid-like molecules	Fatty Acyls
(r)-pantoate	C00522	PAF	Organic compounds	Lipids and lipid-like molecules	Fatty Acyls	Biologically significant ligand;
(s)-2-(hydroxymethyl)glutarate	C16390	n/a	Organic compounds	Lipids and lipid-like molecules	Fatty Acyls
(s)-3-hydroxy-3-methylglutaryl-coa	C00356	HMG	Organic compounds	Lipids and lipid-like molecules	Fatty Acyls	Biologically significant ligand;
(s)-3-hydroxybutanoyl-coa	C01144	3HC	Organic compounds	Lipids and lipid-like molecules	Fatty Acyls	Biologically significant ligand;
(s)-3-hydroxydodecanoyl-coa	C05262	n/a	Organic compounds	Lipids and lipid-like molecules	Fatty Acyls
(s)-3-hydroxyhexadecanoyl-coa	C05258	n/a	Organic compounds	Lipids and lipid-like molecules	Fatty Acyls
(s)-3-hydroxyisobutyryl-coa	C06000	n/a	Organic compounds	Lipids and lipid-like molecules	Fatty Acyls
(s)-3-hydroxyoctanoyl-coa	C05266	n/a	Organic compounds	Lipids and lipid-like molecules	Fatty Acyls
(s)-3-hydroxytetradecanoyl-coa	C05260	n/a	Organic compounds	Lipids and lipid-like molecules	Fatty Acyls
(s)-hydroxydecanoyl-coa	C05264	n/a	Organic compounds	Lipids and lipid-like molecules	Fatty Acyls
(s)-hydroxyhexanoyl-coa	C05268	3H9	Organic compounds	Lipids and lipid-like molecules	Fatty Acyls	Biologically significant ligand;
(s)-methylmalonyl-coa	C00683	MCA	Organic compounds	Lipids and lipid-like molecules	Fatty Acyls
[(1r)-2,2,3-trimethyl-5-oxocyclopent-3-enyl]acetyl-coa	C07160	n/a	Organic compounds	Lipids and lipid-like molecules	Fatty Acyls
[dihydrolipoyllysine-residuesuccinyltransferase]s-glutaryldihydrolipoyllysine	C06157	n/a	Organic compounds	Lipids and lipid-like molecules	Fatty Acyls
[protein]-nomega-methyl-l-arginine	C04143	n/a	Organic compounds	Lipids and lipid-like molecules	Steroids and steroid derivatives
1,2-diacyl-3-beta-d-galactosyl-sn-glycerol	C03692	n/a	Organic compounds	Lipids and lipid-like molecules	Fatty Acyls
10-formyltetrahydrofolylpolyglutamate	C05929	n/a	Organic compounds	Lipids and lipid-like molecules	Fatty Acyls
11,12,15-theta	C14782	n/a	Organic compounds	Lipids and lipid-like molecules	Fatty Acyls
11,12-dhet	C14774	n/a	Organic compounds	Lipids and lipid-like molecules	Fatty Acyls
11,12-eet	C14770	n/a	Organic compounds	Lipids and lipid-like molecules	Fatty Acyls
11,14,15-theta	C14814	n/a	Organic compounds	Lipids and lipid-like molecules	Fatty Acyls
11beta,17alpha,21-trihydroxy-5beta-pregnane-3,20-dione	C05471	n/a	Organic compounds	Lipids and lipid-like molecules	Steroids and steroid derivatives
11beta,17beta-dihydroxy-4-androsten-3-one	C18075	n/a	Organic compounds	Lipids and lipid-like molecules	Steroids and steroid derivatives
11beta,21-dihydroxy-3,20-oxo-5beta-pregnan-18-al	C05473	n/a	Organic compounds	Lipids and lipid-like molecules	Steroids and steroid derivatives
11beta,21-dihydroxy-5beta-pregnane-3,20-dione	C05475	n/a	Organic compounds	Lipids and lipid-like molecules	Steroids and steroid derivatives
11beta-hydroxyandrost-4-ene-3,17-dione	C05284	n/a	Organic compounds	Lipids and lipid-like molecules	Steroids and steroid derivatives
11-dehydrocorticosterone	C05490	n/a	Organic compounds	Lipids and lipid-like molecules	Steroids and steroid derivatives
11h-14,15-eeta	C14813	n/a	Organic compounds	Lipids and lipid-like molecules	Fatty Acyls
12(13)-epome	C14826	n/a	Organic compounds	Lipids and lipid-like molecules	Fatty Acyls
14,15-dhet	C14775	n/a	Organic compounds	Lipids and lipid-like molecules	Fatty Acyls
14,15-eet	C14771	n/a	Organic compounds	Lipids and lipid-like molecules	Fatty Acyls
15(s)-hpete	C05966	n/a	Organic compounds	Lipids and lipid-like molecules	Fatty Acyls
15-cis-phytoene	C05421	n/a	Organic compounds	Lipids and lipid-like molecules	Prenol lipids
15-keto-prostaglandinf2alpha	C05960	n/a	Organic compounds	Lipids and lipid-like molecules	Fatty Acyls
16(r)-hete	C14778	n/a	Organic compounds	Lipids and lipid-like molecules	Fatty Acyls
16alpha-hydroxydehydroepiandrosterone	C05139	n/a	Organic compounds	Lipids and lipid-like molecules	Steroids and steroid derivatives
16alpha-hydroxyestrone	C05300	n/a	Organic compounds	Lipids and lipid-like molecules	Steroids and steroid derivatives
16-glucuronide-estriol	C05504	n/a	Organic compounds	Lipids and lipid-like molecules	Steroids and steroid derivatives
17alpha,21-dihydroxy-5beta-pregnane-3,11,20-trione	C05469	n/a	Organic compounds	Lipids and lipid-like molecules	Steroids and steroid derivatives
17alpha-hydroxyprogesterone	C01176	n/a	Organic compounds	Lipids and lipid-like molecules	Steroids and steroid derivatives
17beta-hydroxyandrostan-3-one	C03917	DHT	Organic compounds	Lipids and lipid-like molecules	Steroids and steroid derivatives
19(s)-hete	C14749	n/a	Organic compounds	Lipids and lipid-like molecules	Fatty Acyls
1-acyl-sn-glycero-3-phosphoethanolamine	C04438	n/a	Organic compounds	Lipids and lipid-like molecules	Fatty Acyls
1-hydroxy-2-methyl-2-butenyl4-diphosphate	C11811	H6P	Organic compounds	Lipids and lipid-like molecules	Prenol lipids	Biologically significant ligand;
1-octanol	C00756	n/a	Organic compounds	Lipids and lipid-like molecules	Fatty Acyls
1-radyl-2-acyl-sn-glycero-3-phosphocholine	C05212	n/a	Organic compounds	Lipids and lipid-like molecules	Prenol lipids
2-(acetamidomethylene)succinate	C01215	n/a	Organic compounds	Lipids and lipid-like molecules	Fatty Acyls
2-(alpha-d-mannosyl)-3-phosphoglycerate	C11516	n/a	Organic compounds	Lipids and lipid-like molecules	Fatty Acyls
2,2-dialkylglycine	C02623	n/a	Organic compounds	Lipids and lipid-like molecules	Steroids and steroid derivatives
2,3,5-trichlorodienelactone	C18242	n/a	Organic compounds	Lipids and lipid-like molecules	Fatty Acyls
2,3-bis-(o-phytanyl)-sn-glycerol1-phosphate	C20518	n/a	Organic compounds	Lipids and lipid-like molecules	Prenol lipids
2,3-bis-o-(geranylgeranyl)glycerol1-phosphate	C04638	n/a	Organic compounds	Lipids and lipid-like molecules	Prenol lipids
2,3-dehydroacyl-coa	C00605	n/a	Organic compounds	Lipids and lipid-like molecules	Fatty Acyls
2,3-dihydroxy-3-methylbutanoate	C04039	n/a	Organic compounds	Lipids and lipid-like molecules	Fatty Acyls
21-hydroxy-5beta-pregnane-3,11,20-trione	C05477	n/a	Organic compounds	Lipids and lipid-like molecules	Steroids and steroid derivatives
2-acetyl-1-alkyl-sn-glycero-3-phosphocholine	C04598	n/a	Organic compounds	Lipids and lipid-like molecules	Prenol lipids
2-acyl-sn-glycero-3-phosphoethanolamine	C05973	n/a	Organic compounds	Lipids and lipid-like molecules	Prenol lipids
2-acyl-sn-glycero-3-phosphoserine	C05974	n/a	Organic compounds	Lipids and lipid-like molecules	Prenol lipids
2-aminobenzoylacetyl-coa	C21452	n/a	Organic compounds	Lipids and lipid-like molecules	Fatty Acyls
2-formylglutarate	C16159	n/a	Organic compounds	Lipids and lipid-like molecules	Fatty Acyls
2-hexaprenyl-3-methyl-6-methoxy-1,4-benzoquinone	C05804	n/a	Organic compounds	Lipids and lipid-like molecules	Prenol lipids
2-hexaprenyl-6-methoxy-1,4-benzoquinone	C05803	n/a	Organic compounds	Lipids and lipid-like molecules	Prenol lipids
2-hydroxy-2,4-pentadienoate	C00596	n/a	Organic compounds	Lipids and lipid-like molecules	Fatty Acyls
2-hydroxyestradiol	C05301	n/a	Organic compounds	Lipids and lipid-like molecules	Steroids and steroid derivatives
2-hydroxyestrone	C05298	n/a	Organic compounds	Lipids and lipid-like molecules	Steroids and steroid derivatives
2-hydroxyglutaryl-coa	C03058	n/a	Organic compounds	Lipids and lipid-like molecules	Fatty Acyls
2-iminobutanoate	C20905	n/a	Organic compounds	Lipids and lipid-like molecules	Fatty Acyls
2-isopropylmaleate	C02631	n/a	Organic compounds	Lipids and lipid-like molecules	Fatty Acyls
2-methoxy-17beta-estradiol	C05302	n/a	Organic compounds	Lipids and lipid-like molecules	Steroids and steroid derivatives
2-methoxy-6-all-trans-polyprenyl-1,4-benzoquinol	C19858	n/a	Organic compounds	Lipids and lipid-like molecules	Prenol lipids
2-methoxy-estradiol-17beta3-glucuronide	C11131	n/a	Organic compounds	Lipids and lipid-like molecules	Steroids and steroid derivatives
2-methoxyestrone	C05299	n/a	Organic compounds	Lipids and lipid-like molecules	Steroids and steroid derivatives
2-methoxyestrone3-glucuronide	C11132	n/a	Organic compounds	Lipids and lipid-like molecules	Steroids and steroid derivatives
2-methylacetoacetyl-coa	C03344	n/a	Organic compounds	Lipids and lipid-like molecules	Fatty Acyls
2-methylbut-2-enoyl-coa	C03345	n/a	Organic compounds	Lipids and lipid-like molecules	Fatty Acyls
2-methylmaleate	C02226	CIZ	Organic compounds	Lipids and lipid-like molecules	Fatty Acyls
2-methylprop-2-enoyl-coa	C03460	n/a	Organic compounds	Lipids and lipid-like molecules	Fatty Acyls
2-o-(alpha-d-mannopyranosyl)-d-glycerate	C11544	2M8	Organic compounds	Lipids and lipid-like molecules	Fatty Acyls	Biologically significant ligand;
2-octaprenyl-3-methyl-6-methoxy-1,4-benzoquinone	C05814	n/a	Organic compounds	Lipids and lipid-like molecules	Prenol lipids
2-octaprenyl-6-methoxy-1,4-benzoquinone	C05813	n/a	Organic compounds	Lipids and lipid-like molecules	Prenol lipids
2-oxo-4-methylthiobutanoate	C01180	KMT	Organic compounds	Lipids and lipid-like molecules	Fatty Acyls
2-trans,6-trans-farnesal	C03461	n/a	Organic compounds	Lipids and lipid-like molecules	Prenol lipids
2-trans-dodecenoyl-coa	C03221	n/a	Organic compounds	Lipids and lipid-like molecules	Fatty Acyls
3-[(3as,4s,7as)-7a-methyl-1,5-dioxo-octahydro-1h-inden-4-yl]propanoate	C20199	n/a	Organic compounds	Lipids and lipid-like molecules	Fatty Acyls
3alpha,11beta,21-trihydroxy-20-oxo-5beta-pregnan-18-al	C05474	n/a	Organic compounds	Lipids and lipid-like molecules	Steroids and steroid derivatives
3alpha,12alpha-dihydroxy-7-oxo-5beta-cholan-24-oate	C04643	n/a	Organic compounds	Lipids and lipid-like molecules	Steroids and steroid derivatives
3alpha,20alpha,21-trihydroxy-5beta-pregnan-11-one	C05483	n/a	Organic compounds	Lipids and lipid-like molecules	Steroids and steroid derivatives
3alpha,21-dihydroxy-5beta-pregnane-11,20-dione	C05478	n/a	Organic compounds	Lipids and lipid-like molecules	Steroids and steroid derivatives
3alpha,7alpha,12alpha,24-tetrahydroxy-5beta-cholestanoyl-coa	C05450	n/a	Organic compounds	Lipids and lipid-like molecules	Fatty Acyls
3alpha,7alpha,12alpha-trihydroxy-5beta-24-oxocholestanoyl-coa	C05467	n/a	Organic compounds	Lipids and lipid-like molecules	Fatty Acyls
3alpha,7alpha,12alpha-trihydroxy-5beta-cholestane	C05454	n/a	Organic compounds	Lipids and lipid-like molecules	Steroids and steroid derivatives
3alpha,7alpha,24-trihydroxy-5beta-cholestanoyl-coa	C05448	n/a	Organic compounds	Lipids and lipid-like molecules	Fatty Acyls
3alpha,7alpha,26-trihydroxy-5beta-cholestane	C05444	n/a	Organic compounds	Lipids and lipid-like molecules	Steroids and steroid derivatives
3alpha,7alpha-dihydroxy-5beta-24-oxocholestanoyl-coa	C05449	n/a	Organic compounds	Lipids and lipid-like molecules	Fatty Acyls
3alpha,7alpha-dihydroxy-5beta-cholestan-26-al	C05445	n/a	Organic compounds	Lipids and lipid-like molecules	Steroids and steroid derivatives
3alpha,7alpha-dihydroxy-5beta-cholestanate	C04554	n/a	Organic compounds	Lipids and lipid-like molecules	Steroids and steroid derivatives
3alpha,7alpha-dihydroxy-5beta-cholestane	C05452	n/a	Organic compounds	Lipids and lipid-like molecules	Steroids and steroid derivatives
3alpha-hydroxysteroid	C03072	n/a	Organic compounds	Lipids and lipid-like molecules	Steroids and steroid derivatives
3-beta-d-galactosyl-sn-glycerol	C05401	RGG	Organic compounds	Lipids and lipid-like molecules	Glycerolipids
3beta-hydroxyandrost-5-en-17-one	C01227	AND	Organic compounds	Lipids and lipid-like molecules	Steroids and steroid derivatives	Biologically significant ligand;
3beta-hydroxyandrost-5-en-17-one3-sulfate	C04555	n/a	Organic compounds	Lipids and lipid-like molecules	Steroids and steroid derivatives
3beta-hydroxypregn-5-en-20-onesulfate	C18044	n/a	Organic compounds	Lipids and lipid-like molecules	Steroids and steroid derivatives
3-chloro-2-methyldienelactone	C18309	n/a	Organic compounds	Lipids and lipid-like molecules	Fatty Acyls
3-hexenol	C08492	n/a	Organic compounds	Lipids and lipid-like molecules	Fatty Acyls
3-hydroxy-2,6-dimethyl-5-methylene-heptanoyl-coa	C11947	n/a	Organic compounds	Lipids and lipid-like molecules	Fatty Acyls
3-hydroxy-5-methylhex-4-enoyl-coa	C16469	n/a	Organic compounds	Lipids and lipid-like molecules	Fatty Acyls
3-hydroxy-5-oxohexanoyl-coa	C16273	n/a	Organic compounds	Lipids and lipid-like molecules	Fatty Acyls
3-hydroxybutanoyl-coa	C05116	n/a	Organic compounds	Lipids and lipid-like molecules	Fatty Acyls
3-hydroxyisovaleryl-coa	C05998	n/a	Organic compounds	Lipids and lipid-like molecules	Fatty Acyls
3-hydroxy-opc4-coa	C16337	n/a	Organic compounds	Lipids and lipid-like molecules	Fatty Acyls
3-hydroxy-opc6-coa	C16333	n/a	Organic compounds	Lipids and lipid-like molecules	Fatty Acyls
3-hydroxy-opc8-coa	C16329	n/a	Organic compounds	Lipids and lipid-like molecules	Fatty Acyls
3-hydroxypimeloyl-coa	C06714	n/a	Organic compounds	Lipids and lipid-like molecules	Fatty Acyls
3-hydroxypropionyl-coa	C05668	n/a	Organic compounds	Lipids and lipid-like molecules	Fatty Acyls
3-methylcrotonyl-coa	C03069	n/a	Organic compounds	Lipids and lipid-like molecules	Fatty Acyls
3-methylglutaconyl-coa	C03231	n/a	Organic compounds	Lipids and lipid-like molecules	Fatty Acyls
3-oxoacyl-coa	C00264	n/a	Organic compounds	Lipids and lipid-like molecules	Fatty Acyls
3-oxoadipyl-coa	C02232	n/a	Organic compounds	Lipids and lipid-like molecules	Fatty Acyls
3-oxodecanoyl-coa	C05265	n/a	Organic compounds	Lipids and lipid-like molecules	Fatty Acyls
3-oxododecanoyl-coa	C05263	n/a	Organic compounds	Lipids and lipid-like molecules	Fatty Acyls
3-oxohexanoyl-coa	C05269	n/a	Organic compounds	Lipids and lipid-like molecules	Fatty Acyls
3-oxooctanoyl-coa	C05267	n/a	Organic compounds	Lipids and lipid-like molecules	Fatty Acyls
3-oxo-opc4-coa	C16338	n/a	Organic compounds	Lipids and lipid-like molecules	Fatty Acyls
3-oxo-opc6-coa	C16334	n/a	Organic compounds	Lipids and lipid-like molecules	Fatty Acyls
3-oxo-opc8-coa	C16330	n/a	Organic compounds	Lipids and lipid-like molecules	Fatty Acyls
3-oxopalmitoyl-coa	C05259	n/a	Organic compounds	Lipids and lipid-like molecules	Fatty Acyls
3-oxopimeloyl-coa	C06715	n/a	Organic compounds	Lipids and lipid-like molecules	Fatty Acyls
3-oxotetradecanoyl-coa	C05261	n/a	Organic compounds	Lipids and lipid-like molecules	Fatty Acyls
4-(2-carboxyphenyl)-4-oxobutanoyl-coa	C03160	n/a	Organic compounds	Lipids and lipid-like molecules	Fatty Acyls
4-(methylnitrosamino)-1-(3-pyridyl)-1-butanolglucuronide	C19605	n/a	Organic compounds	Lipids and lipid-like molecules	Fatty Acyls
4-carboxy-2-hydroxymuconatesemialdehyde	C04484	n/a	Organic compounds	Lipids and lipid-like molecules	Fatty Acyls
4-chlorobenzoyl-coa	C06387	01A	Organic compounds	Lipids and lipid-like molecules	Fatty Acyls	Biologically significant ligand;
4-cholesten-7alpha,12alpha-diol-3-one	C17339	n/a	Organic compounds	Lipids and lipid-like molecules	Steroids and steroid derivatives
4-fluorobenzoyl-coa	C02802	n/a	Organic compounds	Lipids and lipid-like molecules	Fatty Acyls
4-trimethylammoniobutanoate	C01181	n/a	Organic compounds	Lipids and lipid-like molecules	Fatty Acyls
4-trimethylammoniobutanoyl-coa	C20749	n/a	Organic compounds	Lipids and lipid-like molecules	Fatty Acyls
5,6-dhet	C14772	n/a	Organic compounds	Lipids and lipid-like molecules	Fatty Acyls
5,6-eet	C14768	n/a	Organic compounds	Lipids and lipid-like molecules	Fatty Acyls
5alpha-androstane-3,17-dione	C00674	5SD	Organic compounds	Lipids and lipid-like molecules	Steroids and steroid derivatives
5-androstene-3,17-dione	C20252	n/a	Organic compounds	Lipids and lipid-like molecules	Steroids and steroid derivatives
5beta-androstane-3,17-dione	C03772	n/a	Organic compounds	Lipids and lipid-like molecules	Steroids and steroid derivatives
5beta-cholestan-3-one	C03091	n/a	Organic compounds	Lipids and lipid-like molecules	Steroids and steroid derivatives
5beta-dihydrotestosterone	C05293	n/a	Organic compounds	Lipids and lipid-like molecules	Steroids and steroid derivatives
5beta-pregnane-3,20-dione	C05479	n/a	Organic compounds	Lipids and lipid-like molecules	Steroids and steroid derivatives
5-carboxy-2-pentenoyl-coa	C14144	n/a	Organic compounds	Lipids and lipid-like molecules	Fatty Acyls
5-hydroxyferuloyl-coa	C12203	FRE	Organic compounds	Lipids and lipid-like molecules	Fatty Acyls	Biologically significant ligand;
5-methyl-3-oxo-4-hexenoyl-coa	C16471	n/a	Organic compounds	Lipids and lipid-like molecules	Fatty Acyls
5-methylhex-4-enoyl-coa	C16470	n/a	Organic compounds	Lipids and lipid-like molecules	Fatty Acyls
6-carboxyhexanoyl-coa	C01063	n/a	Organic compounds	Lipids and lipid-like molecules	Fatty Acyls
7,8-diaminononanoate	C01037	DNN	Organic compounds	Lipids and lipid-like molecules	Fatty Acyls	Biologically significant ligand;
7alpha,12alpha-dihydroxy-5alpha-cholestan-3-one	C05458	n/a	Organic compounds	Lipids and lipid-like molecules	Steroids and steroid derivatives
7alpha,12alpha-dihydroxy-5beta-cholestan-3-one	C05453	n/a	Organic compounds	Lipids and lipid-like molecules	Steroids and steroid derivatives
7alpha-hydroxy-5beta-cholestan-3-one	C05451	n/a	Organic compounds	Lipids and lipid-like molecules	Steroids and steroid derivatives
7alpha-hydroxyandrost-4-ene-3,17-dione	C05296	n/a	Organic compounds	Lipids and lipid-like molecules	Steroids and steroid derivatives
7alpha-hydroxycholest-4-en-3-one	C05455	n/a	Organic compounds	Lipids and lipid-like molecules	Steroids and steroid derivatives
7alpha-hydroxytestosterone	C05291	n/a	Organic compounds	Lipids and lipid-like molecules	Steroids and steroid derivatives
7-methyl-3-oxo-6-octenoyl-coa	C16466	n/a	Organic compounds	Lipids and lipid-like molecules	Fatty Acyls
8,11,14-eicosatrienoyl-coa	C03595	n/a	Organic compounds	Lipids and lipid-like molecules	Fatty Acyls
8,9-dhet	C14773	n/a	Organic compounds	Lipids and lipid-like molecules	Fatty Acyls
8,9-eet	C14769	n/a	Organic compounds	Lipids and lipid-like molecules	Fatty Acyls
8-amino-7-oxononanoate	C01092	KAP	Organic compounds	Lipids and lipid-like molecules	Fatty Acyls	Biologically significant ligand;
9(10)-epome	C14825	n/a	Organic compounds	Lipids and lipid-like molecules	Fatty Acyls
9-cis-retinal	C16681	n/a	Organic compounds	Lipids and lipid-like molecules	Prenol lipids
9-cis-retinoicacid	C15493	REA	Organic compounds	Lipids and lipid-like molecules	Prenol lipids
acetoacetyl-coa	C00332	CAA	Organic compounds	Lipids and lipid-like molecules	Fatty Acyls	Biologically significant ligand;
acetyl-coa	C00024	ACO	Organic compounds	Lipids and lipid-like molecules	Fatty Acyls	Biologically significant ligand;
acryloyl-coa	C00894	n/a	Organic compounds	Lipids and lipid-like molecules	Fatty Acyls
acylcholine	C01777	n/a	Organic compounds	Lipids and lipid-like molecules	Prenol lipids
adipate	C06104	0L1	Organic compounds	Lipids and lipid-like molecules	Fatty Acyls
adipatesemialdehyde	C06102	n/a	Organic compounds	Lipids and lipid-like molecules	Fatty Acyls
adrenosterone	C05285	n/a	Organic compounds	Lipids and lipid-like molecules	Steroids and steroid derivatives
aldosterone	C01780	n/a	Organic compounds	Lipids and lipid-like molecules	Steroids and steroid derivatives
alkylsulfenate	C02245	n/a	Organic compounds	Lipids and lipid-like molecules	Steroids and steroid derivatives
all-trans-18-hydroxyretinoicacid	C16679	n/a	Organic compounds	Lipids and lipid-like molecules	Prenol lipids
all-trans-4-hydroxyretinoicacid	C16677	n/a	Organic compounds	Lipids and lipid-like molecules	Prenol lipids
all-trans-5,6-epoxyretinoicacid	C16680	n/a	Organic compounds	Lipids and lipid-like molecules	Prenol lipids
all-trans-lycopene	C05432	n/a	Organic compounds	Lipids and lipid-like molecules	Prenol lipids
all-trans-neurosporene	C05431	n/a	Organic compounds	Lipids and lipid-like molecules	Prenol lipids
all-trans-phytofluene	C05414	n/a	Organic compounds	Lipids and lipid-like molecules	Prenol lipids
all-trans-retinoyl-beta-glucuronide	C11061	n/a	Organic compounds	Lipids and lipid-like molecules	Prenol lipids
all-trans-zeta-carotene	C05430	n/a	Organic compounds	Lipids and lipid-like molecules	Prenol lipids
alpha,alpha'-trehalose6,6'-bismycolate	C04465	n/a	Organic compounds	Lipids and lipid-like molecules	Saccharolipids
alpha,alpha'-trehalose6-mycolate	C04218	n/a	Organic compounds	Lipids and lipid-like molecules	Saccharolipids
alpha-aminoacidester	C03317	n/a	Organic compounds	Lipids and lipid-like molecules	Steroids and steroid derivatives
alpha-D-GalNAc-(1-3)-alpha-D-GalNAc-diphospho-ditrans	C20621	n/a	Organic compounds	Lipids and lipid-like molecules	Prenol lipids
alpha-hydroxyfattyacid	C05102	n/a	Organic compounds	Lipids and lipid-like molecules	Prenol lipids
alpha-isopropylmalate	C02504	n/a	Organic compounds	Lipids and lipid-like molecules	Fatty Acyls
androsta-1,4-diene-3,17-dione	C20144	ANB	Organic compounds	Lipids and lipid-like molecules	Steroids and steroid derivatives	Biologically significant ligand;
androstan-3alpha,17beta-diol	C03852	n/a	Organic compounds	Lipids and lipid-like molecules	Steroids and steroid derivatives
androstenediol	C04295	B81	Organic compounds	Lipids and lipid-like molecules	Steroids and steroid derivatives
androstenedione	C00280	ASD	Organic compounds	Lipids and lipid-like molecules	Steroids and steroid derivatives	Biologically significant ligand;
androsterone	C00523	n/a	Organic compounds	Lipids and lipid-like molecules	Steroids and steroid derivatives
androsteroneglucuronide	C11135	n/a	Organic compounds	Lipids and lipid-like molecules	Steroids and steroid derivatives
anthraniloyl-coa	C02247	COW	Organic compounds	Lipids and lipid-like molecules	Fatty Acyls	Biologically significant ligand;
arachidonate	C00219	ACD	Organic compounds	Lipids and lipid-like molecules	Fatty Acyls
arachidonyl-coa	C02249	n/a	Organic compounds	Lipids and lipid-like molecules	Fatty Acyls
benzoylacetyl-coa	C07118	n/a	Organic compounds	Lipids and lipid-like molecules	Fatty Acyls
benzoyl-coa	C00512	n/a	Organic compounds	Lipids and lipid-like molecules	Fatty Acyls
benzoylsuccinyl-coa	C09820	n/a	Organic compounds	Lipids and lipid-like molecules	Fatty Acyls
butanoicacid	C00246	BUA	Organic compounds	Lipids and lipid-like molecules	Fatty Acyls	Biologically significant ligand;
butanoyl-coa	C00136	BCO	Organic compounds	Lipids and lipid-like molecules	Fatty Acyls	Biologically significant ligand;
caffeoyl-coa	C00323	n/a	Organic compounds	Lipids and lipid-like molecules	Fatty Acyls
cdp-glycerol	C00513	C2G	Organic compounds	Lipids and lipid-like molecules	Glycerophospholipids	Biologically significant ligand;
cholest-4-en-3-one	C00599	n/a	Organic compounds	Lipids and lipid-like molecules	Steroids and steroid derivatives
cholesterol	C00187	n/a	Organic compounds	Lipids and lipid-like molecules	Steroids and steroid derivatives
cholesterolsulfate	C18043	n/a	Organic compounds	Lipids and lipid-like molecules	Steroids and steroid derivatives
cholicacid	C00695	n/a	Organic compounds	Lipids and lipid-like molecules	Steroids and steroid derivatives
cinnamoyl-coa	C00540	n/a	Organic compounds	Lipids and lipid-like molecules	Fatty Acyls
cis-2-methyl-5-isopropylhexa-2,5-dienoyl-coa	C11946	n/a	Organic compounds	Lipids and lipid-like molecules	Fatty Acyls
cis-trans-nepetalactol	C09804	n/a	Organic compounds	Lipids and lipid-like molecules	Prenol lipids
coa-disulfide	C02015	n/a	Organic compounds	Lipids and lipid-like molecules	Alkyl-CoA disulfides
corticosterone	C02140	n/a	Organic compounds	Lipids and lipid-like molecules	Steroids and steroid derivatives
cortisol	C00735	n/a	Organic compounds	Lipids and lipid-like molecules	Steroids and steroid derivatives
cortisone	C00762	n/a	Organic compounds	Lipids and lipid-like molecules	Steroids and steroid derivatives
cortol	C05482	n/a	Organic compounds	Lipids and lipid-like molecules	Steroids and steroid derivatives
cortolone	C05481	n/a	Organic compounds	Lipids and lipid-like molecules	Steroids and steroid derivatives
crotonoyl-coa	C00877	COO	Organic compounds	Lipids and lipid-like molecules	Fatty Acyls
cyanohydrin	C05712	n/a	Organic compounds	Lipids and lipid-like molecules	Steroids and steroid derivatives
decanoyl-[acp]	C05755	n/a	Organic compounds	Lipids and lipid-like molecules	Steroids and steroid derivatives
decanoyl-coa	C05274	n/a	Organic compounds	Lipids and lipid-like molecules	Fatty Acyls
d-erythro-3-methylmalate	C06032	n/a	Organic compounds	Lipids and lipid-like molecules	Fatty Acyls
dialkylketone	C02146	n/a	Organic compounds	Lipids and lipid-like molecules	Fatty Acyls
dihydro-4-coumaroyl-coa	C21913	n/a	Organic compounds	Lipids and lipid-like molecules	Fatty Acyls
dihydrolipoamide	C00579	n/a	Organic compounds	Lipids and lipid-like molecules	Fatty Acyls
dimethylallyldiphosphate	C00235	DMA	Organic compounds	Lipids and lipid-like molecules	Prenol lipids	Biologically significant ligand;
dimethylallylphosphate	C21214	4LR	Organic compounds	Lipids and lipid-like molecules	Prenol lipids	Biologically significant ligand;
ditrans,polycis-polyprenyldiphosphate	C05859	n/a	Organic compounds	Lipids and lipid-like molecules	Prenol lipids
di-trans,poly-cis-undecaprenyldiphosphate	C04574	n/a	Organic compounds	Lipids and lipid-like molecules	Prenol lipids
dl-glycerol1-phosphate	C03189	n/a	Organic compounds	Lipids and lipid-like molecules	Glycerophospholipids
d-man-alpha-(1-	C19855	n/a	Organic compounds	Lipids and lipid-like molecules	Prenol lipids
dodecanoicacid	C02679	DAO	Organic compounds	Lipids and lipid-like molecules	Fatty Acyls
eicosanoyl-coa	C02041	n/a	Organic compounds	Lipids and lipid-like molecules	Fatty Acyls
epiandrosterone	C07635	n/a	Organic compounds	Lipids and lipid-like molecules	Steroids and steroid derivatives
estradiol-17beta	C00951	EST	Organic compounds	Lipids and lipid-like molecules	Steroids and steroid derivatives	Biologically significant ligand;
estradiol-17beta3-glucuronide	C05503	n/a	Organic compounds	Lipids and lipid-like molecules	Steroids and steroid derivatives
estriol	C05141	n/a	Organic compounds	Lipids and lipid-like molecules	Steroids and steroid derivatives
estrone	C00468	J3Z	Organic compounds	Lipids and lipid-like molecules	Steroids and steroid derivatives
estrone3-sulfate	C02538	n/a	Organic compounds	Lipids and lipid-like molecules	Steroids and steroid derivatives
estroneglucuronide	C11133	n/a	Organic compounds	Lipids and lipid-like molecules	Steroids and steroid derivatives
etiocholan-3alpha-ol-17-one3-glucuronide	C11136	n/a	Organic compounds	Lipids and lipid-like molecules	Steroids and steroid derivatives
etiocholanolone	C04373	n/a	Organic compounds	Lipids and lipid-like molecules	Steroids and steroid derivatives
farnesoicacid	C16502	n/a	Organic compounds	Lipids and lipid-like molecules	Prenol lipids
feruloyl-coa	C00406	n/a	Organic compounds	Lipids and lipid-like molecules	Fatty Acyls
feruloyl-diketide-coa	C17741	n/a	Organic compounds	Lipids and lipid-like molecules	Fatty Acyls
gamma-linolenoyl-coa	C03035	n/a	Organic compounds	Lipids and lipid-like molecules	Fatty Acyls
geranyldiphosphate	C00341	GPP	Organic compounds	Lipids and lipid-like molecules	Prenol lipids	Biologically significant ligand;
geranylgeranyldiphosphate	C00353	n/a	Organic compounds	Lipids and lipid-like molecules	Prenol lipids
glutaconyl-1-coa	C02411	n/a	Organic compounds	Lipids and lipid-like molecules	Fatty Acyls
glutaryl-coa	C00527	n/a	Organic compounds	Lipids and lipid-like molecules	Fatty Acyls
glycolithocholate	C15557	n/a	Organic compounds	Lipids and lipid-like molecules	Steroids and steroid derivatives
glycolithocholate3-sulfate	C11301	n/a	Organic compounds	Lipids and lipid-like molecules	Steroids and steroid derivatives
hexadecenal	C06123	n/a	Organic compounds	Lipids and lipid-like molecules	Fatty Acyls
hexanoyl-coa	C05270	HXC	Organic compounds	Lipids and lipid-like molecules	Fatty Acyls
hn	C00205	n/a	Organic compounds	Lipids and lipid-like molecules	Prenol lipids
icosanoicacid	C06425	DCR	Organic compounds	Lipids and lipid-like molecules	Fatty Acyls
iminoarginine	C21026	IAR	Organic compounds	Lipids and lipid-like molecules	Fatty Acyls	Biologically significant ligand;
isocaprenoyl-coa	C21090	n/a	Organic compounds	Lipids and lipid-like molecules	Fatty Acyls
isopentenyldiphosphate	C00129	IPE	Organic compounds	Lipids and lipid-like molecules	Prenol lipids	Biologically significant ligand;
isopentenylphosphate	C20345	IP8	Organic compounds	Lipids and lipid-like molecules	Prenol lipids	Biologically significant ligand;
itaconate	C00490	ITN	Organic compounds	Lipids and lipid-like molecules	Fatty Acyls
itaconyl-coa	C00531	n/a	Organic compounds	Lipids and lipid-like molecules	Fatty Acyls
lauroyl-coa	C01832	DCC	Organic compounds	Lipids and lipid-like molecules	Fatty Acyls
l-carnitinyl-coa	C20750	CCQ	Organic compounds	Lipids and lipid-like molecules	Fatty Acyls	Biologically significant ligand;
l-fuculose	C01721	CVU	Organic compounds	Lipids and lipid-like molecules	Fatty Acyls	Biologically significant ligand;
linoleate	C01595	EIC	Organic compounds	Lipids and lipid-like molecules	Fatty Acyls
linoleoyl-coa	C02050	n/a	Organic compounds	Lipids and lipid-like molecules	Fatty Acyls
long-chaincarboxylate	C00347	n/a	Organic compounds	Lipids and lipid-like molecules	Prenol lipids
malonyl-coa	C00083	MLC	Organic compounds	Lipids and lipid-like molecules	Fatty Acyls	Biologically significant ligand;
menaquinol	C05819	n/a	Organic compounds	Lipids and lipid-like molecules	Prenol lipids
monocarboxylate	C00060	n/a	Organic compounds	Lipids and lipid-like molecules	Prenol lipids
n-(4-aminobutylidene)-[enzyme]-lysine	C15854	n/a	Organic compounds	Lipids and lipid-like molecules	Prenol lipids
n-(6-aminohexanoyl)-6-aminohexanoate	C01255	n/a	Organic compounds	Lipids and lipid-like molecules	Fatty Acyls
n-acetyl-alpha-d-galactosaminyl-diphospho-ditrans,octacis-undecaprenol	C20620	n/a	Organic compounds	Lipids and lipid-like molecules	Prenol lipids
n-acyl-d-mannosamine	C00625	n/a	Organic compounds	Lipids and lipid-like molecules	Prenol lipids
ndp-alpha-d-glucose	C15541	n/a	Organic compounds	Lipids and lipid-like molecules	Fatty Acyls
n-methylanthraniloyl-coa	C12092	n/a	Organic compounds	Lipids and lipid-like molecules	Fatty Acyls
octadecanoicacid	C01530	STE	Organic compounds	Lipids and lipid-like molecules	Fatty Acyls
octanoyl-coa	C01944	CO8	Organic compounds	Lipids and lipid-like molecules	Fatty Acyls
oleamide	C19670	n/a	Organic compounds	Lipids and lipid-like molecules	Fatty Acyls
oleoyl-coa	C00510	n/a	Organic compounds	Lipids and lipid-like molecules	Fatty Acyls
opc4-coa	C16335	n/a	Organic compounds	Lipids and lipid-like molecules	Fatty Acyls
opc6-coa	C16331	n/a	Organic compounds	Lipids and lipid-like molecules	Fatty Acyls
o-phosphoseryl-trna(cys)	C17022	n/a	Organic compounds	Lipids and lipid-like molecules	Steroids and steroid derivatives
o-phosphoseryl-trna(sec)	C16638	n/a	Organic compounds	Lipids and lipid-like molecules	Fatty Acyls
oxalyl-coa	C00313	OXK	Organic compounds	Lipids and lipid-like molecules	Fatty Acyls	Biologically significant ligand;
palmitaldehyde	C00517	n/a	Organic compounds	Lipids and lipid-like molecules	Fatty Acyls
palmitate	C00249	PLM	Organic compounds	Lipids and lipid-like molecules	Fatty Acyls	Biologically significant ligand;
palmitoyl-coa	C00154	n/a	Organic compounds	Lipids and lipid-like molecules	Fatty Acyls
p-coumaroyl-coa	C00223	n/a	Organic compounds	Lipids and lipid-like molecules	Fatty Acyls
p-coumaroyl-diketide-coa	C17740	n/a	Organic compounds	Lipids and lipid-like molecules	Fatty Acyls
perillicacid	C11924	n/a	Organic compounds	Lipids and lipid-like molecules	Prenol lipids
perillylaldehyde	C02576	n/a	Organic compounds	Lipids and lipid-like molecules	Prenol lipids
phenylacetyl-coa	C00582	n/a	Organic compounds	Lipids and lipid-like molecules	Fatty Acyls
phosphatidylinositol-3,4,5-trisphosphate	C05981	n/a	Organic compounds	Lipids and lipid-like molecules	Prenol lipids
phosphatidylserine	C02737	n/a	Organic compounds	Lipids and lipid-like molecules	Steroids and steroid derivatives
phospholipidcyclopropanefattyacid	C04340	n/a	Organic compounds	Lipids and lipid-like molecules	Fatty Acyls
phylloquinol	C03313	n/a	Organic compounds	Lipids and lipid-like molecules	Prenol lipids
Phylloquinone	C02059	n/a	Organic compounds	Lipids and lipid-like molecules	Prenol lipids
phytyldiphosphate	C05427	n/a	Organic compounds	Lipids and lipid-like molecules	Prenol lipids
pregnanediol	C05484	n/a	Organic compounds	Lipids and lipid-like molecules	Steroids and steroid derivatives
pregnanolone	C05480	n/a	Organic compounds	Lipids and lipid-like molecules	Steroids and steroid derivatives
pregnenolone	C01953	PLO	Organic compounds	Lipids and lipid-like molecules	Steroids and steroid derivatives	Biologically significant ligand;
progesterone	C00410	n/a	Organic compounds	Lipids and lipid-like molecules	Steroids and steroid derivatives
propanoyl-coa	C00100	n/a	Organic compounds	Lipids and lipid-like molecules	Fatty Acyls
prostaglandine2	C00584	n/a	Organic compounds	Lipids and lipid-like molecules	Fatty Acyls
prostaglandinf2alpha	C00639	n/a	Organic compounds	Lipids and lipid-like molecules	Fatty Acyls
proteinl-glutamatemethylester	C04142	n/a	Organic compounds	Lipids and lipid-like molecules	Steroids and steroid derivatives
proteinl-isoaspartatemethylester	C04311	n/a	Organic compounds	Lipids and lipid-like molecules	Steroids and steroid derivatives
proteinn6-(dihydrolipoyl)lysine	C16832	n/a	Organic compounds	Lipids and lipid-like molecules	Fatty Acyls
proteinn6-(lipoyl)lysine	C16237	n/a	Organic compounds	Lipids and lipid-like molecules	Steroids and steroid derivatives
proteinn6,n6,n6-trimethyl-l-lysine	C05546	n/a	Organic compounds	Lipids and lipid-like molecules	Steroids and steroid derivatives
proteinn6,n6-dimethyl-l-lysine	C05545	n/a	Organic compounds	Lipids and lipid-like molecules	Steroids and steroid derivatives
proteinn6-methyl-l-lysine	C05544	n/a	Organic compounds	Lipids and lipid-like molecules	Steroids and steroid derivatives
pyranoside	C15594	n/a	Organic compounds	Lipids and lipid-like molecules	Glycerolipids
retinal	C00376	n/a	Organic compounds	Lipids and lipid-like molecules	Prenol lipids
retinoate	C00777	n/a	Organic compounds	Lipids and lipid-like molecules	Prenol lipids
retinol	C00473	n/a	Organic compounds	Lipids and lipid-like molecules	Prenol lipids
sinapoyl-coa	C00411	n/a	Organic compounds	Lipids and lipid-like molecules	Fatty Acyls
sn-glycero-3-phosphocholine	C00670	n/a	Organic compounds	Lipids and lipid-like molecules	Glycerophospholipids
sn-glycero-3-phosphoethanolamine	C01233	GPE	Organic compounds	Lipids and lipid-like molecules	Glycerophospholipids
sn-glycerol1-phosphate	C00623	n/a	Organic compounds	Lipids and lipid-like molecules	Glycerophospholipids
sn-glycerol3-phosphate	C00093	1GP	Organic compounds	Lipids and lipid-like molecules	Glycerophospholipids	Biologically significant ligand;
sphinganine1-phosphate	C01120	n/a	Organic compounds	Lipids and lipid-like molecules	Sphingolipids
sphingosine1-phosphate	C06124	n/a	Organic compounds	Lipids and lipid-like molecules	Sphingolipids
stearoyl-coa	C00412	n/a	Organic compounds	Lipids and lipid-like molecules	Fatty Acyls
steroidester	C15506	n/a	Organic compounds	Lipids and lipid-like molecules	Steroids and steroid derivatives
steroidlactone	C15507	n/a	Organic compounds	Lipids and lipid-like molecules	Steroids and steroid derivatives
succinatesemialdehyde	C00232	SSN	Organic compounds	Lipids and lipid-like molecules	Fatty Acyls	Biologically significant ligand;
succinyl-coa	C00091	SCA	Organic compounds	Lipids and lipid-like molecules	Fatty Acyls	Biologically significant ligand;
taurolithocholate	C02592	n/a	Organic compounds	Lipids and lipid-like molecules	Steroids and steroid derivatives
taurolithocholatesulfate	C03642	n/a	Organic compounds	Lipids and lipid-like molecules	Steroids and steroid derivatives
testosterone	C00535	TES	Organic compounds	Lipids and lipid-like molecules	Steroids and steroid derivatives
testosteroneacetate	C03027	n/a	Organic compounds	Lipids and lipid-like molecules	Steroids and steroid derivatives
testosteroneglucuronide	C11134	n/a	Organic compounds	Lipids and lipid-like molecules	Steroids and steroid derivatives
tetradecanoicacid	C06424	MYR	Organic compounds	Lipids and lipid-like molecules	Fatty Acyls
tetradecanoyl-coa	C02593	MYA	Organic compounds	Lipids and lipid-like molecules	Fatty Acyls
tetrahydrocorticosterone	C05476	n/a	Organic compounds	Lipids and lipid-like molecules	Steroids and steroid derivatives
tetrahydrocortisone	C05470	n/a	Organic compounds	Lipids and lipid-like molecules	Steroids and steroid derivatives
thioredoxindisulfide	C00343	n/a	Organic compounds	Lipids and lipid-like molecules	Prenol lipids
trans,octacis-decaprenyldiphosphate	C18321	n/a	Organic compounds	Lipids and lipid-like molecules	Prenol lipids
trans-2-enoyl-coa	C00658	n/a	Organic compounds	Lipids and lipid-like molecules	Prenol lipids
trans-2-enoyl-opc4-coa	C16336	n/a	Organic compounds	Lipids and lipid-like molecules	Fatty Acyls
trans-2-enoyl-opc6-coa	C16332	n/a	Organic compounds	Lipids and lipid-like molecules	Fatty Acyls
trans-2-enoyl-opc8-coa	C16328	n/a	Organic compounds	Lipids and lipid-like molecules	Fatty Acyls
trans-2-methyl-5-isopropylhexa-2,5-dienoyl-coa	C11945	n/a	Organic compounds	Lipids and lipid-like molecules	Fatty Acyls
trans-dec-2-enoyl-[acp]	C05754	n/a	Organic compounds	Lipids and lipid-like molecules	Prenol lipids
trans-dec-2-enoyl-coa	C05275	n/a	Organic compounds	Lipids and lipid-like molecules	Fatty Acyls
trans-dodec-2-enoyl-[acp]	C05758	n/a	Organic compounds	Lipids and lipid-like molecules	Prenol lipids
trans-hex-2-enoyl-[acp]	C05748	n/a	Organic compounds	Lipids and lipid-like molecules	Prenol lipids
trans-hex-2-enoyl-coa	C05271	TC6	Organic compounds	Lipids and lipid-like molecules	Fatty Acyls	Biologically significant ligand;
trans-hexadec-2-enoyl-[acp]	C05763	n/a	Organic compounds	Lipids and lipid-like molecules	Prenol lipids
trans-hexadec-2-enoyl-coa	C05272	n/a	Organic compounds	Lipids and lipid-like molecules	Fatty Acyls
trans-oct-2-enoyl-coa	C05276	n/a	Organic compounds	Lipids and lipid-like molecules	Fatty Acyls
trans-tetradec-2-enoyl-[acp]	C05760	n/a	Organic compounds	Lipids and lipid-like molecules	Prenol lipids
trans-tetradec-2-enoyl-coa	C05273	n/a	Organic compounds	Lipids and lipid-like molecules	Fatty Acyls
ubiquinone	C00399	UQ2	Organic compounds	Lipids and lipid-like molecules	Steroids and steroid derivatives	Biologically significant ligand;
urocortisol	C05472	n/a	Organic compounds	Lipids and lipid-like molecules	Steroids and steroid derivatives
vitamink	C01628	n/a	Organic compounds	Lipids and lipid-like molecules	Prenol lipids
(2s)-lactyl-2-diphospho-5'-guanosine	C19155	n/a	Organic compounds	Nucleosides, nucleotides, and analogues	Purine nucleotides
(6r)-6beta-hydroxy-1,4,5,6-tetrahydronicotinamide-adeninedinucleotide	C20482	n/a	Organic compounds	Nucleosides, nucleotides, and analogues	Purine nucleotides
(6r)-6beta-hydroxy-1,4,5,6-tetrahydronicotinamide-adeninedinucleotidephosphate	C20483	n/a	Organic compounds	Nucleosides, nucleotides, and analogues	Purine nucleotides
(6s)-6beta-hydroxy-1,4,5,6-tetrahydronicotinamide-adeninedinucleotide	C04856	NAX	Organic compounds	Nucleosides, nucleotides, and analogues	Purine nucleotides	Biologically significant ligand;
(6s)-6beta-hydroxy-1,4,5,6-tetrahydronicotinamide-adeninedinucleotidephosphate	C04899	NPW	Organic compounds	Nucleosides, nucleotides, and analogues	Purine nucleotides	Biologically significant ligand;
(phosphate)n	C00404	n/a	Organic compounds	Nucleosides, nucleotides, and analogues	Pyrimidine nucleotides
1-(5-phospho-beta-d-ribosyl)-atp	C02739	PRT	Organic compounds	Nucleosides, nucleotides, and analogues	Purine nucleotides	Biologically significant ligand;
1-(5'-phosphoribosyl)-5-amino-4-imidazolecarboxamide	C04677	AMZ	Organic compounds	Nucleosides, nucleotides, and analogues	Imidazole ribonucleosides and ribonucleotides	Biologically significant ligand;
1-(5'-phosphoribosyl)-5-formamido-4-imidazolecarboxamide	C04734	FAI	Organic compounds	Nucleosides, nucleotides, and analogues	Imidazole ribonucleosides and ribonucleotides	Biologically significant ligand;
1,2-dihydro-beta-nad	C21423	TXD	Organic compounds	Nucleosides, nucleotides, and analogues	(5'->5')-dinucleotides
1,6-dihydro-beta-nad	C21424	6V0	Organic compounds	Nucleosides, nucleotides, and analogues	(5'->5')-dinucleotides
1-phosphatidyl-1d-myo-inositol	C01194	n/a	Organic compounds	Nucleosides, nucleotides, and analogues	Purine nucleosides
1-phosphatidyl-d-myo-inositol4,5-bisphosphate	C04637	n/a	Organic compounds	Nucleosides, nucleotides, and analogues	Glycinamide ribonucleotides
2-arylpropionate	C06389	n/a	Organic compounds	Nucleosides, nucleotides, and analogues	Purine nucleosides
2'-deoxy-5-hydroxymethylcytidine-5'-triphosphate	C11039	n/a	Organic compounds	Nucleosides, nucleotides, and analogues	Pyrimidine nucleotides
3',5'-cyclicdigmp	C16463	C2E	Organic compounds	Nucleosides, nucleotides, and analogues	(3'->5')-dinucleotides and analogues
3',5'-cyclicgmp	C00942	n/a	Organic compounds	Nucleosides, nucleotides, and analogues	Purine nucleotides
3'-amp	C01367	3AM	Organic compounds	Nucleosides, nucleotides, and analogues	Ribonucleoside 3'-phosphates
3'-cmp	C05822	n/a	Organic compounds	Nucleosides, nucleotides, and analogues	Pyrimidine nucleotides
3'-dephospho-coa	C00882	COD	Organic compounds	Nucleosides, nucleotides, and analogues	Purine nucleotides	Biologically significant ligand;
3'-Phosphoadenylyl_sulfate	C00053	PPS	Organic compounds	Nucleosides, nucleotides, and analogues	Purine nucleotides	Biologically significant ligand;
3'-phosphoadenylylselenate	C05696	n/a	Organic compounds	Nucleosides, nucleotides, and analogues	Purine nucleotides
3'-ump	C01368	n/a	Organic compounds	Nucleosides, nucleotides, and analogues	Ribonucleoside 3'-phosphates
4-(cytidine5'-diphospho)-2-c-methyl-d-erythritol	C11435	CDM	Organic compounds	Nucleosides, nucleotides, and analogues	Pyrimidine nucleotides	Biologically significant ligand;
5-deoxy-5-chloroadenosine	C19768	5CD	Organic compounds	Nucleosides, nucleotides, and analogues	5'-deoxyribonucleosides	Biologically significant ligand;
5'-deoxy-5'-fluoroadenosine	C19766	5FD	Organic compounds	Nucleosides, nucleotides, and analogues	5'-deoxyribonucleosides	Biologically significant ligand;
5'-deoxy-5-fluorocytidine	C16635	n/a	Organic compounds	Nucleosides, nucleotides, and analogues	5'-deoxyribonucleosides
5'-deoxy-5-fluorouridine	C12739	n/a	Organic compounds	Nucleosides, nucleotides, and analogues	5'-deoxyribonucleosides
5'-deoxyadenosine	C05198	5AD	Organic compounds	Nucleosides, nucleotides, and analogues	5'-deoxyribonucleosides
5-fluorodeoxyuridine	C11736	ID2	Organic compounds	Nucleosides, nucleotides, and analogues	Pyrimidine nucleosides	Biologically significant ligand;
5-fluorodeoxyuridinediphosphate	C21750	n/a	Organic compounds	Nucleosides, nucleotides, and analogues	Pyrimidine nucleotides
5-fluorodeoxyuridinemonophosphate	C04242	5IU	Organic compounds	Nucleosides, nucleotides, and analogues	Pyrimidine nucleotides	Biologically significant ligand;
5-fluorodeoxyuridinetriphosphate	C21751	n/a	Organic compounds	Nucleosides, nucleotides, and analogues	Pyrimidine nucleotides
5-fluorouridine	C16633	5UD	Organic compounds	Nucleosides, nucleotides, and analogues	Pyrimidine nucleosides	Biologically significant ligand;
5-fluorouridinediphosphate	C21748	n/a	Organic compounds	Nucleosides, nucleotides, and analogues	Pyrimidine nucleotides
5-fluorouridinemonophosphate	C16634	5FU	Organic compounds	Nucleosides, nucleotides, and analogues	Pyrimidine nucleotides
5-fluorouridinetriphosphate	C21749	n/a	Organic compounds	Nucleosides, nucleotides, and analogues	Pyrimidine nucleotides
5'-phosphoguanylyl(3'->5')guanosine	C18076	n/a	Organic compounds	Nucleosides, nucleotides, and analogues	(3'->5')-dinucleotides and analogues
5'-phosphoribosylglycinamide	C03838	GAR	Organic compounds	Nucleosides, nucleotides, and analogues	Glycinamide ribonucleotides	Biologically significant ligand;
6-amino-6-deoxyfutalosine	C20773	n/a	Organic compounds	Nucleosides, nucleotides, and analogues	5'-deoxyribonucleosides
6-methylthioguanosinemonophosphate	C16620	n/a	Organic compounds	Nucleosides, nucleotides, and analogues	Purine nucleotides
6-methylthiopurine5'-monophosphateribonucleotide	C16615	n/a	Organic compounds	Nucleosides, nucleotides, and analogues	Purine nucleotides
6-thioguanosinemonophosphate	C16619	n/a	Organic compounds	Nucleosides, nucleotides, and analogues	Purine nucleotides
6-thioinosine-5'-monophosphate	C04646	n/a	Organic compounds	Nucleosides, nucleotides, and analogues	Purine nucleotides
6-thioxanthine5'-monophosphate	C16618	n/a	Organic compounds	Nucleosides, nucleotides, and analogues	Purine nucleotides
7-methylxanthosine	C16352	n/a	Organic compounds	Nucleosides, nucleotides, and analogues	Purine nucleosides
acetyladenylate	C05993	6R9	Organic compounds	Nucleosides, nucleotides, and analogues	Purine nucleotides	Biologically significant ligand;
acyl-coa	C00040	n/a	Organic compounds	Nucleosides, nucleotides, and analogues	Purine nucleotides
adenosine	C00212	XYA	Organic compounds	Nucleosides, nucleotides, and analogues	Purine nucleosides	Biologically significant ligand;
adenosine3',5'-bisphosphate	C00054	A3P	Organic compounds	Nucleosides, nucleotides, and analogues	Purine nucleotides	Biologically significant ligand;
adenosine-gdp-cobinamide	C06510	n/a	Organic compounds	Nucleosides, nucleotides, and analogues	Purine nucleotides
adenylyl-molybdopterin	C19848	n/a	Organic compounds	Nucleosides, nucleotides, and analogues	Molybdopterin dinucleotides
adenylylselenate	C05686	n/a	Organic compounds	Nucleosides, nucleotides, and analogues	Purine nucleotides
adenylylsulfate	C00224	ADX	Organic compounds	Nucleosides, nucleotides, and analogues	Purine nucleotides	Biologically significant ligand;
ADP	C00008	LA8	Organic compounds	Nucleosides, nucleotides, and analogues	Purine nucleotides	Biologically significant ligand;
adp-alpha-d-glucose	C00498	ADQ	Organic compounds	Nucleosides, nucleotides, and analogues	Purine nucleotides	Biologically significant ligand;
adp-d-glycero-beta-d-manno-heptose	C06397	n/a	Organic compounds	Nucleosides, nucleotides, and analogues	Purine nucleotides
adp-l-glycero-beta-d-manno-heptose	C06398	AQH	Organic compounds	Nucleosides, nucleotides, and analogues	Purine nucleotides
adp-ribose	C00301	APR	Organic compounds	Nucleosides, nucleotides, and analogues	Purine nucleotides	Biologically significant ligand;
alpha-nadh	C20744	n/a	Organic compounds	Nucleosides, nucleotides, and analogues	(5'->5')-dinucleotides
alpha-nadph	C20745	n/a	Organic compounds	Nucleosides, nucleotides, and analogues	(5'->5')-dinucleotides
AMP	C00020	A	Organic compounds	Nucleosides, nucleotides, and analogues	Purine nucleotides	Biologically significant ligand; UniProt cofactor
ATP	C00002	ATP	Organic compounds	Nucleosides, nucleotides, and analogues	Purine nucleotides	Biologically significant ligand;
beta-nicotinamided-ribonucleotide	C00455	NMN	Organic compounds	Nucleosides, nucleotides, and analogues	Pyridine nucleotides	Biologically significant ligand;
beta-nicotinated-ribonucleotide	C01185	NCN	Organic compounds	Nucleosides, nucleotides, and analogues	Pyridine nucleotides	Biologically significant ligand;
capecitabine	C12650	n/a	Organic compounds	Nucleosides, nucleotides, and analogues	5'-deoxyribonucleosides
CDP	C00112	CDF	Organic compounds	Nucleosides, nucleotides, and analogues	Pyrimidine nucleotides	Biologically significant ligand;
cdp-1l-myo-inositol	C19794	n/a	Organic compounds	Nucleosides, nucleotides, and analogues	Pyrimidine nucleotides
cdp-3,6-dideoxy-d-mannose	C03599	n/a	Organic compounds	Nucleosides, nucleotides, and analogues	Pyrimidine nucleotides
cdp-4-dehydro-6-deoxy-d-glucose	C01219	n/a	Organic compounds	Nucleosides, nucleotides, and analogues	Pyrimidine nucleotides
cdp-alpha-d-paratose	C03598	n/a	Organic compounds	Nucleosides, nucleotides, and analogues	Pyrimidine nucleotides
cdp-choline	C00307	CDC	Organic compounds	Nucleosides, nucleotides, and analogues	Pyrimidine nucleotides	Biologically significant ligand;
cdp-ethanolamine	C00570	n/a	Organic compounds	Nucleosides, nucleotides, and analogues	Pyrimidine nucleotides
cdp-glucose	C00501	C5G	Organic compounds	Nucleosides, nucleotides, and analogues	Pyrimidine nucleotides	Biologically significant ligand;
cdp-ribitol	C00789	n/a	Organic compounds	Nucleosides, nucleotides, and analogues	Pyrimidine nucleotides
CMP	C00055	C	Organic compounds	Nucleosides, nucleotides, and analogues	Pyrimidine nucleotides	Biologically significant ligand;
cmp-2-aminoethylphosphonate	C05673	n/a	Organic compounds	Nucleosides, nucleotides, and analogues	Pyrimidine nucleotides
cmp-3-deoxy-d-manno-octulosonate	C04121	CMK	Organic compounds	Nucleosides, nucleotides, and analogues	Pyrimidine nucleotides	Biologically significant ligand;
cmp-n-acetylneuraminate	C00128	NCC	Organic compounds	Nucleosides, nucleotides, and analogues	Pyrimidine nucleotides	Biologically significant ligand;
cmp-n-glycoloylneuraminate	C03691	n/a	Organic compounds	Nucleosides, nucleotides, and analogues	Pyrimidine nucleotides
cmp-n-trimethyl-2-aminoethylphosphonate	C05674	n/a	Organic compounds	Nucleosides, nucleotides, and analogues	Pyrimidine nucleotides
CoA	C00010	COA	Organic compounds	Nucleosides, nucleotides, and analogues	Purine nucleotides	Biologically significant ligand;
CTP	C00063	CTP	Organic compounds	Nucleosides, nucleotides, and analogues	Pyrimidine nucleotides	Biologically significant ligand;
cyclobutadipyrimidine	C03103	n/a	Organic compounds	Nucleosides, nucleotides, and analogues	Pyrimidine nucleotides
cytidine	C00475	CTN	Organic compounds	Nucleosides, nucleotides, and analogues	Pyrimidine nucleosides	Biologically significant ligand;
dADP	C00206	DAT	Organic compounds	Nucleosides, nucleotides, and analogues	Purine nucleotides	Biologically significant ligand;
dAMP	C00360	D5M	Organic compounds	Nucleosides, nucleotides, and analogues	Purine nucleotides
dATP	C00131	DTP	Organic compounds	Nucleosides, nucleotides, and analogues	Purine nucleotides
dCDP	C00705	n/a	Organic compounds	Nucleosides, nucleotides, and analogues	Pyrimidine nucleotides
dCMP	C00239	DCM	Organic compounds	Nucleosides, nucleotides, and analogues	Pyrimidine nucleotides	Biologically significant ligand;
dCTP	C00458	DCP	Organic compounds	Nucleosides, nucleotides, and analogues	Pyrimidine nucleotides
deamido-nad	C00857	DND	Organic compounds	Nucleosides, nucleotides, and analogues	(5'->5')-dinucleotides	Biologically significant ligand;
deoxyadenosine	C00559	3D1	Organic compounds	Nucleosides, nucleotides, and analogues	Purine nucleosides
deoxycytidine	C00881	DCZ	Organic compounds	Nucleosides, nucleotides, and analogues	Pyrimidine nucleosides	Biologically significant ligand;
deoxyguanosine	C00330	GNG	Organic compounds	Nucleosides, nucleotides, and analogues	Purine nucleosides	Biologically significant ligand;
deoxyinosine	C05512	2ND	Organic compounds	Nucleosides, nucleotides, and analogues	Purine nucleosides
deoxyuridine	C00526	DUR	Organic compounds	Nucleosides, nucleotides, and analogues	Pyrimidine nucleosides	Biologically significant ligand;
dGDP	C00361	DGI	Organic compounds	Nucleosides, nucleotides, and analogues	Purine nucleotides
dGMP	C00362	DGP	Organic compounds	Nucleosides, nucleotides, and analogues	Purine nucleotides	Biologically significant ligand;
dGTP	C00286	DGT	Organic compounds	Nucleosides, nucleotides, and analogues	Purine nucleotides
dIDP	C01344	n/a	Organic compounds	Nucleosides, nucleotides, and analogues	Purine nucleotides
dIMP	C06196	n/a	Organic compounds	Nucleosides, nucleotides, and analogues	Purine nucleotides
dITP	C01345	n/a	Organic compounds	Nucleosides, nucleotides, and analogues	Purine nucleotides
dTDP	C00363	TYD	Organic compounds	Nucleosides, nucleotides, and analogues	Pyrimidine nucleotides	Biologically significant ligand;
dtdp-3,4-didehydro-2,6-dideoxy-alpha-d-glucose	C06620	n/a	Organic compounds	Nucleosides, nucleotides, and analogues	Pyrimidine nucleotides
dtdp-3-amino-3,4,6-trideoxy-alpha-d-glucose	C11910	n/a	Organic compounds	Nucleosides, nucleotides, and analogues	Pyrimidine nucleotides
dtdp-3-amino-3,6-dideoxy-d-glucose	C11925	T3Q	Organic compounds	Nucleosides, nucleotides, and analogues	Pyrimidine nucleotides	Biologically significant ligand;
dtdp-3-oxo-4,6-dideoxy-d-glucose	C11909	n/a	Organic compounds	Nucleosides, nucleotides, and analogues	Pyrimidine nucleotides
dtdp-4-acetamido-4,6-dideoxy-d-glucose	C06018	n/a	Organic compounds	Nucleosides, nucleotides, and analogues	Pyrimidine nucleotides
dtdp-4-amino-4,6-dideoxy-alpha-d-galactose	C04346	n/a	Organic compounds	Nucleosides, nucleotides, and analogues	Pyrimidine nucleotides
dtdp-4-amino-4,6-dideoxy-d-glucose	C04268	0FX	Organic compounds	Nucleosides, nucleotides, and analogues	Pyrimidine nucleotides
dtdp-4-dehydro-2,6-dideoxy-alpha-d-glucose	C11922	n/a	Organic compounds	Nucleosides, nucleotides, and analogues	Pyrimidine nucleotides
dtdp-4-dehydro-6-deoxy-alpha-d-glucose	C11907	n/a	Organic compounds	Nucleosides, nucleotides, and analogues	Pyrimidine nucleotides
dtdp-4-dehydro-beta-l-rhamnose	C00688	T46	Organic compounds	Nucleosides, nucleotides, and analogues	Pyrimidine nucleotides	Biologically significant ligand;
dtdp-alpha-d-glucose	C00842	DAU	Organic compounds	Nucleosides, nucleotides, and analogues	Pyrimidine nucleotides	Biologically significant ligand;
dtdp-d-desosamine	C11911	n/a	Organic compounds	Nucleosides, nucleotides, and analogues	Pyrimidine nucleotides
dtdp-d-mycaminose	C11933	QDM	Organic compounds	Nucleosides, nucleotides, and analogues	Pyrimidine nucleotides	Biologically significant ligand;
dtdp-galactose	C02097	n/a	Organic compounds	Nucleosides, nucleotides, and analogues	Pyrimidine nucleotides
dtdp-l-epivancosamine	C12321	n/a	Organic compounds	Nucleosides, nucleotides, and analogues	Pyrimidine nucleotides
dtdp-l-rhamnose	C03319	n/a	Organic compounds	Nucleosides, nucleotides, and analogues	Pyrimidine nucleotides
dtdp-l-vancosamine	C12322	n/a	Organic compounds	Nucleosides, nucleotides, and analogues	Pyrimidine nucleotides
dTMP	C00364	TMP	Organic compounds	Nucleosides, nucleotides, and analogues	Pyrimidine nucleotides	Biologically significant ligand;
dTTP	C00459	TTP	Organic compounds	Nucleosides, nucleotides, and analogues	Pyrimidine nucleotides	Biologically significant ligand;
dUDP	C01346	DUD	Organic compounds	Nucleosides, nucleotides, and analogues	Pyrimidine nucleotides
dUMP	C00365	DU	Organic compounds	Nucleosides, nucleotides, and analogues	Pyrimidine nucleotides
dUTP	C00460	DUT	Organic compounds	Nucleosides, nucleotides, and analogues	Pyrimidine nucleotides
FAD	C00016	FAD	Organic compounds	Nucleosides, nucleotides, and analogues	Flavin nucleotides	Biologically significant ligand; UniProt cofactor
FADH2	C01352	FDA	Organic compounds	Nucleosides, nucleotides, and analogues	Flavin nucleotides	Biologically significant ligand;
FMN	C00061	FMN	Organic compounds	Nucleosides, nucleotides, and analogues	Flavin nucleotides	Biologically significant ligand; UniProt cofactor
FMNH2	C01847	FNR	Organic compounds	Nucleosides, nucleotides, and analogues	Flavin nucleotides	Biologically significant ligand;
formyl-coa	C00798	FYN	Organic compounds	Nucleosides, nucleotides, and analogues	Purine nucleotides	Biologically significant ligand;
GDP	C00035	GDP	Organic compounds	Nucleosides, nucleotides, and analogues	Purine nucleotides	Biologically significant ligand;
gdp-4-amino-4,6-dideoxy-alpha-d-mannose	C20638	JB2	Organic compounds	Nucleosides, nucleotides, and analogues	Purine nucleotides
gdp-4-dehydro-6-deoxy-d-mannose	C01222	n/a	Organic compounds	Nucleosides, nucleotides, and analogues	Purine nucleotides
gdp-4-keto-6-l-deoxygalactose	C14830	n/a	Organic compounds	Nucleosides, nucleotides, and analogues	Purine nucleotides
gdp-alpha-d-rhamnose	C03117	n/a	Organic compounds	Nucleosides, nucleotides, and analogues	Purine nucleotides
gdp-beta-l-fucose	C00325	GFB	Organic compounds	Nucleosides, nucleotides, and analogues	Purine nucleotides	Biologically significant ligand;
gdp-d-mannuronate	C00976	GDX	Organic compounds	Nucleosides, nucleotides, and analogues	Purine nucleotides	Biologically significant ligand;
gdp-l-galactose	C02280	GDC	Organic compounds	Nucleosides, nucleotides, and analogues	Purine nucleotides	Biologically significant ligand;
gdp-l-gulose	C15925	GKE	Organic compounds	Nucleosides, nucleotides, and analogues	Purine nucleotides	Biologically significant ligand;
gdp-mannose	C00096	GDD	Organic compounds	Nucleosides, nucleotides, and analogues	Purine nucleotides	Biologically significant ligand;
gdp-valienol	C21368	n/a	Organic compounds	Nucleosides, nucleotides, and analogues	Purine nucleotides
GMP	C00144	G	Organic compounds	Nucleosides, nucleotides, and analogues	Purine nucleotides	Biologically significant ligand;
GTP	C00044	GTP	Organic compounds	Nucleosides, nucleotides, and analogues	Purine nucleotides	Biologically significant ligand;
guanosine	C00387	GMP	Organic compounds	Nucleosides, nucleotides, and analogues	Purine nucleosides	Biologically significant ligand;
guanosine3',5'-bis(diphosphate)	C01228	G4P	Organic compounds	Nucleosides, nucleotides, and analogues	Purine nucleotides
guanosine3'-diphosphate5'-triphosphate	C04494	0O2	Organic compounds	Nucleosides, nucleotides, and analogues	Purine nucleotides
guanosine3'-phosphate	C06193	3GP	Organic compounds	Nucleosides, nucleotides, and analogues	Ribonucleoside 3'-phosphates
guanylylmolybdenumcofactor	C19871	n/a	Organic compounds	Nucleosides, nucleotides, and analogues	Molybdopterin dinucleotides
IDP	C00104	n/a	Organic compounds	Nucleosides, nucleotides, and analogues	Purine nucleotides
IMP	C00130	IMP	Organic compounds	Nucleosides, nucleotides, and analogues	Purine nucleotides	Biologically significant ligand;
inosine	C00294	NOS	Organic compounds	Nucleosides, nucleotides, and analogues	Purine nucleosides	Biologically significant ligand;
isopentenyladenosine-5'-diphosphate	C16426	n/a	Organic compounds	Nucleosides, nucleotides, and analogues	Purine nucleotides
isopentenyladenosine-5'-triphosphate	C16424	n/a	Organic compounds	Nucleosides, nucleotides, and analogues	Purine nucleotides
ITP	C00081	ITT	Organic compounds	Nucleosides, nucleotides, and analogues	Purine nucleotides	Biologically significant ligand;
lipoyl-amp	C16238	LAQ	Organic compounds	Nucleosides, nucleotides, and analogues	Purine nucleotides
l-threonylcarbamoyladenylate	C20641	n/a	Organic compounds	Nucleosides, nucleotides, and analogues	Purine nucleotides
methylthioadenosine	C00170	MTA	Organic compounds	Nucleosides, nucleotides, and analogues	5'-deoxyribonucleosides	Biologically significant ligand;
Mo-bis(molybdopteringuaninedinucleotide)	n/a	n/a	Organic compounds	Nucleosides, nucleotides, and analogues	Molybdopterin dinucleotides	UniProt cofactor
n1-(5-phospho-alpha-d-ribosyl)-5,6-dimethylbenzimidazole	C04778	RBZ	Organic compounds	Nucleosides, nucleotides, and analogues	Benzimidazole ribonucleosides and ribonucleotides	Biologically significant ligand;
n2-formyl-n1-(5-phospho-d-ribosyl)glycinamide	C04376	n/a	Organic compounds	Nucleosides, nucleotides, and analogues	Glycinamide ribonucleotides
n6-(1,2-dicarboxyethyl)-amp	C03794	2SA	Organic compounds	Nucleosides, nucleotides, and analogues	Purine nucleotides	Biologically significant ligand;
n6-(delta2-isopentenyl)-adenosine5'-monophosphate	C04713	n/a	Organic compounds	Nucleosides, nucleotides, and analogues	Purine nucleotides
n6-(udp-n-acetyl-alpha-d-muramoyl-l-alanyl-gamma-d-glutamyl)-d-lysine	C19720	n/a	Organic compounds	Nucleosides, nucleotides, and analogues	Pyrimidine nucleotides
n7-methyl-gmp	C03998	n/a	Organic compounds	Nucleosides, nucleotides, and analogues	Purine nucleotides
n7-methylguanosine	C20674	MG7	Organic compounds	Nucleosides, nucleotides, and analogues	Purine nucleosides	Biologically significant ligand;
n-acyl-d-mannosamine6-phosphate	C00686	n/a	Organic compounds	Nucleosides, nucleotides, and analogues	Purine nucleotides
n-acylneuraminate9-phosphate	C01200	n/a	Organic compounds	Nucleosides, nucleotides, and analogues	Pyrimidine nucleotides
NAD	C00003	NAD	Organic compounds	Nucleosides, nucleotides, and analogues	(5'->5')-dinucleotides	Biologically significant ligand; UniProt cofactor
NADH	C00004	NAI	Organic compounds	Nucleosides, nucleotides, and analogues	(5'->5')-dinucleotides	Biologically significant ligand; UniProt cofactor
NADP	C00006	NAP	Organic compounds	Nucleosides, nucleotides, and analogues	(5'->5')-dinucleotides	Biologically significant ligand; UniProt cofactor
NADPH	C00005	NDP	Organic compounds	Nucleosides, nucleotides, and analogues	(5'->5')-dinucleotides	Biologically significant ligand; UniProt cofactor
n-d-ribosylpurine	C15586	n/a	Organic compounds	Nucleosides, nucleotides, and analogues	Purine nucleosides
orotidine5'-phosphate	C01103	OMP	Organic compounds	Nucleosides, nucleotides, and analogues	Pyrimidine nucleotides	Biologically significant ligand;
p1,p3-bis(5'-adenosyl)triphosphate	C06197	BA3	Organic compounds	Nucleosides, nucleotides, and analogues	(5'->5')-dinucleotides
p1,p4-bis(5'-adenosyl)tetraphosphate	C01260	B4P	Organic compounds	Nucleosides, nucleotides, and analogues	(5'->5')-dinucleotides
p1,p4-bis(5'-guanosyl)tetraphosphate	C01261	n/a	Organic compounds	Nucleosides, nucleotides, and analogues	(5'->5')-dinucleotides
p1,p4-bis(5'-uridyl)tetraphosphate	C06198	n/a	Organic compounds	Nucleosides, nucleotides, and analogues	(5'->5')-dinucleotides
p1,p4-bis(5'-xanthosyl)tetraphosphate	C04392	n/a	Organic compounds	Nucleosides, nucleotides, and analogues	(5'->5')-dinucleotides
peptide2-(3-carboxy-3-aminopropyl)-l-histidine	C04441	n/a	Organic compounds	Nucleosides, nucleotides, and analogues	Purine nucleotides
phosphatidylethanolamine	C00350	n/a	Organic compounds	Nucleosides, nucleotides, and analogues	Purine nucleotides
prenylatedfmnh2	C21215	4LU	Organic compounds	Nucleosides, nucleotides, and analogues	Flavin nucleotides	Biologically significant ligand;
propionyladenylate	C05983	n/a	Organic compounds	Nucleosides, nucleotides, and analogues	Purine nucleotides
pseudouridine	C02067	n/a	Organic compounds	Nucleosides, nucleotides, and analogues	Nucleoside and nucleotide analogues
purine2'-deoxyribonucleoside	C20463	n/a	Organic compounds	Nucleosides, nucleotides, and analogues	Purine nucleotides
pyrimidine5'-deoxynucleotide	C08249	n/a	Organic compounds	Nucleosides, nucleotides, and analogues	Pyrimidine nucleotides
pyrimidinenucleoside	C03169	n/a	Organic compounds	Nucleosides, nucleotides, and analogues	Pyrimidine nucleotides
ribonucleoside	C00911	n/a	Organic compounds	Nucleosides, nucleotides, and analogues	Purine nucleosides
s-adenosyl3-(methylthio)propylamine	C01137	S4M	Organic compounds	Nucleosides, nucleotides, and analogues	5'-deoxyribonucleosides	Biologically significant ligand;
s-adenosyl-4-methylthio-2-oxobutanoate	C04425	n/a	Organic compounds	Nucleosides, nucleotides, and analogues	5'-deoxyribonucleosides
s-adenosylhomocysteine	C00021	SAH	Organic compounds	Nucleosides, nucleotides, and analogues	5'-deoxyribonucleosides	Biologically significant ligand;
SAM	C00019	SAM	Organic compounds	Nucleosides, nucleotides, and analogues	5'-deoxyribonucleosides	Biologically significant ligand;
se-adenosyl-l-selenohomocysteine	C05692	SAI	Organic compounds	Nucleosides, nucleotides, and analogues	5'-deoxyribonucleosides
se-adenosylselenomethionine	C05691	EEM	Organic compounds	Nucleosides, nucleotides, and analogues	5'-deoxyribonucleosides
s-methyl-5'-thioinosine	C19787	n/a	Organic compounds	Nucleosides, nucleotides, and analogues	5'-deoxyribonucleosides
thymidine	C00214	THM	Organic compounds	Nucleosides, nucleotides, and analogues	Pyrimidine nucleosides	Biologically significant ligand;
trnacontaining2-thiouridine	C17322	n/a	Organic compounds	Nucleosides, nucleotides, and analogues	Pyrimidine nucleotides
trnacytosine	C17325	n/a	Organic compounds	Nucleosides, nucleotides, and analogues	Pyrimidine nucleotides
UDP	C00015	UDP	Organic compounds	Nucleosides, nucleotides, and analogues	Pyrimidine nucleotides	Biologically significant ligand;
udp-2,4-bis(acetamido)-2,4,6-trideoxy-beta-l-altropyranose	C19971	n/a	Organic compounds	Nucleosides, nucleotides, and analogues	Pyrimidine nucleotides
udp-2-acetamido-2,6-dideoxy-beta-l-arabino-hexos-4-ulose	C19823	n/a	Organic compounds	Nucleosides, nucleotides, and analogues	Pyrimidine nucleotides
udp-2-acetamido-2-deoxy-alpha-d-ribo-hex-3-uluronate	C20395	n/a	Organic compounds	Nucleosides, nucleotides, and analogues	Pyrimidine nucleotides
udp-2-acetamido-3-amino-2,3-dideoxy-alpha-d-glucuronate	C20359	n/a	Organic compounds	Nucleosides, nucleotides, and analogues	Pyrimidine nucleotides
udp-2-acetamido-4-dehydro-2,6-dideoxyglucose	C04613	UD7	Organic compounds	Nucleosides, nucleotides, and analogues	Pyrimidine nucleotides
udp-4-amino-4,6-dideoxy-n-acetyl-beta-l-altrosamine	C19961	UD4	Organic compounds	Nucleosides, nucleotides, and analogues	Pyrimidine nucleotides
udp-6-sulfoquinovose	C11521	USQ	Organic compounds	Nucleosides, nucleotides, and analogues	Pyrimidine nucleotides	Biologically significant ligand;
udp-alpha-d-galactofuranose	C03733	n/a	Organic compounds	Nucleosides, nucleotides, and analogues	Pyrimidine nucleotides
udp-alpha-d-galactopyranose	C00052	UFM	Organic compounds	Nucleosides, nucleotides, and analogues	Pyrimidine nucleotides	Biologically significant ligand;
udp-alpha-d-glucose	C00029	UPG	Organic compounds	Nucleosides, nucleotides, and analogues	Pyrimidine nucleotides	Biologically significant ligand;
udp-beta-l-threo-pentapyranos-4-ulose	C16155	n/a	Organic compounds	Nucleosides, nucleotides, and analogues	Pyrimidine nucleotides
udp-d-glucuronate	C00167	UGA	Organic compounds	Nucleosides, nucleotides, and analogues	Pyrimidine nucleotides	Biologically significant ligand;
udp-d-xylose	C00190	UDX	Organic compounds	Nucleosides, nucleotides, and analogues	Pyrimidine nucleotides	Biologically significant ligand;
udp-l-ara4fn	C16154	n/a	Organic compounds	Nucleosides, nucleotides, and analogues	Pyrimidine nucleotides
udp-l-ara4n	C16153	G3N	Organic compounds	Nucleosides, nucleotides, and analogues	Pyrimidine nucleotides
udp-l-arabinofuranose	C18094	n/a	Organic compounds	Nucleosides, nucleotides, and analogues	Pyrimidine nucleotides
udp-l-arabinose	C00935	UAD	Organic compounds	Nucleosides, nucleotides, and analogues	Pyrimidine nucleotides	Biologically significant ligand;
udp-n,n'-diacetylbacillosamine	C20357	n/a	Organic compounds	Nucleosides, nucleotides, and analogues	Pyrimidine nucleotides
udp-n-acetyl-2-amino-2-deoxy-d-glucuronate	C04573	HP7	Organic compounds	Nucleosides, nucleotides, and analogues	Pyrimidine nucleotides	Biologically significant ligand;
udp-n-acetyl-alpha-d-glucosamine	C00043	UD2	Organic compounds	Nucleosides, nucleotides, and analogues	Pyrimidine nucleotides	Biologically significant ligand;
udp-n-acetyl-alpha-d-glucosamine3'-phosphate	C20245	n/a	Organic compounds	Nucleosides, nucleotides, and analogues	Pyrimidine nucleotides
udp-n-acetyl-alpha-d-muramate	C01050	n/a	Organic compounds	Nucleosides, nucleotides, and analogues	Pyrimidine nucleotides
udp-n-acetyl-alpha-d-muramoyl-l-alanine	C01212	UMA	Organic compounds	Nucleosides, nucleotides, and analogues	Pyrimidine nucleotides	Biologically significant ligand;
udp-n-acetyl-alpha-d-muramoyl-l-alanyl-gamma-d-glutamyl-l-lysine	C05892	UML	Organic compounds	Nucleosides, nucleotides, and analogues	Pyrimidine nucleotides	Biologically significant ligand;
udp-n-acetyl-alpha-d-muramoyl-l-alanyl-gamma-d-glutamyl-meso-2,6-diaminoheptanedioate	C04877	n/a	Organic compounds	Nucleosides, nucleotides, and analogues	Pyrimidine nucleotides
udp-n-acetylbacillosamine	C04630	n/a	Organic compounds	Nucleosides, nucleotides, and analogues	Pyrimidine nucleotides
udp-n-acetyl-d-galactosamine	C00203	n/a	Organic compounds	Nucleosides, nucleotides, and analogues	Pyrimidine nucleotides
udp-n-acetyl-d-mannosamine	C01170	n/a	Organic compounds	Nucleosides, nucleotides, and analogues	Pyrimidine nucleotides
udp-n-acetyl-d-mannosaminouronate	C06240	n/a	Organic compounds	Nucleosides, nucleotides, and analogues	Pyrimidine nucleotides
udp-n-acetylmuramoyl-l-alanyl-d-glutamate	C00692	UAG	Organic compounds	Nucleosides, nucleotides, and analogues	Pyrimidine nucleotides	Biologically significant ligand;
UMP	C00105	U	Organic compounds	Nucleosides, nucleotides, and analogues	Pyrimidine nucleotides	Biologically significant ligand;
uridine	C00299	URI	Organic compounds	Nucleosides, nucleotides, and analogues	Pyrimidine nucleosides	Biologically significant ligand;
UTP	C00075	UTP	Organic compounds	Nucleosides, nucleotides, and analogues	Pyrimidine nucleotides	Biologically significant ligand;
xanthosine	C01762	4UO	Organic compounds	Nucleosides, nucleotides, and analogues	Purine nucleosides	Biologically significant ligand;
xanthosine5'-phosphate	C00655	XMP	Organic compounds	Nucleosides, nucleotides, and analogues	Purine nucleotides	Biologically significant ligand;
XTP	C00700	n/a	Organic compounds	Nucleosides, nucleotides, and analogues	Purine nucleotides
(-)-threo-iso(homo)2-citrate	C16597	n/a	Organic compounds	Organic acids and derivatives	Carboxylic acids and derivatives
(-)-threo-iso(homo)3-citrate	C16600	n/a	Organic compounds	Organic acids and derivatives	Carboxylic acids and derivatives
(1e)-4-oxobut-1-ene-1,2,4-tricarboxylate	C04434	n/a	Organic compounds	Organic acids and derivatives	Carboxylic acids and derivatives
(1e,3e)-4-hydroxybuta-1,3-diene-1,2,4-tricarboxylate	C04324	n/a	Organic compounds	Organic acids and derivatives	Carboxylic acids and derivatives
(1r)-glutathionyl-(2r)-hydroxy-1,2-dihydronaphthalene	C14793	n/a	Organic compounds	Organic acids and derivatives	Carboxylic acids and derivatives
(1r)-hydroxy-(2r)-glutathionyl-1,2-dihydronaphthalene	C14791	n/a	Organic compounds	Organic acids and derivatives	Carboxylic acids and derivatives
(1r,6r)-6-hydroxy-2-succinylcyclohexa-2,4-diene-1-carboxylate	C05817	164	Organic compounds	Organic acids and derivatives	Keto acids and derivatives	Biologically significant ligand;
(1s)-hydroxy-(2s)-glutathionyl-1,2-dihydronaphthalene	C14792	n/a	Organic compounds	Organic acids and derivatives	Carboxylic acids and derivatives
(2r)-3-sulfolactate	C11537	3SL	Organic compounds	Organic acids and derivatives	Hydroxy acids and derivatives	Biologically significant ligand;
(2r)-o-phospho-3-sulfolactate	C11536	n/a	Organic compounds	Organic acids and derivatives	Organic phosphoric acids and derivatives
(2r,4s)-2,4-diaminopentanoate	C03943	n/a	Organic compounds	Organic acids and derivatives	Carboxylic acids and derivatives
(2r,5s)-2,5-diaminohexanoate	C05161	n/a	Organic compounds	Organic acids and derivatives	Carboxylic acids and derivatives
(2s)-2-{[1-(r)-carboxyethyl]amino}pentanoate	C06326	n/a	Organic compounds	Organic acids and derivatives	Carboxylic acids and derivatives
(2s)-2-isopropyl-3-oxosuccinate	C04236	n/a	Organic compounds	Organic acids and derivatives	Keto acids and derivatives
(2s)-2-phospholactate	C19156	PEQ	Organic compounds	Organic acids and derivatives	Organic phosphoric acids and derivatives
(2s,3s)-2,3-dihydro-2,3-dihydroxybenzoate	C04171	n/a	Organic compounds	Organic acids and derivatives	Hydroxy acids and derivatives
(2s,4s)-4-hydroxy-2,3,4,5-tetrahydrodipicolinate	C20258	n/a	Organic compounds	Organic acids and derivatives	Carboxylic acids and derivatives
(2s,5s)-trans-carboxymethylproline	C17366	SSC	Organic compounds	Organic acids and derivatives	Carboxylic acids and derivatives	Biologically significant ligand;
(3s)-3,6-diaminohexanoate	C01142	n/a	Organic compounds	Organic acids and derivatives	Carboxylic acids and derivatives
(3s,5s)-3,5-diaminohexanoate	C01186	n/a	Organic compounds	Organic acids and derivatives	Carboxylic acids and derivatives
(4r)-4-hydroxy-2-oxoglutarate	C05946	n/a	Organic compounds	Organic acids and derivatives	Keto acids and derivatives
(4s)-4,6-dihydroxy-2,5-dioxohexanoate	C04349	n/a	Organic compounds	Organic acids and derivatives	Keto acids and derivatives
(5-formylfuran-3-yl)methylphosphate	C20954	n/a	Organic compounds	Organic acids and derivatives	Organic phosphoric acids and derivatives
(e)-2-(methoxycarbonylmethyl)butenedioate	C11515	T8N	Organic compounds	Organic acids and derivatives	Carboxylic acids and derivatives	Biologically significant ligand;
(e)-3-(methoxycarbonyl)pent-2-enedioate	C11514	n/a	Organic compounds	Organic acids and derivatives	Carboxylic acids and derivatives
(e)-glutaconate	C02214	G9A	Organic compounds	Organic acids and derivatives	Carboxylic acids and derivatives
(r)-(homo)2-citrate	C16583	n/a	Organic compounds	Organic acids and derivatives	Carboxylic acids and derivatives
(r)-(homo)3-citrate	C16598	n/a	Organic compounds	Organic acids and derivatives	Carboxylic acids and derivatives
(r)-1-aminopropan-2-ylphosphate	C04122	n/a	Organic compounds	Organic acids and derivatives	Organic phosphoric acids and derivatives
(r)-2-hydroxyacid	C02489	n/a	Organic compounds	Organic acids and derivatives	Carboxylic acids and derivatives
(r)-2-hydroxybutane-1,2,4-tricarboxylate	C01251	HCA	Organic compounds	Organic acids and derivatives	Carboxylic acids and derivatives
(r)-2-hydroxypropyl-com	C11496	n/a	Organic compounds	Organic acids and derivatives	Organic sulfonic acids and derivatives
(r)-3-((r)-3-hydroxybutanoyloxy)butanoate	C04546	n/a	Organic compounds	Organic acids and derivatives	Hydroxy acids and derivatives
(r)-3-amino-2-methylpropanoate	C01205	n/a	Organic compounds	Organic acids and derivatives	Carboxylic acids and derivatives
(r)-3-hydroxy-3-methyl-2-oxopentanoate	C14463	n/a	Organic compounds	Organic acids and derivatives	Keto acids and derivatives
(r)-3-hydroxybutanoate	C01089	3HR	Organic compounds	Organic acids and derivatives	Hydroxy acids and derivatives	Biologically significant ligand;
(r)-3-ureidoisobutyrate	C21029	n/a	Organic compounds	Organic acids and derivatives	Organic carbonic acids and derivatives
(r)-4-phosphopantoate	C18911	n/a	Organic compounds	Organic acids and derivatives	Organic phosphoric acids and derivatives
(r)-4'-phosphopantothenate	C03492	PAZ	Organic compounds	Organic acids and derivatives	Carboxylic acids and derivatives	Biologically significant ligand;
(r)-5-phosphomevalonate	C01107	n/a	Organic compounds	Organic acids and derivatives	Organic phosphoric acids and derivatives
(s)-2,3,4,5-tetrahydropyridine-2-carboxylate	C00450	n/a	Organic compounds	Organic acids and derivatives	Carboxylic acids and derivatives
(s)-2-aceto-2-hydroxybutanoate	C06006	n/a	Organic compounds	Organic acids and derivatives	Keto acids and derivatives
(s)-2-acetolactate	C06010	X2X	Organic compounds	Organic acids and derivatives	Keto acids and derivatives
(s)-2-aminobutanoate	C02356	n/a	Organic compounds	Organic acids and derivatives	Carboxylic acids and derivatives
(s)-2-aminohexano-6-lactam	C02837	n/a	Organic compounds	Organic acids and derivatives	Carboxylic acids and derivatives
(s)-2-chloropropanoate	C20608	CNR	Organic compounds	Organic acids and derivatives	Carboxylic acids and derivatives
(s)-2-haloacid	C02103	n/a	Organic compounds	Organic acids and derivatives	Carboxylic acids and derivatives
(s)-3-hydroxyisobutyrate	C06001	n/a	Organic compounds	Organic acids and derivatives	Hydroxy acids and derivatives
(s)-3-methyl-2-oxopentanoicacid	C00671	1QQ	Organic compounds	Organic acids and derivatives	Keto acids and derivatives
(s)-4-amino-5-oxopentanoate	C03741	n/a	Organic compounds	Organic acids and derivatives	Carboxylic acids and derivatives
(s)-dihydroorotate	C00337	n/a	Organic compounds	Organic acids and derivatives	Carboxylic acids and derivatives
(s)-malate	C00149	LMR	Organic compounds	Organic acids and derivatives	Hydroxy acids and derivatives	Biologically significant ligand;
(s)-ureidoglycine	C02091	n/a	Organic compounds	Organic acids and derivatives	Carboxylic acids and derivatives
(s)-ureidoglycolate	C00603	n/a	Organic compounds	Organic acids and derivatives	Carboxylic acids and derivatives
(z)-but-1-ene-1,2,4-tricarboxylate	C04002	n/a	Organic compounds	Organic acids and derivatives	Carboxylic acids and derivatives
[heparansulfate]-glucosamine	C17141	n/a	Organic compounds	Organic acids and derivatives	Carboximidic acids and derivatives
1-(1-alkenyl)-sn-glycero-3-phosphate	C15646	n/a	Organic compounds	Organic acids and derivatives	Carboxylic acids and derivatives
1-(1-alkenyl)-sn-glycero-3-phosphoethanolamine	C04635	n/a	Organic compounds	Organic acids and derivatives	Carboxylic acids and derivatives
1,2-diacyl-sn-glycerol3-phosphate	C00416	n/a	Organic compounds	Organic acids and derivatives	Carboxylic acids and derivatives
11beta-hydroxysteroid	C01058	n/a	Organic compounds	Organic acids and derivatives	Hydroxy acids and derivatives
11-oxosteroid	C01985	n/a	Organic compounds	Organic acids and derivatives	Carboxylic acids and derivatives
15h-11,12-eeta	C14781	n/a	Organic compounds	Organic acids and derivatives	Hydroxy acids and derivatives
1-aminocyclopropane-1-carboxylate	C01234	1AC	Organic compounds	Organic acids and derivatives	Carboxylic acids and derivatives	Biologically significant ligand;
1-nitro-5-glutathionyl-6-hydroxy-5,6-dihydronaphthalene	C14806	n/a	Organic compounds	Organic acids and derivatives	Carboxylic acids and derivatives
1-nitro-5-hydroxy-6-glutathionyl-5,6-dihydronaphthalene	C14805	n/a	Organic compounds	Organic acids and derivatives	Carboxylic acids and derivatives
1-nitro-7-glutathionyl-8-hydroxy-7,8-dihydronaphthalene	C14804	n/a	Organic compounds	Organic acids and derivatives	Carboxylic acids and derivatives
1-nitro-7-hydroxy-8-glutathionyl-7,8-dihydronaphthalene	C14803	n/a	Organic compounds	Organic acids and derivatives	Carboxylic acids and derivatives
1-phosphatidyl-1d-myo-inositol3,5-bisphosphate	C11556	n/a	Organic compounds	Organic acids and derivatives	Carboxylic acids and derivatives
1-pyrroline-5-carboxylate	C03912	n/a	Organic compounds	Organic acids and derivatives	Carboxylic acids and derivatives
2-(2-oxopropylthio)ethanesulfonate	C11497	KPC	Organic compounds	Organic acids and derivatives	Organic sulfonic acids and derivatives	Biologically significant ligand;
2-(methylthio)ethanesulfonate	C03920	n/a	Organic compounds	Organic acids and derivatives	Organic sulfonic acids and derivatives
2-(s)-hydroxypropyl-com	C11498	1HS	Organic compounds	Organic acids and derivatives	Organic sulfonic acids and derivatives	Biologically significant ligand;
2-(s-glutathionyl)acetylchloride	C14865	n/a	Organic compounds	Organic acids and derivatives	Carboxylic acids and derivatives
2-(s-glutathionyl)acetylglutathione	C14863	n/a	Organic compounds	Organic acids and derivatives	Carboxylic acids and derivatives
2,3,4,5-tetrahydrodipicolinate	C03972	n/a	Organic compounds	Organic acids and derivatives	Carboxylic acids and derivatives
2,3,5-trichloromaleylacetate	C18243	n/a	Organic compounds	Organic acids and derivatives	Keto acids and derivatives
2,3-diaminopropanoate	C06393	n/a	Organic compounds	Organic acids and derivatives	Carboxylic acids and derivatives
2,3-dihydro-2-s-glutathionyl-3-hydroxybromobenzene	C14848	n/a	Organic compounds	Organic acids and derivatives	Carboxylic acids and derivatives
2,4-dichloro-3-oxoadipate	C18244	n/a	Organic compounds	Organic acids and derivatives	Keto acids and derivatives
2,5-dichloro-4-oxohex-2-enedioate	C12835	n/a	Organic compounds	Organic acids and derivatives	Keto acids and derivatives
2,5-dioxopentanoate	C00433	n/a	Organic compounds	Organic acids and derivatives	Keto acids and derivatives
2-[(2r,5z)-2-carboxy-4-methylthiazol-5(2h)-ylidene]ethylphosphate	C20246	n/a	Organic compounds	Organic acids and derivatives	Carboxylic acids and derivatives
2-[(3s)-3-carboxy-3-(methylamino)propyl]-l-histidine-[translationelongationfactor2]	C04692	n/a	Organic compounds	Organic acids and derivatives	Carboxylic acids and derivatives
2-acetolactate	C00900	n/a	Organic compounds	Organic acids and derivatives	Keto acids and derivatives
2-acyl-sn-glycero-3-phosphocholine	C04233	n/a	Organic compounds	Organic acids and derivatives	Organic phosphoric acids and derivatives
2-amino-1,5-anhydro-2-deoxyglucitol	C21416	n/a	Organic compounds	Organic acids and derivatives	Organic phosphoric acids and derivatives
2-amino-3-oxo-4-phosphonooxybutyrate	C07335	n/a	Organic compounds	Organic acids and derivatives	Carboxylic acids and derivatives
2-aminobut-2-enoate	C17234	n/a	Organic compounds	Organic acids and derivatives	Carboxylic acids and derivatives
2-aminoethylphosphonate	C03557	P7I	Organic compounds	Organic acids and derivatives	Organic phosphonic acids and derivatives
2-aminomalonatesemialdehyde	C11822	n/a	Organic compounds	Organic acids and derivatives	Carboxylic acids and derivatives
2-aminomuconatesemialdehyde	C03824	6OD	Organic compounds	Organic acids and derivatives	Carboxylic acids and derivatives
2-aryl-2-methylmalonate	C06388	n/a	Organic compounds	Organic acids and derivatives	Carboxylic acids and derivatives
2-bromomaleylacetate	C16249	n/a	Organic compounds	Organic acids and derivatives	Keto acids and derivatives
2-chloro-3-oxoadipate	C12836	n/a	Organic compounds	Organic acids and derivatives	Keto acids and derivatives
2-chloro-5-methylmaleylacetate	C18305	n/a	Organic compounds	Organic acids and derivatives	Keto acids and derivatives
2-chloroacrylate	C20609	n/a	Organic compounds	Organic acids and derivatives	Carboxylic acids and derivatives
2-chloromaleylacetate	C06329	n/a	Organic compounds	Organic acids and derivatives	Keto acids and derivatives
2-c-methyl-d-erythritol4-phosphate	C11434	n/a	Organic compounds	Organic acids and derivatives	Organic phosphoric acids and derivatives
2-dechloroethylifosfamide	C16555	n/a	Organic compounds	Organic acids and derivatives	Organic phosphoric acids and derivatives
2-dehydro-3-deoxy-6-phospho-d-galactonate	C01286	n/a	Organic compounds	Organic acids and derivatives	Keto acids and derivatives
2-dehydro-3-deoxy-6-phospho-d-gluconate	C04442	n/a	Organic compounds	Organic acids and derivatives	Keto acids and derivatives
2-dehydro-3-deoxy-d-galactonate	C01216	n/a	Organic compounds	Organic acids and derivatives	Keto acids and derivatives
2-dehydro-3-deoxy-d-gluconate	C00204	KDG	Organic compounds	Organic acids and derivatives	Keto acids and derivatives	Biologically significant ligand;
2-dehydropantoate	C00966	KPL	Organic compounds	Organic acids and derivatives	Keto acids and derivatives	Biologically significant ligand;
2-deoxy-d-gluconate	C02782	n/a	Organic compounds	Organic acids and derivatives	Hydroxy acids and derivatives
2-deoxy-d-ribose5-phosphate	C00673	n/a	Organic compounds	Organic acids and derivatives	Organic phosphoric acids and derivatives
2-hydroxy-3-oxosuccinate	C03459	n/a	Organic compounds	Organic acids and derivatives	Keto acids and derivatives
2-hydroxy-5-(methylthio)-3-oxopent-1-enylphosphate	C15651	n/a	Organic compounds	Organic acids and derivatives	Organic phosphoric acids and derivatives
2-hydroxy-6-ketononatrienedioate	C12624	n/a	Organic compounds	Organic acids and derivatives	Keto acids and derivatives
2-hydroxy-6-oxo-(2'-aminophenyl)-hexa-2,4-dienoate	C08062	n/a	Organic compounds	Organic acids and derivatives	Keto acids and derivatives
2-hydroxy-6-oxo-6-(4'-chlorophenyl)-hexa-2,4-dienoate	C06587	n/a	Organic compounds	Organic acids and derivatives	Keto acids and derivatives
2-hydroxy-6-oxo-6-phenylhexa-2,4-dienoate	C01273	HPZ	Organic compounds	Organic acids and derivatives	Keto acids and derivatives	Biologically significant ligand;
2-hydroxy-6-oxonona-2,4-diene-1,9-dioate	C04479	n/a	Organic compounds	Organic acids and derivatives	Keto acids and derivatives
2-hydroxybutanoicacid	C05984	n/a	Organic compounds	Organic acids and derivatives	Hydroxy acids and derivatives
2-hydroxyglutarate	C02630	n/a	Organic compounds	Organic acids and derivatives	Hydroxy acids and derivatives
2-maleylacetate	C02222	n/a	Organic compounds	Organic acids and derivatives	Keto acids and derivatives
2-methyl-3-oxoadipate	C18307	n/a	Organic compounds	Organic acids and derivatives	Keto acids and derivatives
2-oxo-3-hydroxy-4-phosphobutanoate	C06054	n/a	Organic compounds	Organic acids and derivatives	Keto acids and derivatives
2-oxoadipate	C00322	n/a	Organic compounds	Organic acids and derivatives	Keto acids and derivatives
2-oxobutanoate	C00109	2KT	Organic compounds	Organic acids and derivatives	Keto acids and derivatives	Biologically significant ligand;
2-oxoglutaramate	C00940	n/a	Organic compounds	Organic acids and derivatives	Keto acids and derivatives
2-oxoglutarate	C00026	AKG	Organic compounds	Organic acids and derivatives	Keto acids and derivatives	Biologically significant ligand;
2-phosphoglycolate	C00988	PGA	Organic compounds	Organic acids and derivatives	Organic phosphoric acids and derivatives
2-succinyl-5-enolpyruvyl-6-hydroxy-3-cyclohexene-1-carboxylate	C16519	n/a	Organic compounds	Organic acids and derivatives	Carboxylic acids and derivatives
3-(imidazol-4-yl)-2-oxopropylphosphate	C01267	n/a	Organic compounds	Organic acids and derivatives	Organic phosphoric acids and derivatives
3,4-dihydro-3-hydroxy-4-s-glutathionylbromobenzene	C14847	n/a	Organic compounds	Organic acids and derivatives	Carboxylic acids and derivatives
3,4-dihydroxy-l-phenylalanine	C00355	n/a	Organic compounds	Organic acids and derivatives	Carboxylic acids and derivatives
3-amino-2-oxopropylphosphate	C11638	n/a	Organic compounds	Organic acids and derivatives	Organic phosphoric acids and derivatives
3-chloro-2-methylmaleylacetate	C18310	n/a	Organic compounds	Organic acids and derivatives	Keto acids and derivatives
3-dehydro-l-erythronate	C21612	n/a	Organic compounds	Organic acids and derivatives	Carboxylic acids and derivatives
3-dehydro-l-threonate	C03064	n/a	Organic compounds	Organic acids and derivatives	Keto acids and derivatives
3-dehydropyranoside	C15595	n/a	Organic compounds	Organic acids and derivatives	Organic phosphoric acids and derivatives
3-dehydroquinate	C00944	DQA	Organic compounds	Organic acids and derivatives	Hydroxy acids and derivatives	Biologically significant ligand;
3-hydroxy-2-methylpropanoate	C01188	n/a	Organic compounds	Organic acids and derivatives	Hydroxy acids and derivatives
3-hydroxy-3-methyl-2-oxobutanoicacid	C04181	n/a	Organic compounds	Organic acids and derivatives	Keto acids and derivatives
3-hydroxy-5,9,17-trioxo-4,5,9,10-disecoandrosta-1(10),2-dien-4-oate	C04844	n/a	Organic compounds	Organic acids and derivatives	Keto acids and derivatives
3-hydroxy-5-oxohexanoate	C16272	n/a	Organic compounds	Organic acids and derivatives	Hydroxy acids and derivatives
3-hydroxylidocaine	C16560	n/a	Organic compounds	Organic acids and derivatives	Carboxylic acids and derivatives
3-methyl-2-oxobutanoicacid	C00141	n/a	Organic compounds	Organic acids and derivatives	Keto acids and derivatives
3-oxoadipate	C00846	n/a	Organic compounds	Organic acids and derivatives	Keto acids and derivatives
3-oxoadipateenol-lactone	C03586	n/a	Organic compounds	Organic acids and derivatives	Carboxylic acids and derivatives
3-oxodecanoate	C20714	n/a	Organic compounds	Organic acids and derivatives	Keto acids and derivatives
3-oxo-delta4-steroid	C00619	n/a	Organic compounds	Organic acids and derivatives	Carboxylic acids and derivatives
3-oxosteroid	C01876	n/a	Organic compounds	Organic acids and derivatives	Carboxylic acids and derivatives
3-phospho-d-glyceroylphosphate	C00236	X15	Organic compounds	Organic acids and derivatives	Organic phosphoric acids and derivatives	Biologically significant ligand;
3'-ribonucleotide	C02508	n/a	Organic compounds	Organic acids and derivatives	Carboxylic acids and derivatives
3-sulfino-l-alanine	C00606	n/a	Organic compounds	Organic acids and derivatives	Carboxylic acids and derivatives
3-sulfinylpyruvate	C05527	n/a	Organic compounds	Organic acids and derivatives	Keto acids and derivatives
3-sulfopyruvate	C05528	SPV	Organic compounds	Organic acids and derivatives	Keto acids and derivatives
3-ureidopropanoate	C02642	URP	Organic compounds	Organic acids and derivatives	Organic carbonic acids and derivatives	Biologically significant ligand;
4-(l-alanin-3-yl)-2-hydroxy-cis,cis-muconate6-semialdehyde	C04796	n/a	Organic compounds	Organic acids and derivatives	Carboxylic acids and derivatives
4,5-dihydro-4-hydroxy-5-s-glutathionyl-benzo[a]pyrene	C14855	n/a	Organic compounds	Organic acids and derivatives	Carboxylic acids and derivatives
4-acetamidobutanoate	C02946	n/a	Organic compounds	Organic acids and derivatives	Carboxylic acids and derivatives
4-amino-1-piperidinecarboxylicacid	C16837	n/a	Organic compounds	Organic acids and derivatives	Carboxylic acids and derivatives
4-aminobutanoate	C00334	ABU	Organic compounds	Organic acids and derivatives	Carboxylic acids and derivatives	Biologically significant ligand;
4-carboxy-2-hydroxy-6-methoxy-6-oxohexa-2,4-dienoate	C18345	n/a	Organic compounds	Organic acids and derivatives	Carboxylic acids and derivatives
4-carboxy-4-hydroxy-2-oxoadipate	C04115	n/a	Organic compounds	Organic acids and derivatives	Carboxylic acids and derivatives
4-glutathionylcyclophosphamide	C11583	n/a	Organic compounds	Organic acids and derivatives	Carboxylic acids and derivatives
4-guanidinobutanoate	C01035	n/a	Organic compounds	Organic acids and derivatives	Carboxylic acids and derivatives
4-hydroxy-l-threonine	C06056	n/a	Organic compounds	Organic acids and derivatives	Carboxylic acids and derivatives
4-methyl-2-oxopentanoate	C00233	COI	Organic compounds	Organic acids and derivatives	Keto acids and derivatives	Biologically significant ligand;
4-methylaminobutyrate	C15987	n/a	Organic compounds	Organic acids and derivatives	Carboxylic acids and derivatives
4-nitrophenylphosphate	C03360	4NP	Organic compounds	Organic acids and derivatives	Organic phosphoric acids and derivatives	Biologically significant ligand;
4-phospho-l-aspartate	C03082	n/a	Organic compounds	Organic acids and derivatives	Carboxylic acids and derivatives
4-phosphooxy-l-threonine	C06055	4TP	Organic compounds	Organic acids and derivatives	Carboxylic acids and derivatives	Biologically significant ligand;
5-(methylthio)-2,3-dioxopentylphosphate	C15650	n/a	Organic compounds	Organic acids and derivatives	Organic phosphoric acids and derivatives
5-(n7-methyl5-triphosphoguanosine)-2'-o-methyladenosine-[mrna]	C01972	n/a	Organic compounds	Organic acids and derivatives	Carboxylic acids and derivatives
5-amino-2-oxopentanoicacid	C01110	n/a	Organic compounds	Organic acids and derivatives	Keto acids and derivatives
5-amino-5-deoxy-3-dehydroshikimate	C12108	n/a	Organic compounds	Organic acids and derivatives	Carboxylic acids and derivatives
5-aminolevulinate	C00430	n/a	Organic compounds	Organic acids and derivatives	Carboxylic acids and derivatives
5-aminopentanamide	C00990	n/a	Organic compounds	Organic acids and derivatives	Carboxylic acids and derivatives
5-dehydro-2-deoxy-d-gluconate	C06892	n/a	Organic compounds	Organic acids and derivatives	Hydroxy acids and derivatives
5-dehydro-d-gluconate	C01062	n/a	Organic compounds	Organic acids and derivatives	Hydroxy acids and derivatives
5-formyltetrahydrofolate	C03479	FFO	Organic compounds	Organic acids and derivatives	Carboxylic acids and derivatives
5-guanidino-2-oxopentanoate	C03771	n/a	Organic compounds	Organic acids and derivatives	Keto acids and derivatives
5-methylmaleylacetate	C18306	n/a	Organic compounds	Organic acids and derivatives	Keto acids and derivatives
5-oxoprolyl-peptide	C02805	n/a	Organic compounds	Organic acids and derivatives	Carboxylic acids and derivatives
6-amino-2-oxohexanoate	C03239	n/a	Organic compounds	Organic acids and derivatives	Keto acids and derivatives
6-hydroxyhexanoicacid	C06103	n/a	Organic compounds	Organic acids and derivatives	Hydroxy acids and derivatives
7,8-dihydro-7-hydroxy-8-s-glutathionyl-benzo[a]pyrene	C14856	n/a	Organic compounds	Organic acids and derivatives	Carboxylic acids and derivatives
7,8-dihydropteroylglutamate	C00415	DHF	Organic compounds	Organic acids and derivatives	Carboxylic acids and derivatives	Biologically significant ligand;
a47934	C12016	n/a	Organic compounds	Organic acids and derivatives	Carboxylic acids and derivatives
acetamide	C06244	ACM	Organic compounds	Organic acids and derivatives	Carboximidic acids and derivatives
acetate	C00033	ACT	Organic compounds	Organic acids and derivatives	Carboxylic acids and derivatives	Biologically significant ligand;
aceticester	C01883	n/a	Organic compounds	Organic acids and derivatives	Carboxylic acids and derivatives
acetoacetate	C00164	AAE	Organic compounds	Organic acids and derivatives	Keto acids and derivatives	Biologically significant ligand;
acetylhydrazine	C07447	n/a	Organic compounds	Organic acids and derivatives	Carboxylic acids and derivatives
acetylphosphate	C00227	UVW	Organic compounds	Organic acids and derivatives	Organic phosphoric acids and derivatives	Biologically significant ligand;
acrylamide	C01659	n/a	Organic compounds	Organic acids and derivatives	Carboximidic acids and derivatives
acrylicacid	C00511	n/a	Organic compounds	Organic acids and derivatives	Carboxylic acids and derivatives
aflatoxinb1exo-8,9-epoxide-gsh	C11278	n/a	Organic compounds	Organic acids and derivatives	Carboxylic acids and derivatives
aldehyde	C00071	n/a	Organic compounds	Organic acids and derivatives	Carboxylic acids and derivatives
allantoate	C00499	1AL	Organic compounds	Organic acids and derivatives	Carboxylic acids and derivatives	Biologically significant ligand;
alpha-aminoacid	C05167	n/a	Organic compounds	Organic acids and derivatives	Carboxylic acids and derivatives
alpha-d-xylose1-phosphate	C03737	n/a	Organic compounds	Organic acids and derivatives	Organic phosphoric acids and derivatives
alpha-fluoro-beta-alanine	C16632	n/a	Organic compounds	Organic acids and derivatives	Carboxylic acids and derivatives
alpha-fluoro-beta-ureidopropionicacid	C16631	n/a	Organic compounds	Organic acids and derivatives	Carboxylic acids and derivatives
bacilysin	C20942	n/a	Organic compounds	Organic acids and derivatives	Carboxylic acids and derivatives
benzylpenicilloicacid	C16672	n/a	Organic compounds	Organic acids and derivatives	Carboxylic acids and derivatives
beta-alanine	C00099	BAL	Organic compounds	Organic acids and derivatives	Carboxylic acids and derivatives	Biologically significant ligand;
beta-alanyl-n(pi)-methyl-l-histidine	C01262	n/a	Organic compounds	Organic acids and derivatives	Peptidomimetics
betaine	C00719	BET	Organic compounds	Organic acids and derivatives	Carboxylic acids and derivatives	Biologically significant ligand;
beta-l-arabinose1-phosphate	C03906	X1P	Organic compounds	Organic acids and derivatives	Organic phosphoric acids and derivatives
bis(glutathionyl)spermine	C16563	n/a	Organic compounds	Organic acids and derivatives	Carboxylic acids and derivatives
bis(glutathionyl)sperminedisulfide	C16564	n/a	Organic compounds	Organic acids and derivatives	Carboxylic acids and derivatives
carbamate	C01563	n/a	Organic compounds	Organic acids and derivatives	Organic carbonic acids and derivatives
carbamoylphosphate	C00169	CP	Organic compounds	Organic acids and derivatives	Organic phosphoric acids and derivatives	Biologically significant ligand;
carboxyphosphate	C20969	n/a	Organic compounds	Organic acids and derivatives	Organic phosphoric acids and derivatives
carnosine	C00386	n/a	Organic compounds	Organic acids and derivatives	Peptidomimetics
cephalosporinc	C00916	CSC	Organic compounds	Organic acids and derivatives	Carboxylic acids and derivatives	Biologically significant ligand;
chloroaceticacid	C06755	n/a	Organic compounds	Organic acids and derivatives	Carboxylic acids and derivatives
chloroorienticinb	C20721	n/a	Organic compounds	Organic acids and derivatives	Carboxylic acids and derivatives
cholinesulfate	C00919	n/a	Organic compounds	Organic acids and derivatives	Organic sulfuric acids and derivatives
chorismate	C00251	n/a	Organic compounds	Organic acids and derivatives	Carboxylic acids and derivatives
cis-(homo)2-aconitate	C20581	n/a	Organic compounds	Organic acids and derivatives	Carboxylic acids and derivatives
cis-(homo)3-aconitate	C20582	n/a	Organic compounds	Organic acids and derivatives	Carboxylic acids and derivatives
cis-3-chloroacrylicacid	C06615	n/a	Organic compounds	Organic acids and derivatives	Carboxylic acids and derivatives
cis-4-hydroxy-d-proline	C03440	n/a	Organic compounds	Organic acids and derivatives	Carboxylic acids and derivatives
cis-acetylacrylate	C07091	n/a	Organic compounds	Organic acids and derivatives	Keto acids and derivatives
cis-aconitate	C00417	TRA	Organic compounds	Organic acids and derivatives	Carboxylic acids and derivatives	Biologically significant ligand;
citrate	C00158	CIT	Organic compounds	Organic acids and derivatives	Carboxylic acids and derivatives	Biologically significant ligand;
coenzymef420	C00876	F42	Organic compounds	Organic acids and derivatives	Carboxylic acids and derivatives	Biologically significant ligand;
CoM	C03576	COM	Organic compounds	Organic acids and derivatives	Organic sulfonic acids and derivatives	Biologically significant ligand;
creatine	C00300	CRN	Organic compounds	Organic acids and derivatives	Carboxylic acids and derivatives	Biologically significant ligand;
creatinine	C00791	n/a	Organic compounds	Organic acids and derivatives	Carboxylic acids and derivatives
cyclo(l-leucyl-l-leucyl)	C20514	n/a	Organic compounds	Organic acids and derivatives	Carboxylic acids and derivatives
cyclo(l-leucyl-l-phenylalanyl)	C20519	n/a	Organic compounds	Organic acids and derivatives	Carboxylic acids and derivatives
cyclo(l-tyrosyl-l-tyrosyl)	C20516	n/a	Organic compounds	Organic acids and derivatives	Carboxylic acids and derivatives
cys-gly	C01419	n/a	Organic compounds	Organic acids and derivatives	Carboxylic acids and derivatives
cystathionine	C00542	n/a	Organic compounds	Organic acids and derivatives	Carboxylic acids and derivatives
d-2-aminohexano-6-lactam	C05328	n/a	Organic compounds	Organic acids and derivatives	Carboxylic acids and derivatives
d-4-hydroxyphenylglycine	C03493	n/a	Organic compounds	Organic acids and derivatives	Carboxylic acids and derivatives
d-alanine	C00133	DAL	Organic compounds	Organic acids and derivatives	Carboxylic acids and derivatives	Biologically significant ligand;
d-alanyl-(r)-lactate	C19694	n/a	Organic compounds	Organic acids and derivatives	Carboxylic acids and derivatives
d-alanyl-d-alanine	C00993	n/a	Organic compounds	Organic acids and derivatives	Carboxylic acids and derivatives
d-allo-isoleucine	C21092	n/a	Organic compounds	Organic acids and derivatives	Carboxylic acids and derivatives
d-aminoacid	C00405	n/a	Organic compounds	Organic acids and derivatives	Carboxylic acids and derivatives
d-arginine	C00792	n/a	Organic compounds	Organic acids and derivatives	Carboxylic acids and derivatives
d-aspartate	C00402	DAS	Organic compounds	Organic acids and derivatives	Carboxylic acids and derivatives
d-cysteine	C00793	DCY	Organic compounds	Organic acids and derivatives	Carboxylic acids and derivatives
dechloroethylcyclophosphamide	C16550	n/a	Organic compounds	Organic acids and derivatives	Organic phosphoric acids and derivatives
dehydroalanine	C02218	DHA	Organic compounds	Organic acids and derivatives	Carboxylic acids and derivatives	Biologically significant ligand;
delta1-pyrroline-5-carboxylate	C04322	n/a	Organic compounds	Organic acids and derivatives	Carboxylic acids and derivatives
desulfo-a47934	C20759	n/a	Organic compounds	Organic acids and derivatives	Carboxylic acids and derivatives
desvancosaminyl-vancomycin	C20720	n/a	Organic compounds	Organic acids and derivatives	Carboxylic acids and derivatives
d-fireflyluciferin	C02740	n/a	Organic compounds	Organic acids and derivatives	Carboxylic acids and derivatives
d-glutamate	C00217	DGL	Organic compounds	Organic acids and derivatives	Carboxylic acids and derivatives	Biologically significant ligand;
d-glutamine	C00819	n/a	Organic compounds	Organic acids and derivatives	Carboxylic acids and derivatives
d-glycero-alpha-d-manno-heptose7-phosphate	C19878	M7B	Organic compounds	Organic acids and derivatives	Organic phosphoric acids and derivatives	Biologically significant ligand;
d-glycero-beta-d-manno-heptose7-phosphate	C07836	n/a	Organic compounds	Organic acids and derivatives	Organic phosphoric acids and derivatives
d-glycero-d-manno-heptose7-phosphate	C19882	n/a	Organic compounds	Organic acids and derivatives	Organic phosphoric acids and derivatives
dipyrromethane	n/a	n/a	Organic compounds	Organic acids and derivatives	Carboxylic acids and derivatives	UniProt cofactor
d-lysine	C00739	n/a	Organic compounds	Organic acids and derivatives	Carboxylic acids and derivatives
d-ornithine	C00515	n/a	Organic compounds	Organic acids and derivatives	Carboxylic acids and derivatives
d-proline	C00763	n/a	Organic compounds	Organic acids and derivatives	Carboxylic acids and derivatives
d-serine	C00740	n/a	Organic compounds	Organic acids and derivatives	Carboxylic acids and derivatives
enterochelin	C05821	EB4	Organic compounds	Organic acids and derivatives	Peptidomimetics
ethanolaminephosphate	C00346	OPE	Organic compounds	Organic acids and derivatives	Organic phosphoric acids and derivatives
fattyacid	C00162	n/a	Organic compounds	Organic acids and derivatives	Hydroxy acids and derivatives
fluoroacetate	C06108	FAH	Organic compounds	Organic acids and derivatives	Carboxylic acids and derivatives	Biologically significant ligand;
folate	C00504	FOL	Organic compounds	Organic acids and derivatives	Carboxylic acids and derivatives	Biologically significant ligand;
formamide	C00488	ARF	Organic compounds	Organic acids and derivatives	Carboximidic acids and derivatives
formate	C00058	FMT	Organic compounds	Organic acids and derivatives	Carboxylic acids and derivatives	Biologically significant ligand;
fumarate	C00122	FUM	Organic compounds	Organic acids and derivatives	Carboxylic acids and derivatives	Biologically significant ligand;
gamma-l-glutamyl-l-2-aminobutyrate	C21015	n/a	Organic compounds	Organic acids and derivatives	Carboxylic acids and derivatives
gamma-l-glutamyl-l-cysteine	C00669	3GC	Organic compounds	Organic acids and derivatives	Carboxylic acids and derivatives	Biologically significant ligand;
glutamate	C00302	n/a	Organic compounds	Organic acids and derivatives	Carboxylic acids and derivatives
Glutathione	C00051	GSH	Organic compounds	Organic acids and derivatives	Carboxylic acids and derivatives	Biologically significant ligand;
glutathioneamide	C19689	n/a	Organic compounds	Organic acids and derivatives	Carboxylic acids and derivatives
glutathioneamidedisulfide	C19690	n/a	Organic compounds	Organic acids and derivatives	Carboxylic acids and derivatives
glutathionedisulfide	C00127	GDS	Organic compounds	Organic acids and derivatives	Carboxylic acids and derivatives	Biologically significant ligand;
glutathioneepisulfoniumion	C14874	n/a	Organic compounds	Organic acids and derivatives	Carboxylic acids and derivatives
glutathionylaminopropylcadaverine	C16566	n/a	Organic compounds	Organic acids and derivatives	Carboxylic acids and derivatives
glutathionylspermidine	C05730	n/a	Organic compounds	Organic acids and derivatives	Carboxylic acids and derivatives
glutathionylspermine	C16562	n/a	Organic compounds	Organic acids and derivatives	Carboxylic acids and derivatives
glycine	C00037	GLY	Organic compounds	Organic acids and derivatives	Carboxylic acids and derivatives	Biologically significant ligand;
glycolate	C00160	GOA	Organic compounds	Organic acids and derivatives	Hydroxy acids and derivatives	Biologically significant ligand;
glyoxylate	C00048	GLV	Organic compounds	Organic acids and derivatives	Carboxylic acids and derivatives	Biologically significant ligand;
guanidinoacetate	C00581	NMG	Organic compounds	Organic acids and derivatives	Carboxylic acids and derivatives	Biologically significant ligand;
H2CO3	C01353	n/a	Organic compounds	Organic acids and derivatives	Organic carbonic acids and derivatives
haloacetate	C01812	BXA	Organic compounds	Organic acids and derivatives	Keto acids and derivatives	Biologically significant ligand;
HCO3-	C00288	BCT	Organic compounds	Organic acids and derivatives	Organic carbonic acids and derivatives	Biologically significant ligand;
heparansulfatealpha-d-glucosaminide	C04384	n/a	Organic compounds	Organic acids and derivatives	Carboximidic acids and derivatives
hercynine	C05575	n/a	Organic compounds	Organic acids and derivatives	Carboxylic acids and derivatives
histone-l-lysine	C02415	n/a	Organic compounds	Organic acids and derivatives	Carboxylic acids and derivatives
homocarnosine	C00884	n/a	Organic compounds	Organic acids and derivatives	Peptidomimetics
homoisocitrate	C05662	48Y	Organic compounds	Organic acids and derivatives	Carboxylic acids and derivatives	Biologically significant ligand;
homotrypanothione	C16567	n/a	Organic compounds	Organic acids and derivatives	Carboxylic acids and derivatives
homotrypanothionedisulfide	C16568	n/a	Organic compounds	Organic acids and derivatives	Carboxylic acids and derivatives
hydroxyproline	C01157	n/a	Organic compounds	Organic acids and derivatives	Carboxylic acids and derivatives
hydroxypyruvate	C00168	3PY	Organic compounds	Organic acids and derivatives	Hydroxy acids and derivatives
hydroxyurea	C07044	n/a	Organic compounds	Organic acids and derivatives	Carboximidic acids and derivatives
hypotaurine	C00519	n/a	Organic compounds	Organic acids and derivatives	Sulfinic acids and derivatives
iminoerythrose4-phosphate	C12215	n/a	Organic compounds	Organic acids and derivatives	Organic phosphoric acids and derivatives
iminoglycine	C15809	n/a	Organic compounds	Organic acids and derivatives	Carboxylic acids and derivatives
iminosuccinate	C05840	n/a	Organic compounds	Organic acids and derivatives	Carboxylic acids and derivatives
isochorismate	C00885	ISC	Organic compounds	Organic acids and derivatives	Hydroxy acids and derivatives	Biologically significant ligand;
isocitrate	C00311	ICT	Organic compounds	Organic acids and derivatives	Carboxylic acids and derivatives	Biologically significant ligand;
l-1-pyrroline-3-hydroxy-5-carboxylate	C04281	n/a	Organic compounds	Organic acids and derivatives	Carboxylic acids and derivatives
l-2-amino-3-oxobutanoicacid	C03508	n/a	Organic compounds	Organic acids and derivatives	Carboxylic acids and derivatives
l-2-amino-6-oxoheptanedioate	C03871	n/a	Organic compounds	Organic acids and derivatives	Carboxylic acids and derivatives
l-2-aminoadipate	C00956	UN1	Organic compounds	Organic acids and derivatives	Carboxylic acids and derivatives	Biologically significant ligand;
l-2-aminoadipate6-semialdehyde	C04076	n/a	Organic compounds	Organic acids and derivatives	Carboxylic acids and derivatives
l-3,4-dihydroxybutan-2-one4-phosphate	C15556	n/a	Organic compounds	Organic acids and derivatives	Organic phosphoric acids and derivatives
l-3-aminoisobutanoate	C03284	BIB	Organic compounds	Organic acids and derivatives	Carboxylic acids and derivatives
l-4-hydroxyglutamatesemialdehyde	C05938	n/a	Organic compounds	Organic acids and derivatives	Carboxylic acids and derivatives
l-alanine	C00041	ALA	Organic compounds	Organic acids and derivatives	Carboxylic acids and derivatives	Biologically significant ligand;
l-alanyl-gamma-d-glutamyl-meso-2,6-diaminoheptanedioate	C20925	MHI	Organic compounds	Organic acids and derivatives	Carboxylic acids and derivatives
l-allo-threonine	C05519	n/a	Organic compounds	Organic acids and derivatives	Carboxylic acids and derivatives
l-anticapsin	C20941	n/a	Organic compounds	Organic acids and derivatives	Carboxylic acids and derivatives
l-arginine	C00062	ARG	Organic compounds	Organic acids and derivatives	Carboxylic acids and derivatives	Biologically significant ligand;
l-arginyl-l-aminoacid	C21099	n/a	Organic compounds	Organic acids and derivatives	Carboxylic acids and derivatives
l-arogenate	C00826	n/a	Organic compounds	Organic acids and derivatives	Carboxylic acids and derivatives
l-asp(4-l-arg)	C19843	n/a	Organic compounds	Organic acids and derivatives	Peptidomimetics
l-asparagine	C00152	ASN	Organic compounds	Organic acids and derivatives	Carboxylic acids and derivatives	Biologically significant ligand;
l-aspartate	C00049	ASP	Organic compounds	Organic acids and derivatives	Carboxylic acids and derivatives	Biologically significant ligand;
l-aspartate4-semialdehyde	C00441	AS2	Organic compounds	Organic acids and derivatives	Carboxylic acids and derivatives	Biologically significant ligand;
l-citrulline	C00327	CIR	Organic compounds	Organic acids and derivatives	Carboxylic acids and derivatives	Biologically significant ligand;
l-cystathionine	C02291	n/a	Organic compounds	Organic acids and derivatives	Carboxylic acids and derivatives
l-cysteate	C00506	n/a	Organic compounds	Organic acids and derivatives	Carboxylic acids and derivatives
l-cysteine	C00097	CYS	Organic compounds	Organic acids and derivatives	Carboxylic acids and derivatives	Biologically significant ligand;
l-cysteines-conjugate	C05726	n/a	Organic compounds	Organic acids and derivatives	Carboxylic acids and derivatives
l-cystine	C00491	n/a	Organic compounds	Organic acids and derivatives	Carboxylic acids and derivatives
l-erythro-4-hydroxyglutamate	C05947	n/a	Organic compounds	Organic acids and derivatives	Carboxylic acids and derivatives
l-glutamate	C00025	FGA	Organic compounds	Organic acids and derivatives	Carboxylic acids and derivatives	Biologically significant ligand;
l-glutamate5-semialdehyde	C01165	n/a	Organic compounds	Organic acids and derivatives	Carboxylic acids and derivatives
l-glutamine	C00064	DGN	Organic compounds	Organic acids and derivatives	Carboxylic acids and derivatives	Biologically significant ligand;
l-glutamyl5-phosphate	C03287	RGP	Organic compounds	Organic acids and derivatives	Carboxylic acids and derivatives	Biologically significant ligand;
l-gulonate	C00800	n/a	Organic compounds	Organic acids and derivatives	Hydroxy acids and derivatives
l-histidine	C00135	HIS	Organic compounds	Organic acids and derivatives	Carboxylic acids and derivatives	Biologically significant ligand;
l-histidinolphosphate	C01100	HSA	Organic compounds	Organic acids and derivatives	Organic phosphoric acids and derivatives	Biologically significant ligand;
l-homocysteine	C00155	HCS	Organic compounds	Organic acids and derivatives	Carboxylic acids and derivatives
l-homoserine	C00263	HSE	Organic compounds	Organic acids and derivatives	Carboxylic acids and derivatives	Biologically significant ligand;
l-isoleucine	C00407	n/a	Organic compounds	Organic acids and derivatives	Carboxylic acids and derivatives
ll-2,6-diaminoheptanedioate	C00666	API	Organic compounds	Organic acids and derivatives	Carboxylic acids and derivatives
l-leucine	C00123	LEU	Organic compounds	Organic acids and derivatives	Carboxylic acids and derivatives	Biologically significant ligand;
l-lysine	C00047	LYS	Organic compounds	Organic acids and derivatives	Carboxylic acids and derivatives	Biologically significant ligand;
l-methionine	C00073	MET	Organic compounds	Organic acids and derivatives	Carboxylic acids and derivatives	Biologically significant ligand;
l-norvaline	C01826	n/a	Organic compounds	Organic acids and derivatives	Carboxylic acids and derivatives
l-ornithine	C00077	ORN	Organic compounds	Organic acids and derivatives	Carboxylic acids and derivatives	Biologically significant ligand;
l-phenylalanine	C00079	PHE	Organic compounds	Organic acids and derivatives	Carboxylic acids and derivatives	Biologically significant ligand;
l-proline	C00148	DPR	Organic compounds	Organic acids and derivatives	Carboxylic acids and derivatives	Biologically significant ligand;
l-selenocystathionine	C05699	n/a	Organic compounds	Organic acids and derivatives	Carboxylic acids and derivatives
l-selenocysteine	C05688	n/a	Organic compounds	Organic acids and derivatives	Carboxylic acids and derivatives
l-selenomethionine	C05335	MSE	Organic compounds	Organic acids and derivatives	Carboxylic acids and derivatives	Biologically significant ligand;
l-serine	C00065	SER	Organic compounds	Organic acids and derivatives	Carboxylic acids and derivatives	Biologically significant ligand;
l-threo-3-methylaspartate	C03618	2AS	Organic compounds	Organic acids and derivatives	Carboxylic acids and derivatives
l-threonine	C00188	THR	Organic compounds	Organic acids and derivatives	Carboxylic acids and derivatives	Biologically significant ligand;
l-threonineo-3-phosphate	C12147	TPO	Organic compounds	Organic acids and derivatives	Carboxylic acids and derivatives	Biologically significant ligand;
l-tyrosine	C00082	TYR	Organic compounds	Organic acids and derivatives	Carboxylic acids and derivatives	Biologically significant ligand;
l-valine	C00183	DVA	Organic compounds	Organic acids and derivatives	Carboxylic acids and derivatives
m7g(5')pppm6am-mrna	C04833	n/a	Organic compounds	Organic acids and derivatives	Carboxylic acids and derivatives
maleate	C01384	MAE	Organic compounds	Organic acids and derivatives	Carboxylic acids and derivatives	Biologically significant ligand;
Menaquinone	C00828	n/a	Organic compounds	Organic acids and derivatives	Carboxylic acids and derivatives
mercaptopyruvate	C00957	n/a	Organic compounds	Organic acids and derivatives	Keto acids and derivatives
meso-2,6-diaminoheptanedioate	C00680	n/a	Organic compounds	Organic acids and derivatives	Carboxylic acids and derivatives
methylmalonate	C02170	DXX	Organic compounds	Organic acids and derivatives	Carboxylic acids and derivatives
methylphosphonate	C20396	GB	Organic compounds	Organic acids and derivatives	Organic phosphonic acids and derivatives
monoacylglycerol	C01885	n/a	Organic compounds	Organic acids and derivatives	Hydroxy acids and derivatives
monoethylglycinexylidide	C16561	n/a	Organic compounds	Organic acids and derivatives	Carboxylic acids and derivatives
n-((r)-pantothenoyl)-l-cysteine	C04079	n/a	Organic compounds	Organic acids and derivatives	Peptidomimetics
n-(l-arginino)succinate	C03406	AS1	Organic compounds	Organic acids and derivatives	Carboxylic acids and derivatives	Biologically significant ligand;
n(omega)-hydroxyarginine	C05933	n/a	Organic compounds	Organic acids and derivatives	Carboxylic acids and derivatives
n(pi)-methyl-l-histidine	C01152	n/a	Organic compounds	Organic acids and derivatives	Carboxylic acids and derivatives
n,n-diethylglycine	C16647	n/a	Organic compounds	Organic acids and derivatives	Carboxylic acids and derivatives
n,n-dimethylglycine	C01026	DMG	Organic compounds	Organic acids and derivatives	Carboxylic acids and derivatives
n,n-dimethylhistidine	C04259	AVI	Organic compounds	Organic acids and derivatives	Carboxylic acids and derivatives	Biologically significant ligand;
n-[(r)-4'-phosphopantothenoyl]-l-cysteine	C04352	n/a	Organic compounds	Organic acids and derivatives	Peptidomimetics
n1,n8-bis(glutathionyl)spermidine	C02090	n/a	Organic compounds	Organic acids and derivatives	Carboxylic acids and derivatives
n1-acetylspermidine	C00612	n/a	Organic compounds	Organic acids and derivatives	Carboximidic acids and derivatives
n1-acetylspermine	C02567	SP5	Organic compounds	Organic acids and derivatives	Carboxylic acids and derivatives	Biologically significant ligand;
n2-(2-carboxyethyl)-l-arginine	C06655	CMA	Organic compounds	Organic acids and derivatives	Carboxylic acids and derivatives	Biologically significant ligand;
n2-(d-1-carboxyethyl)-l-arginine	C04137	n/a	Organic compounds	Organic acids and derivatives	Carboxylic acids and derivatives
n2-succinyl-l-ornithine	C03415	SUO	Organic compounds	Organic acids and derivatives	Carboxylic acids and derivatives	Biologically significant ligand;
n3-acetyl-2-deoxystreptamineantibiotic	C04504	n/a	Organic compounds	Organic acids and derivatives	Carboxylic acids and derivatives
n5-hydroxy-l-ornithine	C20850	ONH	Organic compounds	Organic acids and derivatives	Carboxylic acids and derivatives	Biologically significant ligand;
n6-(l-1,3-dicarboxypropyl)-l-lysine	C00449	SHR	Organic compounds	Organic acids and derivatives	Carboxylic acids and derivatives	Biologically significant ligand;
n8-acetylspermidine	C01029	Q9C	Organic compounds	Organic acids and derivatives	Carboximidic acids and derivatives
n-acetylaspartylglutamate	C12270	n/a	Organic compounds	Organic acids and derivatives	Carboxylic acids and derivatives
n-acetylaspartylglutamylglutamate	C20776	n/a	Organic compounds	Organic acids and derivatives	Carboxylic acids and derivatives
n-acetyl-l-aspartate	C01042	n/a	Organic compounds	Organic acids and derivatives	Carboxylic acids and derivatives
n-acetyl-l-citrulline	C15532	OLN	Organic compounds	Organic acids and derivatives	Carboxylic acids and derivatives	Biologically significant ligand;
n-acetyl-l-glutamate	C00624	NLG	Organic compounds	Organic acids and derivatives	Carboxylic acids and derivatives	Biologically significant ligand;
n-acetyl-l-glutamate5-semialdehyde	C01250	n/a	Organic compounds	Organic acids and derivatives	Carboxylic acids and derivatives
n-acetyl-l-glutamyl5-phosphate	C04133	X2W	Organic compounds	Organic acids and derivatives	Carboxylic acids and derivatives	Biologically significant ligand;
n-acetylornithine	C00437	AOR	Organic compounds	Organic acids and derivatives	Carboxylic acids and derivatives	Biologically significant ligand;
n-acetylputrescine	C02714	n/a	Organic compounds	Organic acids and derivatives	Carboximidic acids and derivatives
n-acyl-aromatic-l-aminoacid	C20735	n/a	Organic compounds	Organic acids and derivatives	Carboxylic acids and derivatives
n-acyl-d-mannosaminolactone	C03792	n/a	Organic compounds	Organic acids and derivatives	Carboxylic acids and derivatives
n-acyl-l-aspartate	C02715	n/a	Organic compounds	Organic acids and derivatives	Organic carbonic acids and derivatives
nalpha-methylhistidine	C03298	n/a	Organic compounds	Organic acids and derivatives	Carboxylic acids and derivatives
n-carbamoyl-2-oxoglycine	C00802	n/a	Organic compounds	Organic acids and derivatives	Carboxylic acids and derivatives
n-carbamoyl-l-aspartate	C00438	NCD	Organic compounds	Organic acids and derivatives	Carboxylic acids and derivatives	Biologically significant ligand;
n-carbamoylputrescine	C00436	n/a	Organic compounds	Organic acids and derivatives	Carboximidic acids and derivatives
n-carbamoylsarcosine	C01043	n/a	Organic compounds	Organic acids and derivatives	Carboxylic acids and derivatives
n-carbamyl-l-glutamate	C05829	n/a	Organic compounds	Organic acids and derivatives	Carboxylic acids and derivatives
n-cyclohexylformamide	C11519	CXF	Organic compounds	Organic acids and derivatives	Carboxylic acids and derivatives
n-ethylglycine	C11735	n/a	Organic compounds	Organic acids and derivatives	Carboxylic acids and derivatives
n-formimino-l-glutamate	C00439	n/a	Organic compounds	Organic acids and derivatives	Carboxylic acids and derivatives
n-formyl-l-aspartate	C01044	n/a	Organic compounds	Organic acids and derivatives	Carboxylic acids and derivatives
n-substitutedaminoacid	C03523	n/a	Organic compounds	Organic acids and derivatives	Carboxylic acids and derivatives
n-succinyl-l-2,6-diaminoheptanedioate	C04421	n/a	Organic compounds	Organic acids and derivatives	Carboxylic acids and derivatives
n-succinyl-l-2-amino-6-oxoheptanedioate	C04462	n/a	Organic compounds	Organic acids and derivatives	Carboxylic acids and derivatives
n-succinyl-l-glutamate	C05931	n/a	Organic compounds	Organic acids and derivatives	Carboxylic acids and derivatives
n-succinyl-l-glutamate5-semialdehyde	C05932	n/a	Organic compounds	Organic acids and derivatives	Carboxylic acids and derivatives
n-trimethyl-2-aminoethylphosphonate	C06459	n/a	Organic compounds	Organic acids and derivatives	Organic phosphonic acids and derivatives
o-acetyl-l-homoserine	C01077	n/a	Organic compounds	Organic acids and derivatives	Carboxylic acids and derivatives
o-acetyl-l-serine	C00979	OAS	Organic compounds	Organic acids and derivatives	Carboxylic acids and derivatives	Biologically significant ligand;
o-phospho-d-serine	C02532	n/a	Organic compounds	Organic acids and derivatives	Carboxylic acids and derivatives
o-phospho-l-homoserine	C01102	n/a	Organic compounds	Organic acids and derivatives	Carboxylic acids and derivatives
o-phospho-l-serine	C01005	SEP	Organic compounds	Organic acids and derivatives	Carboxylic acids and derivatives	Biologically significant ligand;
o-phosphorylhomoserine	C05702	n/a	Organic compounds	Organic acids and derivatives	Carboxylic acids and derivatives
ophthalmate	C21016	n/a	Organic compounds	Organic acids and derivatives	Carboxylic acids and derivatives
o-succinyl-l-homoserine	C01118	n/a	Organic compounds	Organic acids and derivatives	Carboxylic acids and derivatives
o-ureido-l-serine	C20639	n/a	Organic compounds	Organic acids and derivatives	Carboxylic acids and derivatives
oxalate	C00209	OXD	Organic compounds	Organic acids and derivatives	Carboxylic acids and derivatives	Biologically significant ligand;
oxaloacetate	C00036	OAA	Organic compounds	Organic acids and derivatives	Keto acids and derivatives	Biologically significant ligand;
oxaloglutarate	C05533	n/a	Organic compounds	Organic acids and derivatives	Carboxylic acids and derivatives
oxalosuccinate	C05379	OXS	Organic compounds	Organic acids and derivatives	Carboxylic acids and derivatives	Biologically significant ligand;
oxidizedrubredoxin	C00435	n/a	Organic compounds	Organic acids and derivatives	Carboxylic acids and derivatives
pantetheine	C00831	PNY	Organic compounds	Organic acids and derivatives	Carboxylic acids and derivatives
pantetheine4'-phosphate	C01134	PNS	Organic compounds	Organic acids and derivatives	Organic phosphoric acids and derivatives	Biologically significant ligand; UniProt cofactor
Pantothenate	C00864	PAU	Organic compounds	Organic acids and derivatives	Carboxylic acids and derivatives	Biologically significant ligand;
parathion	C06604	n/a	Organic compounds	Organic acids and derivatives	Organic thiophosphoric acids and derivatives
penicilling	C05551	n/a	Organic compounds	Organic acids and derivatives	Carboxylic acids and derivatives
phosphatidylglycerol	C00344	n/a	Organic compounds	Organic acids and derivatives	Carboxylic acids and derivatives
phosphatidylglycerophosphate	C03892	n/a	Organic compounds	Organic acids and derivatives	Carboxylic acids and derivatives
phosphoenolpyruvate	C00074	PEP	Organic compounds	Organic acids and derivatives	Organic phosphoric acids and derivatives	Biologically significant ligand;
phosphonoacetaldehyde	C03167	POA	Organic compounds	Organic acids and derivatives	Organic phosphonic acids and derivatives	Biologically significant ligand;
phosphonoacetate	C05682	PAE	Organic compounds	Organic acids and derivatives	Organic phosphonic acids and derivatives
prephenate	C00254	n/a	Organic compounds	Organic acids and derivatives	Keto acids and derivatives
propanoate	C00163	PPI	Organic compounds	Organic acids and derivatives	Carboxylic acids and derivatives
propanoylphosphate	C02876	n/a	Organic compounds	Organic acids and derivatives	Organic phosphoric acids and derivatives
propynoate	C00804	n/a	Organic compounds	Organic acids and derivatives	Carboxylic acids and derivatives
pyruvate	C00022	PYR	Organic compounds	Organic acids and derivatives	Keto acids and derivatives	Biologically significant ligand;
reducedcoenzymef420	C01080	n/a	Organic compounds	Organic acids and derivatives	Carboxylic acids and derivatives
r-s-glutathione	C02320	n/a	Organic compounds	Organic acids and derivatives	Carboxylic acids and derivatives
s-(1,2-dichlorovinyl)glutathione	C14868	n/a	Organic compounds	Organic acids and derivatives	Carboxylic acids and derivatives
s-(2,2-dichloro-1-hydroxy)ethylglutathione	C14861	n/a	Organic compounds	Organic acids and derivatives	Carboxylic acids and derivatives
s-(2-chloroacetyl)glutathione	C14864	n/a	Organic compounds	Organic acids and derivatives	Carboxylic acids and derivatives
s-(formylmethyl)glutathione	C14871	n/a	Organic compounds	Organic acids and derivatives	Carboxylic acids and derivatives
s-(hydroxymethyl)glutathione	C14180	AHE	Organic compounds	Organic acids and derivatives	Carboxylic acids and derivatives
sarcosine	C00213	SAR	Organic compounds	Organic acids and derivatives	Carboxylic acids and derivatives	Biologically significant ligand;
selenohomocysteine	C05698	n/a	Organic compounds	Organic acids and derivatives	Carboxylic acids and derivatives
se-methyl-l-selenocysteine	C05689	n/a	Organic compounds	Organic acids and derivatives	Carboxylic acids and derivatives
serine	C00716	DSN	Organic compounds	Organic acids and derivatives	Carboxylic acids and derivatives	Biologically significant ligand;
s-formylglutathione	C01031	n/a	Organic compounds	Organic acids and derivatives	Carboxylic acids and derivatives
s-glutathionyl-l-cysteine	C05526	n/a	Organic compounds	Organic acids and derivatives	Carboxylic acids and derivatives
shikimate3-phosphate	C03175	S3P	Organic compounds	Organic acids and derivatives	Organic phosphoric acids and derivatives	Biologically significant ligand;
s-substitutedn-acetyl-l-cysteine	C05727	n/a	Organic compounds	Organic acids and derivatives	Carboxylic acids and derivatives
stizolobate	C06047	n/a	Organic compounds	Organic acids and derivatives	Carboxylic acids and derivatives
succinate	C00042	SIN	Organic compounds	Organic acids and derivatives	Carboxylic acids and derivatives	Biologically significant ligand;
sulfuricmonoester	C16738	n/a	Organic compounds	Organic acids and derivatives	Carboxylic acids and derivatives
taurine	C00245	TAU	Organic compounds	Organic acids and derivatives	Organic sulfonic acids and derivatives
tetradecanoyl-[acp]	C05761	n/a	Organic compounds	Organic acids and derivatives	Carboxylic acids and derivatives
thiocysteine	C01962	n/a	Organic compounds	Organic acids and derivatives	Carboxylic acids and derivatives
thiomorpholine3-carboxylate	C03901	n/a	Organic compounds	Organic acids and derivatives	Carboxylic acids and derivatives
trans-3-chloroacrylicacid	C06614	n/a	Organic compounds	Organic acids and derivatives	Carboxylic acids and derivatives
trans-aconitate	C02341	n/a	Organic compounds	Organic acids and derivatives	Carboxylic acids and derivatives
trichloroacetate	C11150	n/a	Organic compounds	Organic acids and derivatives	Carboxylic acids and derivatives
trypanothionedisulfide	C03170	n/a	Organic compounds	Organic acids and derivatives	Carboxylic acids and derivatives
udp-n-acetylmuramoyl-l-alanyl-d-glutamyl-6-carboxy-l-lysyl-d-alanyl-d-alanine	C04882	n/a	Organic compounds	Organic acids and derivatives	Carboxylic acids and derivatives
udp-n-acetylmuramoyl-l-alanyl-gamma-d-glutamyl-l-lysyl-d-alanyl-d-alanine	C04702	n/a	Organic compounds	Organic acids and derivatives	Carboxylic acids and derivatives
urea	C00086	URE	Organic compounds	Organic acids and derivatives	Organic carbonic acids and derivatives	Biologically significant ligand;
urea-1-carboxylate	C01010	n/a	Organic compounds	Organic acids and derivatives	Organic carbonic acids and derivatives
vancomycin	C06689	n/a	Organic compounds	Organic acids and derivatives	Carboxylic acids and derivatives
vancomycinaglycone	C20719	n/a	Organic compounds	Organic acids and derivatives	Carboxylic acids and derivatives
[(2r)-3,3,4-trimethyl-6-oxo-3,6-dihydro-1h-pyran-2-yl]acetyl-coa	C20321	n/a	Organic compounds	Organic nitrogen compounds	Organonitrogen compounds
[5-(aminomethyl)furan-3-yl]methylphosphate	C21068	n/a	Organic compounds	Organic nitrogen compounds	Organonitrogen compounds
1,3-diaminopropane	C00986	13D	Organic compounds	Organic nitrogen compounds	Organonitrogen compounds	Biologically significant ligand;
1-haloalkane	C01872	n/a	Organic compounds	Organic nitrogen compounds	Organonitrogen compounds
2-iminopropanoate	C20904	NAK	Organic compounds	Organic nitrogen compounds	Organonitrogen compounds
3,4-dehydrothiomorpholine-3-carboxylate	C04445	n/a	Organic compounds	Organic nitrogen compounds	Organonitrogen compounds
3-guanidinopropanoate	C03065	n/a	Organic compounds	Organic nitrogen compounds	Organonitrogen compounds
4-guanidinobutanamide	C03078	n/a	Organic compounds	Organic nitrogen compounds	Organonitrogen compounds
acetylcholine	C01996	ACH	Organic compounds	Organic nitrogen compounds	Organonitrogen compounds	Biologically significant ligand;
agmatine	C00179	AG2	Organic compounds	Organic nitrogen compounds	Organonitrogen compounds
alcophosphamide	C16551	n/a	Organic compounds	Organic nitrogen compounds	Organonitrogen compounds
aldophosphamide	C07645	n/a	Organic compounds	Organic nitrogen compounds	Organonitrogen compounds
aminoacetaldehyde	C06735	n/a	Organic compounds	Organic nitrogen compounds	Organonitrogen compounds
aminopropylcadaverine	C16565	n/a	Organic compounds	Organic nitrogen compounds	Organonitrogen compounds
anandamide	C11695	n/a	Organic compounds	Organic nitrogen compounds	Organonitrogen compounds
betainealdehyde	C00576	BTL	Organic compounds	Organic nitrogen compounds	Organonitrogen compounds
cadaverine	C01672	N2P	Organic compounds	Organic nitrogen compounds	Organonitrogen compounds
carboxyphosphamide	C07646	n/a	Organic compounds	Organic nitrogen compounds	Organonitrogen compounds
choline	C00114	CHT	Organic compounds	Organic nitrogen compounds	Organonitrogen compounds	Biologically significant ligand;
cholinephosphate	C00588	PC	Organic compounds	Organic nitrogen compounds	Organonitrogen compounds	Biologically significant ligand;
cyclohexylisocyanide	C11520	n/a	Organic compounds	Organic nitrogen compounds	Organonitrogen compounds
dehydrospermidine	C15853	n/a	Organic compounds	Organic nitrogen compounds	Organonitrogen compounds
dimethylamine	C00543	n/a	Organic compounds	Organic nitrogen compounds	Organonitrogen compounds
ethanolamine	C00189	ETA	Organic compounds	Organic nitrogen compounds	Organonitrogen compounds
ethylamine	C00797	n/a	Organic compounds	Organic nitrogen compounds	Organonitrogen compounds
histamine	C00388	HSM	Organic compounds	Organic nitrogen compounds	Organonitrogen compounds	Biologically significant ligand;
hydrogencyanide	C01326	CYN	Organic compounds	Organic nitrogen compounds	Organonitrogen compounds
l-carnitine	C00318	n/a	Organic compounds	Organic nitrogen compounds	Organonitrogen compounds
l-histidinal	C01929	n/a	Organic compounds	Organic nitrogen compounds	Organonitrogen compounds
l-histidinol	C00860	HSO	Organic compounds	Organic nitrogen compounds	Organonitrogen compounds	Biologically significant ligand;
methylamine	C00218	n/a	Organic compounds	Organic nitrogen compounds	Organonitrogen compounds
n,n-dimethylaniline	C02846	n/a	Organic compounds	Organic nitrogen compounds	Organonitrogen compounds
n1-(3-aminopropyl)agmatine	C20560	AG3	Organic compounds	Organic nitrogen compounds	Organonitrogen compounds
n4-aminopropylspermidine	C21009	n/a	Organic compounds	Organic nitrogen compounds	Organonitrogen compounds
n4-bis(aminopropyl)spermidine	C21010	n/a	Organic compounds	Organic nitrogen compounds	Organonitrogen compounds
n-methylphenylethanolamine	C03711	n/a	Organic compounds	Organic nitrogen compounds	Organonitrogen compounds
ntau-methylhistamine	C05127	n/a	Organic compounds	Organic nitrogen compounds	Organonitrogen compounds
phenylethanolamine	C02735	n/a	Organic compounds	Organic nitrogen compounds	Organonitrogen compounds
porphobilinogen	C00931	n/a	Organic compounds	Organic nitrogen compounds	Organonitrogen compounds
putrescine	C00134	PUT	Organic compounds	Organic nitrogen compounds	Organonitrogen compounds	Biologically significant ligand;
spermidine	C00315	SPD	Organic compounds	Organic nitrogen compounds	Organonitrogen compounds	Biologically significant ligand;
spermine	C00750	SPM	Organic compounds	Organic nitrogen compounds	Organonitrogen compounds	Biologically significant ligand;
sphinganine	C00836	n/a	Organic compounds	Organic nitrogen compounds	Organonitrogen compounds
sphingosine	C00319	SQS	Organic compounds	Organic nitrogen compounds	Organonitrogen compounds	Biologically significant ligand;
sym-homospermidine	C06366	37Z	Organic compounds	Organic nitrogen compounds	Organonitrogen compounds	Biologically significant ligand;
trimethylamine	C00565	KEN	Organic compounds	Organic nitrogen compounds	Organonitrogen compounds
trimethylaminen-oxide	C01104	TMO	Organic compounds	Organic nitrogen compounds	Organonitrogen compounds
(2s,3s)-butane-2,3-diol	C03046	n/a	Organic compounds	Organic oxygen compounds	Organooxygen compounds
(4r,5s)-4,5,6-trihydroxy-2,3-dioxohexanoate	C04575	n/a	Organic compounds	Organic oxygen compounds	Organooxygen compounds
(r)-5-diphosphomevalonate	C01143	n/a	Organic compounds	Organic oxygen compounds	Organic oxoanionic compounds
(r)-lactaldehyde	C00937	n/a	Organic compounds	Organic oxygen compounds	Organooxygen compounds
(r)-lactate	C00256	LAC	Organic compounds	Organic oxygen compounds	Organooxygen compounds	Biologically significant ligand;
(r)-propane-1,2-diol	C02912	PGR	Organic compounds	Organic oxygen compounds	Organooxygen compounds
(r,r)-tartrate	C00898	TLA	Organic compounds	Organic oxygen compounds	Organooxygen compounds
(s)-acetoin	C01769	n/a	Organic compounds	Organic oxygen compounds	Organooxygen compounds
(s)-hydroxynitrile	C18797	n/a	Organic compounds	Organic oxygen compounds	Organooxygen compounds
(s)-lactaldehyde	C00424	n/a	Organic compounds	Organic oxygen compounds	Organooxygen compounds
(s)-lactate	C00186	2OP	Organic compounds	Organic oxygen compounds	Organooxygen compounds	Biologically significant ligand;
(s)-methylmalonatesemialdehyde	C06002	n/a	Organic compounds	Organic oxygen compounds	Organooxygen compounds
(s)-propane-1,2-diol	C02917	PGO	Organic compounds	Organic oxygen compounds	Organooxygen compounds	Biologically significant ligand;
[heparansulfate]-n-sulfoglucosamine	C17142	n/a	Organic compounds	Organic oxygen compounds	Organooxygen compounds
1-(1-alkenyl)-sn-glycero-3-phosphocholine	C04517	n/a	Organic compounds	Organic oxygen compounds	Organooxygen compounds
1-(2-aminophenyl)decane-1,3-dione	C21490	n/a	Organic compounds	Organic oxygen compounds	Organooxygen compounds
1-(6-hydroxypyridin-3-yl)-4-(methylamino)butan-1-one	C01297	HNM	Organic compounds	Organic oxygen compounds	Organooxygen compounds	Biologically significant ligand;
1-(beta-d-ribofuranosyl)-1,4-dihydronicotinamide	C15497	n/a	Organic compounds	Organic oxygen compounds	Organooxygen compounds
1,2-diacyl-sn-glycerol	C00641	n/a	Organic compounds	Organic oxygen compounds	Organooxygen compounds
1,2-dihydroxy-5-(methylthio)pent-1-en-3-one	C15606	n/a	Organic compounds	Organic oxygen compounds	Organooxygen compounds
1,5-anhydro-d-mannitol	C16538	n/a	Organic compounds	Organic oxygen compounds	Organooxygen compounds
1-acylglycerophosphocholine	C04230	n/a	Organic compounds	Organic oxygen compounds	Organooxygen compounds
1-acyl-sn-glycerol3-phosphate	C00681	n/a	Organic compounds	Organic oxygen compounds	Organooxygen compounds
1-alkyl-sn-glycero-3-phosphoethanolamine	C04476	n/a	Organic compounds	Organic oxygen compounds	Organooxygen compounds
1d-chiro-inositol	C19891	n/a	Organic compounds	Organic oxygen compounds	Organooxygen compounds
1-deoxy-d-xylulose5-phosphate	C11437	DXP	Organic compounds	Organic oxygen compounds	Organooxygen compounds	Biologically significant ligand;
1d-myo-inositol1,2,3,5,6-pentakisphosphate	C04579	n/a	Organic compounds	Organic oxygen compounds	Organooxygen compounds
1d-myo-inositol1,2,4,5,6-pentakisphosphate	C04563	n/a	Organic compounds	Organic oxygen compounds	Organooxygen compounds
1d-myo-inositol1,3,4,5,6-pentakisphosphate	C01284	5IP	Organic compounds	Organic oxygen compounds	Organooxygen compounds
1d-myo-inositol1,3,4-trisphosphate	C01243	n/a	Organic compounds	Organic oxygen compounds	Organooxygen compounds
1d-myo-inositol1,4-bisphosphate	C01220	n/a	Organic compounds	Organic oxygen compounds	Organooxygen compounds
1d-myo-inositol1,5-bis(diphosphate)2,3,4,6-tetrakisphosphate	C20690	2YN	Organic compounds	Organic oxygen compounds	Organooxygen compounds	Biologically significant ligand;
1d-myo-inositol1-diphosphate2,3,4,5,6-pentakisphosphate	C11174	n/a	Organic compounds	Organic oxygen compounds	Organooxygen compounds
1d-myo-inositol3,4,5,6-tetrakisphosphate	C04520	I0P	Organic compounds	Organic oxygen compounds	Organooxygen compounds
1d-myo-inositol5-diphosphate1,2,3,4,6-pentakisphosphate	C11526	n/a	Organic compounds	Organic oxygen compounds	Organooxygen compounds
1d-myo-inositolhexakisphosphate	C01204	I6P	Organic compounds	Organic oxygen compounds	Organooxygen compounds	Biologically significant ligand;
1-keto-d-chiro-inositol	C20251	ISE	Organic compounds	Organic oxygen compounds	Organooxygen compounds	Biologically significant ligand;
1l-myo-inositol1-phosphate	C04006	LIP	Organic compounds	Organic oxygen compounds	Organooxygen compounds	Biologically significant ligand;
1-o-(2-acetamido-2-deoxy-alpha-d-glucopyranosyl)-1d-myo-inositol3-phosphate	C19761	n/a	Organic compounds	Organic oxygen compounds	Organooxygen compounds
1-o-[2-(acetylamino)-2-deoxy-alpha-d-glucopyranosyl]-d-myo-inositol	C19784	n/a	Organic compounds	Organic oxygen compounds	Organooxygen compounds
1-octanal	C01545	n/a	Organic compounds	Organic oxygen compounds	Organooxygen compounds
1-pentanol	C16834	n/a	Organic compounds	Organic oxygen compounds	Organooxygen compounds
1-phosphatidyl-1d-myo-inositol3,4-bisphosphate	C11554	n/a	Organic compounds	Organic oxygen compounds	Organooxygen compounds
1-phosphatidyl-1d-myo-inositol3-phosphate	C04549	n/a	Organic compounds	Organic oxygen compounds	Organooxygen compounds
1-phosphatidyl-1d-myo-inositol5-phosphate	C11557	n/a	Organic compounds	Organic oxygen compounds	Organooxygen compounds
2-(formamido)-n1-(5'-phosphoribosyl)acetamidine	C04640	n/a	Organic compounds	Organic oxygen compounds	Organooxygen compounds
2,3,2'3'-tetrakis(3-hydroxytetradecanoyl)-d-glucosaminyl-1,6-beta-d-glucosamine1,4'-bisphosphate	C04919	n/a	Organic compounds	Organic oxygen compounds	Organooxygen compounds
2,3-bisphospho-d-glycerate	C01159	DG2	Organic compounds	Organic oxygen compounds	Organooxygen compounds	Biologically significant ligand;
2,4,6/3,5-pentahydroxycyclohexanone	C00691	n/a	Organic compounds	Organic oxygen compounds	Organooxygen compounds
2,4-bis(acetamido)-2,4,6-trideoxy-beta-l-altropyranose	C19972	n/a	Organic compounds	Organic oxygen compounds	Organooxygen compounds
2,5-diamino-6-(5-phospho-d-ribitylamino)pyrimidin-4(3h)-one	C18910	n/a	Organic compounds	Organic oxygen compounds	Organooxygen compounds
2,5-diamino-6-(5-phospho-d-ribosylamino)pyrimidin-4(3h)-one	C01304	n/a	Organic compounds	Organic oxygen compounds	Organooxygen compounds
2,6-dihydroxypseudooxynicotine	C15986	n/a	Organic compounds	Organic oxygen compounds	Organooxygen compounds
2-aminobenzoylacetate	C21453	n/a	Organic compounds	Organic oxygen compounds	Organooxygen compounds
2-dehydro-d-glucose	C02779	KBG	Organic compounds	Organic oxygen compounds	Organooxygen compounds	Biologically significant ligand;
2-dehydropyranose	C15593	n/a	Organic compounds	Organic oxygen compounds	Organooxygen compounds
2'-deoxy-5-hydroxymethylcytidine-5'-diphosphate	C11038	n/a	Organic compounds	Organic oxygen compounds	Organic oxoanionic compounds
2-deoxy-5-keto-d-gluconicacid6-phosphate	C06893	n/a	Organic compounds	Organic oxygen compounds	Organooxygen compounds
2-deoxy-d-ribose1-phosphate	C00672	n/a	Organic compounds	Organic oxygen compounds	Organooxygen compounds
2-deoxy-l-scyllo-inosose	C17209	n/a	Organic compounds	Organic oxygen compounds	Organooxygen compounds
2-deoxy-scyllo-inosamine	C17580	n/a	Organic compounds	Organic oxygen compounds	Organooxygen compounds
2-epi-5-epi-valiolone	C17691	n/a	Organic compounds	Organic oxygen compounds	Organooxygen compounds
2-hydroxy-3-oxopropanoate	C01146	n/a	Organic compounds	Organic oxygen compounds	Organooxygen compounds
2-hydroxycyclohexan-1-one	C01147	n/a	Organic compounds	Organic oxygen compounds	Organooxygen compounds
2-keto-3-deoxy-d-glycero-d-galacto-nononate9-phosphate	C21383	n/a	Organic compounds	Organic oxygen compounds	Organooxygen compounds
2-methyl-3-oxopropanoate	C00349	n/a	Organic compounds	Organic oxygen compounds	Organooxygen compounds
2-methylbutanal	C02223	n/a	Organic compounds	Organic oxygen compounds	Organooxygen compounds
2-o-(alpha-d-glucopyranosyl)-3-phospho-d-glycerate	C19791	n/a	Organic compounds	Organic oxygen compounds	n/a
2-o-(alpha-d-glucopyranosyl)-d-glycerate	C19792	n/a	Organic compounds	Organic oxygen compounds	n/a
2-o-sulfo-alpha,alpha-trehalose	C20985	n/a	Organic compounds	Organic oxygen compounds	Organooxygen compounds
2-phospho-d-glycerate	C00631	2PG	Organic compounds	Organic oxygen compounds	Organooxygen compounds	Biologically significant ligand;
2-succinylbenzoate	C02730	n/a	Organic compounds	Organic oxygen compounds	Organooxygen compounds
3-acetamidopropanal	C18170	n/a	Organic compounds	Organic oxygen compounds	Organooxygen compounds
3-aminopropanal	C05665	n/a	Organic compounds	Organic oxygen compounds	Organooxygen compounds
3-dehydro-2-deoxy-d-gluconate	C03926	n/a	Organic compounds	Organic oxygen compounds	Organooxygen compounds
3-dehydro-4-phospho-d-erythronate	C21610	n/a	Organic compounds	Organic oxygen compounds	Organooxygen compounds
3-dehydro-4-phospho-l-erythronate	C21611	n/a	Organic compounds	Organic oxygen compounds	Organooxygen compounds
3-dehydro-d-glucose6-phosphate	C20668	n/a	Organic compounds	Organic oxygen compounds	Organooxygen compounds
3-dehydro-d-sphinganine	C02934	n/a	Organic compounds	Organic oxygen compounds	Organooxygen compounds
3-dehydro-l-gulonate	C00618	n/a	Organic compounds	Organic oxygen compounds	Organooxygen compounds
3-dehydroshikimate	C02637	3DS	Organic compounds	Organic oxygen compounds	Organooxygen compounds	Biologically significant ligand;
3-deoxy-d-arabino-hept-2-ulosonate7-phosphate	C04691	n/a	Organic compounds	Organic oxygen compounds	Organooxygen compounds
3-deoxy-d-glycero-d-galacto-non-2-ulosonicacid	C20934	KDN	Organic compounds	Organic oxygen compounds	Organooxygen compounds	Biologically significant ligand;
3-deoxy-d-manno-octulosonate	C01187	n/a	Organic compounds	Organic oxygen compounds	Organooxygen compounds
3-deoxy-d-manno-octulosonate8-phosphate	C04478	n/a	Organic compounds	Organic oxygen compounds	Organooxygen compounds
3-hexenal	C16310	n/a	Organic compounds	Organic oxygen compounds	Organooxygen compounds
3-hydroxykynurenamine	C05636	n/a	Organic compounds	Organic oxygen compounds	Organooxygen compounds
3-hydroxy-l-kynurenine	C03227	n/a	Organic compounds	Organic oxygen compounds	Organooxygen compounds
3-hydroxypropanal	C00969	n/a	Organic compounds	Organic oxygen compounds	Organooxygen compounds
3-mercaptolactate	C05823	n/a	Organic compounds	Organic oxygen compounds	Organooxygen compounds
3-o-phospho-alpha-d-man-(1->2)-alpha-d-man-(1->2)-[alpha-d-man-(1->3)-alpha-d-man-(1->3)-alpha-d-man-(1->2)-alpha-d-man-(1->2)]n-alpha-d-man-(1->3)-alpha-d-man-(1->3)-alpha-d-man-(1->3)-alpha-d-glcnac-diphospho-ditrans,octacis-undecaprenol	C20762	n/a	Organic compounds	Organic oxygen compounds	Organooxygen compounds
3-oxopropanoate	C00222	n/a	Organic compounds	Organic oxygen compounds	Organooxygen compounds
3-phospho-d-glycerate	C00197	3PG	Organic compounds	Organic oxygen compounds	Organooxygen compounds	Biologically significant ligand;
3-phosphonooxypyruvate	C03232	HPV	Organic compounds	Organic oxygen compounds	Organooxygen compounds	Biologically significant ligand;
4-(2-amino-3-hydroxyphenyl)-2,4-dioxobutanoate	C05645	n/a	Organic compounds	Organic oxygen compounds	Organooxygen compounds
4-(2-aminophenyl)-2,4-dioxobutanoate	C01252	3EE	Organic compounds	Organic oxygen compounds	Organooxygen compounds	Biologically significant ligand;
4-(n-nitrosomethylamino)-1-(3-pyridyl)-1-butanone	C16453	n/a	Organic compounds	Organic oxygen compounds	Organooxygen compounds
4-[(hydroxymethyl)nitrosoamino]-1-(3-pyridinyl)-1-butanone	C19563	n/a	Organic compounds	Organic oxygen compounds	Organooxygen compounds
4-amino-2-methyl-5-(diphosphooxymethyl)pyrimidine	C04752	n/a	Organic compounds	Organic oxygen compounds	Organic oxoanionic compounds
4-aminobutyraldehyde	C00555	n/a	Organic compounds	Organic oxygen compounds	Organooxygen compounds
4-hydroxy-4-(methylnitrosoamino)-1-(3-pyridinyl)-1-butanone	C19566	n/a	Organic compounds	Organic oxygen compounds	Organooxygen compounds
4-hydroxybenzaldehyde	C00633	HBA	Organic compounds	Organic oxygen compounds	Organooxygen compounds
4-phospho-d-erythronate	C03393	DER	Organic compounds	Organic oxygen compounds	Organooxygen compounds
4-phospho-d-threonate	C21585	n/a	Organic compounds	Organic oxygen compounds	Organooxygen compounds
4-trimethylammoniobutanal	C01149	n/a	Organic compounds	Organic oxygen compounds	Organooxygen compounds
5,10-methenyltetrahydromethanopterin	C04330	n/a	Organic compounds	Organic oxygen compounds	Organooxygen compounds
5,10-methylenetetrahydromethanopterin	C04377	H4M	Organic compounds	Organic oxygen compounds	Organooxygen compounds	Biologically significant ligand;
5-amino-1-(5-phospho-d-ribosyl)imidazole-4-carboxylate	C04751	C2R	Organic compounds	Organic oxygen compounds	Organooxygen compounds	Biologically significant ligand;
5-amino-6-(1-d-ribitylamino)uracil	C04732	n/a	Organic compounds	Organic oxygen compounds	Organooxygen compounds
5-amino-6-(5'-phospho-d-ribitylamino)uracil	C04454	n/a	Organic compounds	Organic oxygen compounds	Organooxygen compounds
5-amino-6-(5'-phosphoribosylamino)uracil	C01268	n/a	Organic compounds	Organic oxygen compounds	Organooxygen compounds
5-carboxyamino-1-(5-phospho-d-ribosyl)imidazole	C15667	n/a	Organic compounds	Organic oxygen compounds	Organooxygen compounds
5-deoxyribose-1-phosphate	C16637	n/a	Organic compounds	Organic oxygen compounds	Organooxygen compounds
5-hydroxykynurenamine	C05638	n/a	Organic compounds	Organic oxygen compounds	Organooxygen compounds
5-hydroxykynurenine	C05651	n/a	Organic compounds	Organic oxygen compounds	Organooxygen compounds
5-hydroxymethyl-2-furaldehyde	C11101	n/a	Organic compounds	Organic oxygen compounds	Organooxygen compounds
5-hydroxy-n-formylkynurenine	C05648	n/a	Organic compounds	Organic oxygen compounds	Organooxygen compounds
5-methyl-5,6,7,8-tetrahydromethanopterin	C04488	n/a	Organic compounds	Organic oxygen compounds	Organooxygen compounds
5-phospho-alpha-d-ribose1-diphosphate	C00119	PRP	Organic compounds	Organic oxygen compounds	Organooxygen compounds	Biologically significant ligand;
5-phospho-d-ribosylamine	C03090	GRF	Organic compounds	Organic oxygen compounds	Organooxygen compounds
6-deoxy-l-galactose	C01019	n/a	Organic compounds	Organic oxygen compounds	Organooxygen compounds
6-phospho-d-gluconate	C00345	6PG	Organic compounds	Organic oxygen compounds	Organooxygen compounds	Biologically significant ligand;
8-amino-3,8-dideoxy-d-manno-octulosonate	C21333	n/a	Organic compounds	Organic oxygen compounds	Organooxygen compounds
8-dehydro-3-deoxy-d-manno-octulosonate	C21332	n/a	Organic compounds	Organic oxygen compounds	Organooxygen compounds
acetaldehyde	C00084	ACE	Organic compounds	Organic oxygen compounds	Organooxygen compounds
acetone	C00207	ACN	Organic compounds	Organic oxygen compounds	Organooxygen compounds
acetophenone	C07113	AC0	Organic compounds	Organic oxygen compounds	Organooxygen compounds
alpha,alpha-trehalose	C01083	TRE	Organic compounds	Organic oxygen compounds	Organooxygen compounds	Biologically significant ligand;
alpha,beta-dihydroxyethyl-tpp	C13378	n/a	Organic compounds	Organic oxygen compounds	Organic oxoanionic compounds
alpha-d-galactose1-phosphate	C00446	n/a	Organic compounds	Organic oxygen compounds	Organooxygen compounds
alpha-d-glucosamine1-phosphate	C06156	n/a	Organic compounds	Organic oxygen compounds	Organooxygen compounds
alpha-d-glucose	C00267	BMA	Organic compounds	Organic oxygen compounds	Organooxygen compounds	Biologically significant ligand;
alpha-d-glucose1-phosphate	C00103	G1P	Organic compounds	Organic oxygen compounds	Organooxygen compounds	Biologically significant ligand;
alpha-d-glucose6-phosphate	C00668	G6P	Organic compounds	Organic oxygen compounds	Organooxygen compounds	Biologically significant ligand;
alpha-d-hexose1-phosphate	C01171	n/a	Organic compounds	Organic oxygen compounds	Organooxygen compounds
alpha-d-hexose6-phosphate	C03735	n/a	Organic compounds	Organic oxygen compounds	Organooxygen compounds
alpha-d-man-(1-	C20761	n/a	Organic compounds	Organic oxygen compounds	Organooxygen compounds
alpha-d-ribose1,2-cyclicphosphate5-phosphate	C20440	n/a	Organic compounds	Organic oxygen compounds	Organooxygen compounds
alpha-d-ribose1-methylphosphonate5-phosphate	C20423	n/a	Organic compounds	Organic oxygen compounds	Organooxygen compounds
alpha-d-ribose1-methylphosphonate5-triphosphate	C20422	n/a	Organic compounds	Organic oxygen compounds	Organooxygen compounds
alpha-d-ribose1-phosphate	C00620	R1P	Organic compounds	Organic oxygen compounds	Organooxygen compounds	Biologically significant ligand;
alpha-d-sedoheptulopyranose7-phosphate	C20956	n/a	Organic compounds	Organic oxygen compounds	Organooxygen compounds
aminoacetone	C01888	n/a	Organic compounds	Organic oxygen compounds	Organooxygen compounds
aminofructose6-phosphate	C12214	n/a	Organic compounds	Organic oxygen compounds	Organooxygen compounds
aminoimidazoleribotide	C03373	AIR	Organic compounds	Organic oxygen compounds	Organooxygen compounds	Biologically significant ligand;
beta-2,3,4,5,6-pentachlorocyclohexanol	C16181	n/a	Organic compounds	Organic oxygen compounds	Organooxygen compounds
beta-2,3,5,6-tetrachloro-1,4-cyclohexanediol	C16182	n/a	Organic compounds	Organic oxygen compounds	Organooxygen compounds
beta-d-fructose	C02336	n/a	Organic compounds	Organic oxygen compounds	Organooxygen compounds
beta-d-fructose1,6-bisphosphate	C05378	FBP	Organic compounds	Organic oxygen compounds	Organooxygen compounds	Biologically significant ligand;
beta-d-fructose2,6-bisphosphate	C00665	FDP	Organic compounds	Organic oxygen compounds	Organooxygen compounds	Biologically significant ligand;
beta-d-fructose6-phosphate	C05345	n/a	Organic compounds	Organic oxygen compounds	Organooxygen compounds
beta-d-glucose	C00221	BGC	Organic compounds	Organic oxygen compounds	Organooxygen compounds	Biologically significant ligand;
beta-d-glucose1-phosphate	C00663	n/a	Organic compounds	Organic oxygen compounds	Organooxygen compounds
beta-d-glucose6-phosphate	C01172	BG6	Organic compounds	Organic oxygen compounds	Organooxygen compounds	Biologically significant ligand;
bis(1l-myo-inositol)-3,1'-phosphate1-phosphate	C19799	n/a	Organic compounds	Organic oxygen compounds	Organooxygen compounds
bromobenzene-3,4-dihydrodiol	C14844	n/a	Organic compounds	Organic oxygen compounds	Organooxygen compounds
butanal	C01412	n/a	Organic compounds	Organic oxygen compounds	Organooxygen compounds
cis-3-chloroallylaldehyde	C16348	n/a	Organic compounds	Organic oxygen compounds	Organooxygen compounds
Cutin	C07299	n/a	Organic compounds	Organic oxygen compounds	n/a
cyclicadp-ribose	C13050	CXR	Organic compounds	Organic oxygen compounds	Organooxygen compounds	Biologically significant ligand;
cyclohexane-1,2-dione	C06105	CXO	Organic compounds	Organic oxygen compounds	Organooxygen compounds
cyclohexanone	C00414	CYH	Organic compounds	Organic oxygen compounds	Organooxygen compounds	Biologically significant ligand;
d-aldonolactone	C16830	n/a	Organic compounds	Organic oxygen compounds	Organooxygen compounds
d-aldose	C00737	n/a	Organic compounds	Organic oxygen compounds	Organooxygen compounds
d-allose6-phosphate	C02962	n/a	Organic compounds	Organic oxygen compounds	Organooxygen compounds
d-allulose6-phosphate	C18096	TA6	Organic compounds	Organic oxygen compounds	Organooxygen compounds
d-arabino-hex-3-ulose6-phosphate	C06019	n/a	Organic compounds	Organic oxygen compounds	Organooxygen compounds
d-arabinose5-phosphate	C01112	R52	Organic compounds	Organic oxygen compounds	Organooxygen compounds
dehypoxanthinefutalosine	C17010	n/a	Organic compounds	Organic oxygen compounds	Organooxygen compounds
deoxyribose	C01801	n/a	Organic compounds	Organic oxygen compounds	Organooxygen compounds
d-erythrose4-phosphate	C00279	E4P	Organic compounds	Organic oxygen compounds	Organooxygen compounds	Biologically significant ligand;
d-fructose	C00095	FRU	Organic compounds	Organic oxygen compounds	Organooxygen compounds	Biologically significant ligand;
d-fructose1,6-bisphosphate	C00354	n/a	Organic compounds	Organic oxygen compounds	Organooxygen compounds
d-fructose1-phosphate	C01094	F1X	Organic compounds	Organic oxygen compounds	Organooxygen compounds
d-fructose6-phosphate	C00085	F6P	Organic compounds	Organic oxygen compounds	Organooxygen compounds	Biologically significant ligand;
d-galactaro-1,5-lactone	C20889	n/a	Organic compounds	Organic oxygen compounds	Organooxygen compounds
d-galactono-1,5-lactone	C02669	n/a	Organic compounds	Organic oxygen compounds	Organooxygen compounds
d-galactose	C00124	n/a	Organic compounds	Organic oxygen compounds	Organooxygen compounds
d-galacturonate	C00333	n/a	Organic compounds	Organic oxygen compounds	Organooxygen compounds
d-glucarate	C00818	n/a	Organic compounds	Organic oxygen compounds	Organooxygen compounds
d-glucaro-1,5-lactone	C20890	15L	Organic compounds	Organic oxygen compounds	Organooxygen compounds	Biologically significant ligand;
d-glucitol	C00794	SOR	Organic compounds	Organic oxygen compounds	Organooxygen compounds
d-gluconate	C00257	n/a	Organic compounds	Organic oxygen compounds	Organooxygen compounds
d-glucono-1,5-lactone	C00198	LGC	Organic compounds	Organic oxygen compounds	Organooxygen compounds	Biologically significant ligand;
d-glucono-1,5-lactone6-phosphate	C01236	n/a	Organic compounds	Organic oxygen compounds	Organooxygen compounds
d-glucosamine	C00329	n/a	Organic compounds	Organic oxygen compounds	Organooxygen compounds
d-glucosamine6-phosphate	C00352	GLP	Organic compounds	Organic oxygen compounds	Organooxygen compounds	Biologically significant ligand;
d-glucose	C00031	n/a	Organic compounds	Organic oxygen compounds	Organooxygen compounds
d-glucose6-phosphate	C00092	G6Q	Organic compounds	Organic oxygen compounds	Organooxygen compounds	Biologically significant ligand;
d-glucuronate	C00191	n/a	Organic compounds	Organic oxygen compounds	Organooxygen compounds
d-glucuronate1-phosphate	C05385	n/a	Organic compounds	Organic oxygen compounds	Organooxygen compounds
d-glyceraldehyde	C00577	n/a	Organic compounds	Organic oxygen compounds	Organooxygen compounds
d-glyceraldehyde3-phosphate	C00118	G3H	Organic compounds	Organic oxygen compounds	Organooxygen compounds	Biologically significant ligand;
d-glycerate	C00258	DGY	Organic compounds	Organic oxygen compounds	Organooxygen compounds	Biologically significant ligand;
d-glycero-beta-d-manno-heptose1,7-bisphosphate	C11472	n/a	Organic compounds	Organic oxygen compounds	Organooxygen compounds
d-glycero-beta-d-manno-heptose1-phosphate	C07838	n/a	Organic compounds	Organic oxygen compounds	Organooxygen compounds
diacetyl	C00741	n/a	Organic compounds	Organic oxygen compounds	Organooxygen compounds
d-mannitol1-phosphate	C00644	n/a	Organic compounds	Organic oxygen compounds	Organooxygen compounds
d-mannose	C00159	n/a	Organic compounds	Organic oxygen compounds	Organooxygen compounds
d-mannose1-phosphate	C00636	M1P	Organic compounds	Organic oxygen compounds	Organooxygen compounds	Biologically significant ligand;
d-mannose6-phosphate	C00275	n/a	Organic compounds	Organic oxygen compounds	Organooxygen compounds
d-myo-inositol1,3-bisphosphate	C04062	n/a	Organic compounds	Organic oxygen compounds	Organooxygen compounds
d-myo-inositol3,4-bisphosphate	C04063	n/a	Organic compounds	Organic oxygen compounds	Organooxygen compounds
d-ribitol5-phosphate	C01068	n/a	Organic compounds	Organic oxygen compounds	Organooxygen compounds
d-ribose	C00121	RIB	Organic compounds	Organic oxygen compounds	Organooxygen compounds	Biologically significant ligand;
d-ribose1,5-bisphosphate	C01151	RI2	Organic compounds	Organic oxygen compounds	Organooxygen compounds	Biologically significant ligand;
d-ribose5-phosphate	C00117	R5P	Organic compounds	Organic oxygen compounds	Organooxygen compounds	Biologically significant ligand;
d-ribulose1,5-bisphosphate	C01182	XBP	Organic compounds	Organic oxygen compounds	Organooxygen compounds	Biologically significant ligand;
d-ribulose5-phosphate	C00199	5RP	Organic compounds	Organic oxygen compounds	Organooxygen compounds	Biologically significant ligand;
d-sedoheptulose7-phosphate	C05382	I22	Organic compounds	Organic oxygen compounds	Organooxygen compounds	Biologically significant ligand;
d-tagatose	C00795	n/a	Organic compounds	Organic oxygen compounds	Organooxygen compounds
d-tagatose1,6-bisphosphate	C03785	n/a	Organic compounds	Organic oxygen compounds	Organooxygen compounds
d-tagatose6-phosphate	C01097	n/a	Organic compounds	Organic oxygen compounds	Organooxygen compounds
d-threonate	C21649	n/a	Organic compounds	Organic oxygen compounds	Organooxygen compounds
d-xylose	C00181	XYP	Organic compounds	Organic oxygen compounds	Organooxygen compounds	Biologically significant ligand;
d-xylulose	C00310	n/a	Organic compounds	Organic oxygen compounds	Organooxygen compounds
d-xylulose5-phosphate	C00231	n/a	Organic compounds	Organic oxygen compounds	Organooxygen compounds
erythromycind	C06633	n/a	Organic compounds	Organic oxygen compounds	Organooxygen compounds
ethanol	C00469	EOH	Organic compounds	Organic oxygen compounds	Organooxygen compounds	Biologically significant ligand;
ethyleneglycol	C01380	n/a	Organic compounds	Organic oxygen compounds	Organooxygen compounds
formaldehyde	C00067	FOR	Organic compounds	Organic oxygen compounds	Organooxygen compounds
furan-2,5-dicarbaldehyde	C20899	n/a	Organic compounds	Organic oxygen compounds	Organooxygen compounds
galactitol	C01697	n/a	Organic compounds	Organic oxygen compounds	Organooxygen compounds
galactitol1-phosphate	C06311	S6P	Organic compounds	Organic oxygen compounds	Organooxygen compounds
glycerol	C00116	GOL	Organic compounds	Organic oxygen compounds	Organooxygen compounds	Biologically significant ligand;
glycerone	C00184	2HA	Organic compounds	Organic oxygen compounds	Organooxygen compounds	Biologically significant ligand;
glyceronephosphate	C00111	13P	Organic compounds	Organic oxygen compounds	Organooxygen compounds	Biologically significant ligand;
glycol	C15588	EDO	Organic compounds	Organic oxygen compounds	Organooxygen compounds
glycolaldehyde	C00266	n/a	Organic compounds	Organic oxygen compounds	Organooxygen compounds
hydroxyacetone	C05235	n/a	Organic compounds	Organic oxygen compounds	Organooxygen compounds
inositol1-phosphate	C01177	IPD	Organic compounds	Organic oxygen compounds	Organooxygen compounds	Biologically significant ligand;
kanosamine	C12212	n/a	Organic compounds	Organic oxygen compounds	Organooxygen compounds
kanosamine6-phosphate	C12213	n/a	Organic compounds	Organic oxygen compounds	Organooxygen compounds
l-aminoacid	C00151	n/a	Organic compounds	Organic oxygen compounds	Organooxygen compounds
l-arabinitol	C00532	SST	Organic compounds	Organic oxygen compounds	Organooxygen compounds
l-arabinose	C00259	n/a	Organic compounds	Organic oxygen compounds	Organooxygen compounds
l-iditol	C01507	n/a	Organic compounds	Organic oxygen compounds	Organooxygen compounds
lipidadisaccharide	C04932	n/a	Organic compounds	Organic oxygen compounds	Organooxygen compounds
l-kynurenine	C00328	KYN	Organic compounds	Organic oxygen compounds	Organooxygen compounds	Biologically significant ligand;
l-ribulose	C00508	XLF	Organic compounds	Organic oxygen compounds	Organooxygen compounds
l-sorbose	C00247	BDF	Organic compounds	Organic oxygen compounds	Organooxygen compounds	Biologically significant ligand;
l-xylulose	C00312	n/a	Organic compounds	Organic oxygen compounds	Organooxygen compounds
maltose	C00208	MAL	Organic compounds	Organic oxygen compounds	Organooxygen compounds	Biologically significant ligand;
mannitol	C00392	MTL	Organic compounds	Organic oxygen compounds	Organooxygen compounds	Biologically significant ligand;
meso-tartaricacid	C00552	SRT	Organic compounds	Organic oxygen compounds	Organooxygen compounds
methanol	C00132	MOH	Organic compounds	Organic oxygen compounds	Organooxygen compounds
methylglyoxal	C00546	n/a	Organic compounds	Organic oxygen compounds	Organooxygen compounds
mycinamiciniii	C15681	ZM3	Organic compounds	Organic oxygen compounds	Organooxygen compounds	Biologically significant ligand;
mycinamiciniv	C18846	MIV	Organic compounds	Organic oxygen compounds	Organooxygen compounds	Biologically significant ligand;
mycinamicinvi	C15682	MVI	Organic compounds	Organic oxygen compounds	Organooxygen compounds	Biologically significant ligand;
mycothiol	C06717	n/a	Organic compounds	Organic oxygen compounds	Organooxygen compounds
myo-inositol	C00137	INS	Organic compounds	Organic oxygen compounds	Organooxygen compounds	Biologically significant ligand;
myo-inositol4-phosphate	C03546	n/a	Organic compounds	Organic oxygen compounds	Organooxygen compounds
n-(5-phospho-d-ribosyl)anthranilate	C04302	n/a	Organic compounds	Organic oxygen compounds	Organooxygen compounds
n,n'-diacetylchitobiose	C01674	CBS	Organic compounds	Organic oxygen compounds	Organooxygen compounds
n4-acetylaminobutanal	C05936	n/a	Organic compounds	Organic oxygen compounds	Organooxygen compounds
n-acetyl-4-o-acetylneuraminate	C04015	n/a	Organic compounds	Organic oxygen compounds	Organooxygen compounds
n-acetyl-9-o-acetylneuraminate	C04017	5N6	Organic compounds	Organic oxygen compounds	Organooxygen compounds
n-acetyl-alpha-d-galactosamine1-phosphate	C18060	n/a	Organic compounds	Organic oxygen compounds	Organooxygen compounds
n-acetyl-alpha-d-glucosamine1-phosphate	C04501	NG1	Organic compounds	Organic oxygen compounds	Organooxygen compounds	Biologically significant ligand;
n-acetyl-beta-d-glucosaminyl-(1-	C21747	n/a	Organic compounds	Organic oxygen compounds	Organooxygen compounds
n-acetyl-d-glucosamine	C00140	NAG	Organic compounds	Organic oxygen compounds	Organooxygen compounds
n-acetyl-d-glucosamine6-phosphate	C00357	BMX	Organic compounds	Organic oxygen compounds	Organooxygen compounds	Biologically significant ligand;
n-acetyl-d-mannosamine	C00645	n/a	Organic compounds	Organic oxygen compounds	Organooxygen compounds
n-acetyl-d-mannosamine6-phosphate	C04257	n/a	Organic compounds	Organic oxygen compounds	Organooxygen compounds
n-acetylmuramate	C02713	MUB	Organic compounds	Organic oxygen compounds	Organooxygen compounds
n-acetylmuramate6-phosphate	C16698	n/a	Organic compounds	Organic oxygen compounds	Organooxygen compounds
n-acetylmuramicacidalpha-1-phosphate	C21027	491	Organic compounds	Organic oxygen compounds	Organooxygen compounds	Biologically significant ligand;
n-acetylmuramoyl-ala	C02999	n/a	Organic compounds	Organic oxygen compounds	Organooxygen compounds
n-acetylneuraminate	C00270	SIA	Organic compounds	Organic oxygen compounds	Organooxygen compounds
n-acetylneuraminate9-phosphate	C06241	n/a	Organic compounds	Organic oxygen compounds	Organooxygen compounds
n-acetyl-o-acetylneuraminate	C03708	n/a	Organic compounds	Organic oxygen compounds	Organooxygen compounds
n-acylneuraminate	C00591	n/a	Organic compounds	Organic oxygen compounds	Organooxygen compounds
n-formyl-l-kynurenine	C02700	n/a	Organic compounds	Organic oxygen compounds	Organooxygen compounds
n-glycoloyl-neuraminate	C03410	NGE	Organic compounds	Organic oxygen compounds	Organooxygen compounds
nicotinamide-beta-riboside	C03150	NNR	Organic compounds	Organic oxygen compounds	Organooxygen compounds	Biologically significant ligand;
nicotinated-ribonucleoside	C05841	n/a	Organic compounds	Organic oxygen compounds	Organooxygen compounds
nitrile	C00726	n/a	Organic compounds	Organic oxygen compounds	Organooxygen compounds
nnal-n-glucuronide	C19606	n/a	Organic compounds	Organic oxygen compounds	Organooxygen compounds
nonane-4,6-dione	C02445	n/a	Organic compounds	Organic oxygen compounds	Organooxygen compounds
penicillin	C00395	n/a	Organic compounds	Organic oxygen compounds	Organooxygen compounds
pentan-2-one	C01949	n/a	Organic compounds	Organic oxygen compounds	Organooxygen compounds
phosphatidylcholine	C00157	n/a	Organic compounds	Organic oxygen compounds	Organooxygen compounds
plasmenylcholine	C00958	n/a	Organic compounds	Organic oxygen compounds	Organooxygen compounds
polysaccharide	C00420	CTR	Organic compounds	Organic oxygen compounds	n/a
propan-2-ol	C01845	IPA	Organic compounds	Organic oxygen compounds	Organooxygen compounds
propanal	C00479	n/a	Organic compounds	Organic oxygen compounds	Organooxygen compounds
propane-1,2-diol	C00583	n/a	Organic compounds	Organic oxygen compounds	Organooxygen compounds
propane-1,3-diol	C02457	PDO	Organic compounds	Organic oxygen compounds	Organooxygen compounds
propane-1-ol	C05979	POL	Organic compounds	Organic oxygen compounds	Organooxygen compounds
pseudouridine5'-phosphate	C01168	PSU	Organic compounds	Organic oxygen compounds	Organooxygen compounds	Biologically significant ligand;
quinate	C00296	QIC	Organic compounds	Organic oxygen compounds	Organooxygen compounds	Biologically significant ligand;
s-(5-deoxy-d-ribos-5-yl)-l-homocysteine	C03539	2WP	Organic compounds	Organic oxygen compounds	Organooxygen compounds
salbostatin6'-phosphate	C21211	n/a	Organic compounds	Organic oxygen compounds	n/a
scyllo-inositol	C06153	n/a	Organic compounds	Organic oxygen compounds	Organooxygen compounds
sedoheptulose	C02076	n/a	Organic compounds	Organic oxygen compounds	Organooxygen compounds
sedoheptulose1,7-bisphosphate	C00447	n/a	Organic compounds	Organic oxygen compounds	Organooxygen compounds
sedoheptulose1-phosphate	C06222	n/a	Organic compounds	Organic oxygen compounds	Organooxygen compounds
shikimate	C00493	SKM	Organic compounds	Organic oxygen compounds	Organooxygen compounds	Biologically significant ligand;
s-methyl-5-thio-alpha-d-ribose1-phosphate	C04188	n/a	Organic compounds	Organic oxygen compounds	Organooxygen compounds
s-methyl-5-thio-d-ribose	C03089	SR1	Organic compounds	Organic oxygen compounds	Organooxygen compounds	Biologically significant ligand;
s-methyl-5-thio-d-ribulose1-phosphate	C04582	MRU	Organic compounds	Organic oxygen compounds	Organooxygen compounds	Biologically significant ligand;
succinicaldehyde	C16835	n/a	Organic compounds	Organic oxygen compounds	Organooxygen compounds
Tetrahydromethanopterin	C01217	n/a	Organic compounds	Organic oxygen compounds	Organooxygen compounds
trans,trans-2,3,4,5-tetradehydroacyl-coa	C04512	n/a	Organic compounds	Organic oxygen compounds	Organooxygen compounds
trans-1,2-dihydrobenzene-1,2-diol	C04221	n/a	Organic compounds	Organic oxygen compounds	Organooxygen compounds
trans-3-chloroallylaldehyde	C06613	n/a	Organic compounds	Organic oxygen compounds	Organooxygen compounds
trichloroethanolglucuronide	C14869	n/a	Organic compounds	Organic oxygen compounds	Organooxygen compounds
validamine7-phosphate	C21216	n/a	Organic compounds	Organic oxygen compounds	Organooxygen compounds
validoxylaminea7'-phosphate	C21219	VDO	Organic compounds	Organic oxygen compounds	Organooxygen compounds	Biologically significant ligand;
xylitol	C00379	n/a	Organic compounds	Organic oxygen compounds	Organooxygen compounds
1,1,1-trichloroethane	C18246	n/a	Organic compounds	Organohalogen compounds	Organochlorides
1,2-dibromoethane	C11088	n/a	Organic compounds	Organohalogen compounds	Organobromides
1,2-dichloroethane	C06752	DCE	Organic compounds	Organohalogen compounds	Organochlorides	Biologically significant ligand;
1,3,4,6-tetrachloro-1,4-cyclohexadiene	C06597	n/a	Organic compounds	Organohalogen compounds	Vinyl halides
2,2-dichloroacetaldehyde	C14858	n/a	Organic compounds	Organohalogen compounds	Organochlorides
2,4,5-trichloro-2,5-cyclohexadiene-1-ol	C06598	n/a	Organic compounds	Organohalogen compounds	Halohydrins
2,5-dichloro-2,5-cyclohexadiene-1,4-diol	C06599	n/a	Organic compounds	Organohalogen compounds	Halohydrins
2-bromoacetaldehyde	C14870	n/a	Organic compounds	Organohalogen compounds	Organobromides
2-chloroethanol	C06753	n/a	Organic compounds	Organohalogen compounds	Halohydrins
beta-1,2,3,4,5,6-hexachlorocyclohexane	C06988	n/a	Organic compounds	Organohalogen compounds	Alkyl halides
bromobenzene-2,3-dihydrodiol	C14842	n/a	Organic compounds	Organohalogen compounds	Halohydrins
bromochloromethane	C02661	n/a	Organic compounds	Organohalogen compounds	Alkyl halides
chloral	C14866	CLX	Organic compounds	Organohalogen compounds	Organochlorides
chloralhydrate	C06899	n/a	Organic compounds	Organohalogen compounds	Halohydrins
chloroacetaldehyde	C06754	n/a	Organic compounds	Organohalogen compounds	Organochlorides
chloroacetylchloride	C14859	n/a	Organic compounds	Organohalogen compounds	Acyl halides
cis-1,3-dichloropropene	C06610	n/a	Organic compounds	Organohalogen compounds	Vinyl halides
cis-3-chloro-2-propene-1-ol	C06612	n/a	Organic compounds	Organohalogen compounds	Vinyl halides
trans-1,3-dichloropropene	C06609	n/a	Organic compounds	Organohalogen compounds	Vinyl halides
trans-3-chloro-2-propene-1-ol	C06611	n/a	Organic compounds	Organohalogen compounds	Vinyl halides
trichloroethanol	C07490	ETF	Organic compounds	Organohalogen compounds	Halohydrins	Biologically significant ligand;
trichloroethene	C06790	n/a	Organic compounds	Organohalogen compounds	Vinyl halides
(3s,5s)-carbapenam-3-carboxylicacid	C17367	n/a	Organic compounds	Organoheterocyclic compounds	Lactams
(6r)-10-formyltetrahydropteroyldiglutamate	C05928	n/a	Organic compounds	Organoheterocyclic compounds	Pteridines and derivatives
(7r)-7-(5-carboxy-5-oxopentanoyl)aminocephalosporinate	C04712	n/a	Organic compounds	Organoheterocyclic compounds	Lactams
(indol-3-yl)acetamide	C02693	TSR	Organic compounds	Organoheterocyclic compounds	Indoles and derivatives	Biologically significant ligand;
(r)-5,6-dihydrothymine	C21028	n/a	Organic compounds	Organoheterocyclic compounds	Diazines
(r)-lipoate	C16241	LPB	Organic compounds	Organoheterocyclic compounds	Dithiolanes
(r,s)-coclaurine	C06348	n/a	Organic compounds	Organoheterocyclic compounds	Isoquinolines and derivatives
(r,s)-norcoclaurine	C06346	n/a	Organic compounds	Organoheterocyclic compounds	Isoquinolines and derivatives
(s)-6-hydroxynicotine	C01056	HNK	Organic compounds	Organoheterocyclic compounds	Pyridines and derivatives	Biologically significant ligand;
(s)-6-o-methylnorlaudanosoline	C06517	n/a	Organic compounds	Organoheterocyclic compounds	Isoquinolines and derivatives
(s)-coclaurine	C06161	n/a	Organic compounds	Organoheterocyclic compounds	Isoquinolines and derivatives
(s)-norcoclaurine	C06160	n/a	Organic compounds	Organoheterocyclic compounds	Isoquinolines and derivatives
(s)-norlaudanosoline	C02916	2H4	Organic compounds	Organoheterocyclic compounds	Isoquinolines and derivatives	Biologically significant ligand;
[heparansulfate]-glucosamine3-sulfate	C11553	n/a	Organic compounds	Organoheterocyclic compounds	Tetrapyrroles and derivatives
1-(methylnitrosoamino)-4-(3-pyridinyl)-1,4-butanediol	C19577	n/a	Organic compounds	Organoheterocyclic compounds	Pyridines and derivatives
1,1-dichloroethyleneepoxide	C14857	n/a	Organic compounds	Organoheterocyclic compounds	Epoxides
1,3,7-trimethylxanthine	C07481	CFF	Organic compounds	Organoheterocyclic compounds	Imidazopyrimidines
1,3-dihydroxy-n-methylacridone	C12093	n/a	Organic compounds	Organoheterocyclic compounds	Quinolines and derivatives
1,4'-bipiperidine-1'-carboxylicacid	C16836	n/a	Organic compounds	Organoheterocyclic compounds	Piperidines
1,5-anhydro-d-fructose	C06485	NHF	Organic compounds	Organoheterocyclic compounds	Oxanes
1,7-dimethyluricacid	C16356	n/a	Organic compounds	Organoheterocyclic compounds	Imidazopyrimidines
1,7-dimethylxanthine	C13747	n/a	Organic compounds	Organoheterocyclic compounds	Imidazopyrimidines
10-formyltetrahydrofolate	C00234	1YA	Organic compounds	Organoheterocyclic compounds	Pteridines and derivatives
1-alkyl-sn-glycero-3-phosphate	C03968	n/a	Organic compounds	Organoheterocyclic compounds	Quinolines and derivatives
1-alkyl-sn-glycero-3-phosphocholine	C04317	n/a	Organic compounds	Organoheterocyclic compounds	Pyridines and derivatives
1-hydroxyphenazine	C21477	n/a	Organic compounds	Organoheterocyclic compounds	Diazanaphthalenes
1-methyl-4-phenyl-1,2,3,6-tetrahydropyridine	C04599	n/a	Organic compounds	Organoheterocyclic compounds	Pyridines and derivatives
1-methyl-4-phenyl-1,2,3,6-tetrahydropyridinen-oxide	C04731	n/a	Organic compounds	Organoheterocyclic compounds	Pyridines and derivatives
1-methylnicotinamide	C02918	n/a	Organic compounds	Organoheterocyclic compounds	Pyridines and derivatives
1-methylxanthine	C16358	n/a	Organic compounds	Organoheterocyclic compounds	Imidazopyrimidines
1-o-(2-amino-2-deoxy-alpha-d-glucopyranosyl)-1d-myo-inositol	C19702	n/a	Organic compounds	Organoheterocyclic compounds	n/a
1-o-[2-(l-cysteinamido)-2-deoxy-alpha-d-glucopyranosyl]-1d-myo-inositol	C19703	n/a	Organic compounds	Organoheterocyclic compounds	n/a
1-pyrroline	C15668	n/a	Organic compounds	Organoheterocyclic compounds	Pyrrolines
1-pyrroline-2-carboxylate	C03564	n/a	Organic compounds	Organoheterocyclic compounds	Pyrrolines
1-pyrroline-4-hydroxy-2-carboxylate	C04282	n/a	Organic compounds	Organoheterocyclic compounds	Pyrrolines
2-(alpha-hydroxyethyl)thiaminediphosphate	C05125	TDW	Organic compounds	Organoheterocyclic compounds	Diazines	Biologically significant ligand;
2-(alpha-hydroxypropyl)thiaminediphosphate	C21017	n/a	Organic compounds	Organoheterocyclic compounds	Diazines
2,3,6-trihydroxypyridine	C03458	n/a	Organic compounds	Organoheterocyclic compounds	Pyridines and derivatives
2,5-dichloro-carboxymethylenebut-2-en-4-olide	C12834	n/a	Organic compounds	Organoheterocyclic compounds	Dihydrofurans
2,5-dihydroxypyridine	C01059	n/a	Organic compounds	Organoheterocyclic compounds	Pyridines and derivatives
2,5-furandicarboxylate	C20450	n/a	Organic compounds	Organoheterocyclic compounds	Furans
2,6-dihydroxypyridine	C03056	n/a	Organic compounds	Organoheterocyclic compounds	Pyridines and derivatives
2-chloro-5-methyl-cis-dienelactone	C18304	n/a	Organic compounds	Organoheterocyclic compounds	Dihydrofurans
2-heptyl-4-quinolone	C20643	n/a	Organic compounds	Organoheterocyclic compounds	Quinolines and derivatives
2-imino-3-(7-chloroindol-3-yl)propanoate	C19688	n/a	Organic compounds	Organoheterocyclic compounds	Indoles and derivatives
2-methyl-1-hydroxybutyl-thpp	C15978	THY	Organic compounds	Organoheterocyclic compounds	Diazines	Biologically significant ligand;
2-methyl-1-hydroxypropyl-thpp	C15976	THV	Organic compounds	Organoheterocyclic compounds	Diazines	Biologically significant ligand;
2-methylquinoline-3,4-diol	C06331	n/a	Organic compounds	Organoheterocyclic compounds	Quinolines and derivatives
2-pyrone-4,6-dicarboxylate	C03671	n/a	Organic compounds	Organoheterocyclic compounds	Pyrans
3,7-dimethylxanthine	C07480	37T	Organic compounds	Organoheterocyclic compounds	Imidazopyrimidines	Biologically significant ligand;
3-carboxy-1-hydroxypropyl-thpp	C05381	TD5	Organic compounds	Organoheterocyclic compounds	Diazines
3-hydroxy-1h-quinolin-4-one	C11503	n/a	Organic compounds	Organoheterocyclic compounds	Quinolines and derivatives
3-hydroxy-2-methyl-1h-quinolin-4-one	C11504	HQD	Organic compounds	Organoheterocyclic compounds	Quinolines and derivatives	Biologically significant ligand;
3-methyl-1-hydroxybutyl-thpp	C15974	WWF	Organic compounds	Organoheterocyclic compounds	Diazines	Biologically significant ligand;
4-(methylnitrosamino)-1-(3-pyridyl)-1-butanol	C19574	n/a	Organic compounds	Organoheterocyclic compounds	Pyridines and derivatives
4,6-dihydroxyquinoline	C05639	n/a	Organic compounds	Organoheterocyclic compounds	Quinolines and derivatives
4,8-dihydroxyquinoline	C05637	n/a	Organic compounds	Organoheterocyclic compounds	Quinolines and derivatives
4-amino-2-methyl-5-(phosphooxymethyl)pyrimidine	C04556	n/a	Organic compounds	Organoheterocyclic compounds	Diazines
4-amino-5-hydroxymethyl-2-methylpyrimidine	C01279	HMH	Organic compounds	Organoheterocyclic compounds	Diazines	Biologically significant ligand;
4-carboxymethylenebut-2-en-4-olide	C04431	n/a	Organic compounds	Organoheterocyclic compounds	Dihydrofurans
4-fluoromuconolactone	C16476	n/a	Organic compounds	Organoheterocyclic compounds	Dihydrofurans
4-hydroxy-2,5-dimethylfuran-3(2h)-one	C20717	1XX	Organic compounds	Organoheterocyclic compounds	Dihydrofurans	Biologically significant ligand;
4-hydroxy-5-methyl-2-methylenefuran-3(2h)-one	C20718	n/a	Organic compounds	Organoheterocyclic compounds	Dihydrofurans
4-imidazolone-5-propanoate	C03680	n/a	Organic compounds	Organoheterocyclic compounds	Azoles
4-methyl-5-(2-phosphooxyethyl)thiazole	C04327	TZP	Organic compounds	Organoheterocyclic compounds	Azoles	Biologically significant ligand;
4'-o-demethylrebeccamycin	C19700	n/a	Organic compounds	Organoheterocyclic compounds	Indoles and derivatives
4-pyridoxolactone	C00971	4PL	Organic compounds	Organoheterocyclic compounds	Pyridines and derivatives	Biologically significant ligand;
5-(2-hydroxyethyl)-4-methylthiazole	C04294	TZE	Organic compounds	Organoheterocyclic compounds	Azoles	Biologically significant ligand;
5-(dihydroxymethyl)furan-2-carbaldehyde	C20900	n/a	Organic compounds	Organoheterocyclic compounds	Furans
5-(dihydroxymethyl)furan-2-carboxylate	C20901	n/a	Organic compounds	Organoheterocyclic compounds	Furans
5-(n-methyl-4,5-dihydro-1h-pyrrol-2-yl)pyridin-2-ol	C21075	HNH	Organic compounds	Organoheterocyclic compounds	Pyridines and derivatives	Biologically significant ligand;
5,10-methenyltetrahydrofolate	C00445	n/a	Organic compounds	Organoheterocyclic compounds	Pteridines and derivatives
5,10-methylenetetrahydrofolate	C00143	n/a	Organic compounds	Organoheterocyclic compounds	Pteridines and derivatives	UniProt cofactor
5,6,7,8-tetrahydropteridine	C05650	n/a	Organic compounds	Organoheterocyclic compounds	Pteridines and derivatives
5,6-dihydro-5-fluorouracil	C16630	n/a	Organic compounds	Organoheterocyclic compounds	Diazines
5,6-dihydrouracil	C00429	n/a	Organic compounds	Organoheterocyclic compounds	Diazines
5,7-dihydroxy-2-methyl-4h-chromen-4-one	C20462	n/a	Organic compounds	Organoheterocyclic compounds	Benzopyrans
5-amino-4-imidazolecarboxyamide	C04051	n/a	Organic compounds	Organoheterocyclic compounds	Azoles
5-fluoromuconolactone	C16477	n/a	Organic compounds	Organoheterocyclic compounds	Dihydrofurans
5-formyl-2-furoate	C20449	n/a	Organic compounds	Organoheterocyclic compounds	Furans
5-FU	C07649	URB	Organic compounds	Organoheterocyclic compounds	Diazines	Biologically significant ligand;
5-hydroxyindoleacetaldehyde	C05634	n/a	Organic compounds	Organoheterocyclic compounds	Indoles and derivatives
5-hydroxyindoleacetate	C05635	n/a	Organic compounds	Organoheterocyclic compounds	Indoles and derivatives
5-hydroxyindolepyruvate	C05646	n/a	Organic compounds	Organoheterocyclic compounds	Indoles and derivatives
5-hydroxyisourate	C11821	n/a	Organic compounds	Organoheterocyclic compounds	Imidazopyrimidines
5-hydroxy-l-tryptophan	C00643	HRP	Organic compounds	Organoheterocyclic compounds	Indoles and derivatives
5-methoxyindoleacetate	C05660	n/a	Organic compounds	Organoheterocyclic compounds	Indoles and derivatives
5-methylphenazine-1-carboxylate	C21295	n/a	Organic compounds	Organoheterocyclic compounds	Diazanaphthalenes
5-methyltetrahydrofolate	C00440	C2F	Organic compounds	Organoheterocyclic compounds	Pteridines and derivatives
5-methyltetrahydropteroyltri-l-glutamate	C04489	n/a	Organic compounds	Organoheterocyclic compounds	Pteridines and derivatives
6-(1'-hydroxy-2'-oxopropyl)-tetrahydropterin	C21640	n/a	Organic compounds	Organoheterocyclic compounds	Pteridines and derivatives
6,7-dimethyl-8-(1-D-ribityl)lumazine	n/a	n/a	Organic compounds	Organoheterocyclic compounds	Pteridines and derivatives	UniProt cofactor
6,7-dimethyl-8-(d-ribityl)lumazine	C04332	DLZ	Organic compounds	Organoheterocyclic compounds	Pteridines and derivatives	Biologically significant ligand;
6-demethylmitomycina	C21163	n/a	Organic compounds	Organoheterocyclic compounds	Indoles and derivatives
6-hydroxymelatonin	C05643	n/a	Organic compounds	Organoheterocyclic compounds	Indoles and derivatives
6-hydroxynicotinate	C01020	n/a	Organic compounds	Organoheterocyclic compounds	Pyridines and derivatives
6-lactoyl-5,6,7,8-tetrahydropterin	C04244	n/a	Organic compounds	Organoheterocyclic compounds	Pteridines and derivatives
6-mercaptopurine	C02380	n/a	Organic compounds	Organoheterocyclic compounds	Imidazopyrimidines
6-methoxy-3-methyl-2-all-trans-polyprenyl-1,4-benzoquinol	C19859	n/a	Organic compounds	Organoheterocyclic compounds	Pyrans
6-methylmercaptopurine	C16614	n/a	Organic compounds	Organoheterocyclic compounds	Imidazopyrimidines
6-o-methylnorlaudanosoline	C05203	n/a	Organic compounds	Organoheterocyclic compounds	Isoquinolines and derivatives
6-pyruvoyl-5,6,7,8-tetrahydropterin	C03684	n/a	Organic compounds	Organoheterocyclic compounds	Pteridines and derivatives
7,12-dimethylbenz[a]anthracene5,6-oxide	C19604	n/a	Organic compounds	Organoheterocyclic compounds	Benzoxepines
7,8-didemethyl-8-hydroxy-5-deazariboflavin	C19154	FO1	Organic compounds	Organoheterocyclic compounds	Quinolines and derivatives	Biologically significant ligand;
7,8-dihydroneopterin	C04874	n/a	Organic compounds	Organoheterocyclic compounds	Pteridines and derivatives
7,8-dihydroneopterin3'-triphosphate	C04895	n/a	Organic compounds	Organoheterocyclic compounds	Pteridines and derivatives
7,8-dihydropteroate	C00921	n/a	Organic compounds	Organoheterocyclic compounds	Pteridines and derivatives
7-carboxy-7-carbaguanine	C20248	n/a	Organic compounds	Organoheterocyclic compounds	Pyrrolopyrimidines
7-chloro-l-tryptophan	C19687	CTE	Organic compounds	Organoheterocyclic compounds	Indoles and derivatives	Biologically significant ligand;
7-cyano-7-carbaguanine	C15996	n/a	Organic compounds	Organoheterocyclic compounds	Pyrrolopyrimidines
7-demethylmitomycinb	C21164	n/a	Organic compounds	Organoheterocyclic compounds	Indoles and derivatives
7-methylxanthine	C16353	n/a	Organic compounds	Organoheterocyclic compounds	Imidazopyrimidines
adenine	C00147	ADE	Organic compounds	Organoheterocyclic compounds	Imidazopyrimidines	Biologically significant ligand;
adenosylcob(iii)yrinicacida,c-diamide	C06506	n/a	Organic compounds	Organoheterocyclic compounds	Tetrapyrroles and derivatives
adenosylcobinamide	C06508	n/a	Organic compounds	Organoheterocyclic compounds	Tetrapyrroles and derivatives
adenosylcobinamidephosphate	C06509	n/a	Organic compounds	Organoheterocyclic compounds	Tetrapyrroles and derivatives
alpha-[3-[(hydroxymethyl)nitrosoamino]propyl]-3-pyridinemethanol	C19580	n/a	Organic compounds	Organoheterocyclic compounds	Pyridines and derivatives
aquacob(iii)alamin	C00992	n/a	Organic compounds	Organoheterocyclic compounds	Tetrapyrroles and derivatives
Ascorbic_acid	C00072	n/a	Organic compounds	Organoheterocyclic compounds	Dihydrofurans
bacteriochlorophyllidec	C18161	n/a	Organic compounds	Organoheterocyclic compounds	Tetrapyrroles and derivatives
bacteriochlorophyllided	C18160	n/a	Organic compounds	Organoheterocyclic compounds	Naphthopyrans
beta-lactam	C01866	n/a	Organic compounds	Organoheterocyclic compounds	Oxepanes
bilirubin	C00486	n/a	Organic compounds	Organoheterocyclic compounds	Tetrapyrroles and derivatives
bilirubinbeta-diglucuronide	C05787	n/a	Organic compounds	Organoheterocyclic compounds	Tetrapyrroles and derivatives
biliverdin	C00500	n/a	Organic compounds	Organoheterocyclic compounds	Tetrapyrroles and derivatives
biopterin	C06313	BIO	Organic compounds	Organoheterocyclic compounds	Pteridines and derivatives
biotin	C00120	BTN	Organic compounds	Organoheterocyclic compounds	Biotin and derivatives	UniProt cofactor
bromobenzene-2,3-oxide	C14840	n/a	Organic compounds	Organoheterocyclic compounds	Epoxides
bromobenzene-3,4-oxide	C14839	n/a	Organic compounds	Organoheterocyclic compounds	Epoxides
bufotenine	C08299	n/a	Organic compounds	Organoheterocyclic compounds	Indoles and derivatives
c-13(2)-carboxypyropheophorbidea	C18063	n/a	Organic compounds	Organoheterocyclic compounds	Tetrapyrroles and derivatives
carbamazepine	C06868	n/a	Organic compounds	Organoheterocyclic compounds	Benzazepines
carbamazepine-10,11-epoxide	C07496	n/a	Organic compounds	Organoheterocyclic compounds	Benzazepines
cdp-diacylglycerol	C00269	n/a	Organic compounds	Organoheterocyclic compounds	Pyridines and derivatives
chlorophyllide	C02139	n/a	Organic compounds	Organoheterocyclic compounds	Tetrapyrroles and derivatives
cinnavalininate	C05640	n/a	Organic compounds	Organoheterocyclic compounds	Benzoxazines
cis-2-chloro-4-carboxymethylenebut-2-en-1,4-olide	C04706	n/a	Organic compounds	Organoheterocyclic compounds	Dihydrofurans
citalopramaldehyde	C16612	n/a	Organic compounds	Organoheterocyclic compounds	Isocoumarans
cob(i)alamin	C00853	B12	Organic compounds	Organoheterocyclic compounds	Tetrapyrroles and derivatives	Biologically significant ligand;
cob(i)yrinicacida,c-diamide	C06505	n/a	Organic compounds	Organoheterocyclic compounds	Tetrapyrroles and derivatives
cob(ii)alamin	C00541	n/a	Organic compounds	Organoheterocyclic compounds	Tetrapyrroles and derivatives	UniProt cofactor
cobalt-dihydro-precorrin6	C11543	n/a	Organic compounds	Organoheterocyclic compounds	Tetrapyrroles and derivatives
cobalt-precorrin4	C11540	n/a	Organic compounds	Organoheterocyclic compounds	Tetrapyrroles and derivatives
cobalt-precorrin5a	C16242	n/a	Organic compounds	Organoheterocyclic compounds	Tetrapyrroles and derivatives
cobalt-precorrin5b	C16243	n/a	Organic compounds	Organoheterocyclic compounds	Tetrapyrroles and derivatives
cobalt-precorrin6	C11542	n/a	Organic compounds	Organoheterocyclic compounds	Tetrapyrroles and derivatives
cobalt-precorrin7	C16244	n/a	Organic compounds	Organoheterocyclic compounds	Tetrapyrroles and derivatives
cobalt-precorrin-8	C11545	n/a	Organic compounds	Organoheterocyclic compounds	Tetrapyrroles and derivatives
cobalt-sirohydrochlorin	C11538	n/a	Organic compounds	Organoheterocyclic compounds	Tetrapyrroles and derivatives
cobamidecoenzyme	C00194	n/a	Organic compounds	Organoheterocyclic compounds	Tetrapyrroles and derivatives	UniProt cofactor
cobinamide	C05774	n/a	Organic compounds	Organoheterocyclic compounds	Tetrapyrroles and derivatives
cobyrinate	C05773	n/a	Organic compounds	Organoheterocyclic compounds	Tetrapyrroles and derivatives
coelenterazineh	C00982	n/a	Organic compounds	Organoheterocyclic compounds	Imidazopyrazines
coenzymef420-0	C19153	n/a	Organic compounds	Organoheterocyclic compounds	Quinolines and derivatives
cytosine	C00380	n/a	Organic compounds	Organoheterocyclic compounds	Diazines
deacetylcephalosporinc	C03112	n/a	Organic compounds	Organoheterocyclic compounds	Lactams
dehydroascorbate	C05422	n/a	Organic compounds	Organoheterocyclic compounds	Lactones
deoxyguanidinoproclavaminicacid	C06656	PCX	Organic compounds	Organoheterocyclic compounds	Lactams	Biologically significant ligand;
dethiobiotin	C01909	DTB	Organic compounds	Organoheterocyclic compounds	Azoles	Biologically significant ligand;
d-galactono-1,4-lactone	C03383	n/a	Organic compounds	Organoheterocyclic compounds	Lactones
d-glucuronolactone	C02670	n/a	Organic compounds	Organoheterocyclic compounds	Lactones
dihydrobiopterin	C00268	n/a	Organic compounds	Organoheterocyclic compounds	Pteridines and derivatives
dihydropteridine	C05649	n/a	Organic compounds	Organoheterocyclic compounds	Pteridines and derivatives
dimethylbenzimidazole	C03114	DMD	Organic compounds	Organoheterocyclic compounds	Benzimidazoles	Biologically significant ligand;
d-xylonolactone	C02266	n/a	Organic compounds	Organoheterocyclic compounds	Lactones
epoxide	C00722	n/a	Organic compounds	Organoheterocyclic compounds	Lactams
epsilon-caprolactone	C01880	ECE	Organic compounds	Organoheterocyclic compounds	Lactones	Biologically significant ligand;
ethyleneoxide	C06548	n/a	Organic compounds	Organoheterocyclic compounds	Epoxides
ferricytochrome	C00923	n/a	Organic compounds	Organoheterocyclic compounds	Tetrapyrroles and derivatives
ferricytochromeb5	C00996	n/a	Organic compounds	Organoheterocyclic compounds	Tetrapyrroles and derivatives
ferricytochromec	C00125	n/a	Organic compounds	Organoheterocyclic compounds	Tetrapyrroles and derivatives
ferricytochromec3	C02682	n/a	Organic compounds	Organoheterocyclic compounds	Tetrapyrroles and derivatives
ferrocytochrome	C00924	n/a	Organic compounds	Organoheterocyclic compounds	Tetrapyrroles and derivatives
ferrocytochromeb5	C00999	n/a	Organic compounds	Organoheterocyclic compounds	Tetrapyrroles and derivatives
ferrocytochromec	C00126	n/a	Organic compounds	Organoheterocyclic compounds	Tetrapyrroles and derivatives
ferrocytochromec3	C02684	n/a	Organic compounds	Organoheterocyclic compounds	Tetrapyrroles and derivatives
fireflyoxyluciferin	C03797	OLU	Organic compounds	Organoheterocyclic compounds	Benzothiazoles	Biologically significant ligand;
guanidinoproclavaminicacid	C06657	n/a	Organic compounds	Organoheterocyclic compounds	Lactams
guanine	C00242	GUN	Organic compounds	Organoheterocyclic compounds	Imidazopyrimidines	Biologically significant ligand;
Heme	C00032	HEM	Organic compounds	Organoheterocyclic compounds	Tetrapyrroles and derivatives	Biologically significant ligand; UniProt cofactor
heteropyrithiamine	C02691	n/a	Organic compounds	Organoheterocyclic compounds	Diazines
hydrogenobyrinate	C06399	n/a	Organic compounds	Organoheterocyclic compounds	Tetrapyrroles and derivatives
hydroxymethylbilane	C01024	n/a	Organic compounds	Organoheterocyclic compounds	Tetrapyrroles and derivatives
hypoxanthine	C00262	HPA	Organic compounds	Organoheterocyclic compounds	Imidazopyrimidines	Biologically significant ligand;
ifosfamide	C07047	n/a	Organic compounds	Organoheterocyclic compounds	Oxazaphosphinanes
imidazole-4-acetaldehyde	C05130	n/a	Organic compounds	Organoheterocyclic compounds	Azoles
imidazole-4-acetate	C02835	n/a	Organic compounds	Organoheterocyclic compounds	Azoles
indole	C00463	IND	Organic compounds	Organoheterocyclic compounds	Indoles and derivatives
indole-3-acetaldehyde	C00637	n/a	Organic compounds	Organoheterocyclic compounds	Indoles and derivatives
indole-3-acetate	C00954	IAC	Organic compounds	Organoheterocyclic compounds	Indoles and derivatives
indoleglycerolphosphate	C03506	n/a	Organic compounds	Organoheterocyclic compounds	Indoles and derivatives
indolepyruvate	C00331	3IO	Organic compounds	Organoheterocyclic compounds	Indoles and derivatives
isoniazid	C07054	n/a	Organic compounds	Organoheterocyclic compounds	Pyridines and derivatives
isonicotinicacid	C07446	n/a	Organic compounds	Organoheterocyclic compounds	Pyridines and derivatives
l-erythro-7,8-dihydrobiopterin	C02953	HBI	Organic compounds	Organoheterocyclic compounds	Pteridines and derivatives	Biologically significant ligand;
l-gulono-1,4-lactone	C01040	n/a	Organic compounds	Organoheterocyclic compounds	Lactones
lipoamide	C00248	n/a	Organic compounds	Organoheterocyclic compounds	Dithiolanes
l-threo-7,8-dihydrobiopterin	C20263	n/a	Organic compounds	Organoheterocyclic compounds	Pteridines and derivatives
l-threo-tetrahydrobiopterin	C20264	H4B	Organic compounds	Organoheterocyclic compounds	Pteridines and derivatives
magnesiumprotoporphyrin	C03516	n/a	Organic compounds	Organoheterocyclic compounds	Tetrapyrroles and derivatives
magnesiumprotoporphyrinix13-methylester	C04536	n/a	Organic compounds	Organoheterocyclic compounds	Tetrapyrroles and derivatives
melatonin	C01598	ML1	Organic compounds	Organoheterocyclic compounds	Indoles and derivatives
methyl(indol-3-yl)acetate	C20635	n/a	Organic compounds	Organoheterocyclic compounds	Indoles and derivatives
methylcob(III)alamin	C06453	n/a	Organic compounds	Organoheterocyclic compounds	Tetrapyrroles and derivatives	UniProt cofactor
methylimidazoleacetaldehyde	C05827	n/a	Organic compounds	Organoheterocyclic compounds	Azoles
methylimidazoleaceticacid	C05828	n/a	Organic compounds	Organoheterocyclic compounds	Azoles
mitomycina	C21161	MQA	Organic compounds	Organoheterocyclic compounds	Indoles and derivatives	Biologically significant ligand;
mitomycinb	C21162	n/a	Organic compounds	Organoheterocyclic compounds	Indoles and derivatives
Molybdenum_cofactor	C18237	n/a	Organic compounds	Organoheterocyclic compounds	Pteridines and derivatives
molybdopterin	C05924	n/a	Organic compounds	Organoheterocyclic compounds	Pteridines and derivatives
monodehydroascorbate	C01041	ISD	Organic compounds	Organoheterocyclic compounds	Dihydrofurans	Biologically significant ligand;
myo-inositolphosphate	C15585	n/a	Organic compounds	Organoheterocyclic compounds	n/a
n-acetylisoniazid	C07585	n/a	Organic compounds	Organoheterocyclic compounds	Pyridines and derivatives
n-acetylserotonin	C00978	ASE	Organic compounds	Organoheterocyclic compounds	Indoles and derivatives	Biologically significant ligand;
nicotinamide	C00153	NCA	Organic compounds	Organoheterocyclic compounds	Pyridines and derivatives	Biologically significant ligand;
Nicotinic_acid	C00253	NIO	Organic compounds	Organoheterocyclic compounds	Pyridines and derivatives	Biologically significant ligand;
n-methylserotonin	C06212	n/a	Organic compounds	Organoheterocyclic compounds	Indoles and derivatives
n-methyltryptamine	C06213	n/a	Organic compounds	Organoheterocyclic compounds	Indoles and derivatives
o-1-alk-1-enyl-2-acyl-sn-glycero-3-phosphoethanolamine	C04756	n/a	Organic compounds	Organoheterocyclic compounds	Diazines
orotate	C00295	ORO	Organic compounds	Organoheterocyclic compounds	Diazines	Biologically significant ligand;
phenazine-1-carboxylate	C21442	n/a	Organic compounds	Organoheterocyclic compounds	Diazanaphthalenes
pheophorbidea	C18021	n/a	Organic compounds	Organoheterocyclic compounds	Tetrapyrroles and derivatives
poly-beta-hydroxybutyrate	C06143	n/a	Organic compounds	Organoheterocyclic compounds	Tetrahydroisoquinolines
precorrin1	C15527	n/a	Organic compounds	Organoheterocyclic compounds	Tetrapyrroles and derivatives
precorrin2	C02463	n/a	Organic compounds	Organoheterocyclic compounds	Tetrapyrroles and derivatives
precorrin3a	C05772	n/a	Organic compounds	Organoheterocyclic compounds	Tetrapyrroles and derivatives
precorrin4	C06407	n/a	Organic compounds	Organoheterocyclic compounds	Tetrapyrroles and derivatives
precorrin5	C06416	n/a	Organic compounds	Organoheterocyclic compounds	Tetrapyrroles and derivatives
precorrin6b	C06319	n/a	Organic compounds	Organoheterocyclic compounds	Tetrapyrroles and derivatives
precorrin6x	C06320	n/a	Organic compounds	Organoheterocyclic compounds	Tetrapyrroles and derivatives
precorrin8x	C06408	n/a	Organic compounds	Organoheterocyclic compounds	Tetrapyrroles and derivatives
proclavaminicacid	C06658	n/a	Organic compounds	Organoheterocyclic compounds	Lactams
protoanemonin	C07090	n/a	Organic compounds	Organoheterocyclic compounds	Dihydrofurans
protochlorophyllidea	C02880	n/a	Organic compounds	Organoheterocyclic compounds	Tetrapyrroles and derivatives
protodeoxyviolaceinicacid	C21131	n/a	Organic compounds	Organoheterocyclic compounds	Indoles and derivatives
protoporphyrin	C02191	n/a	Organic compounds	Organoheterocyclic compounds	Tetrapyrroles and derivatives
protoporphyrinogenix	C01079	n/a	Organic compounds	Organoheterocyclic compounds	Tetrapyrroles and derivatives
protoviolaceinicacid	C21134	n/a	Organic compounds	Organoheterocyclic compounds	Indoles and derivatives
purine	C15587	n/a	Organic compounds	Organoheterocyclic compounds	Imidazopyrimidines
pyocyanin	C01748	n/a	Organic compounds	Organoheterocyclic compounds	Diazanaphthalenes
pyridine	C00747	n/a	Organic compounds	Organoheterocyclic compounds	Pyridines and derivatives
pyridine-2,3-dicarboxylate	C03722	NTM	Organic compounds	Organoheterocyclic compounds	Pyridines and derivatives	Biologically significant ligand;
pyridoxal	C00250	PXL	Organic compounds	Organoheterocyclic compounds	Pyridines and derivatives	Biologically significant ligand;
pyridoxal5'-phosphate	C00018	PLP	Organic compounds	Organoheterocyclic compounds	Pyridines and derivatives	Biologically significant ligand; UniProt cofactor
Pyridoxamine	C00534	PXM	Organic compounds	Organoheterocyclic compounds	Pyridines and derivatives	Biologically significant ligand;
pyridoxaminephosphate	C00647	PMP	Organic compounds	Organoheterocyclic compounds	Pyridines and derivatives
Pyridoxine	C00314	UEG	Organic compounds	Organoheterocyclic compounds	Pyridines and derivatives
pyridoxinephosphate	C00627	n/a	Organic compounds	Organoheterocyclic compounds	Pyridines and derivatives
pyrimidinebase	C00396	n/a	Organic compounds	Organoheterocyclic compounds	Diazines
pyropheophorbidea	C18064	n/a	Organic compounds	Organoheterocyclic compounds	Tetrapyrroles and derivatives
quinoline-3,4-diol	C06330	n/a	Organic compounds	Organoheterocyclic compounds	Quinolines and derivatives
rebeccamycin	C19701	n/a	Organic compounds	Organoheterocyclic compounds	Indoles and derivatives
reducedriboflavin	C01007	n/a	Organic compounds	Organoheterocyclic compounds	Pteridines and derivatives
reducedvitamink	C05850	n/a	Organic compounds	Organoheterocyclic compounds	Pteridines and derivatives
Riboflavin	C00255	RBF	Organic compounds	Organoheterocyclic compounds	Pteridines and derivatives
s-alkyl-l-cysteines-oxide	C03726	n/a	Organic compounds	Organoheterocyclic compounds	Triazines
sepiapterin	C00835	n/a	Organic compounds	Organoheterocyclic compounds	Pteridines and derivatives
serotonin	C00780	SRO	Organic compounds	Organoheterocyclic compounds	Indoles and derivatives
siroheme	C00748	n/a	Organic compounds	Organoheterocyclic compounds	Tetrapyrroles and derivatives
sirohydrochlorin	C05778	n/a	Organic compounds	Organoheterocyclic compounds	Tetrapyrroles and derivatives
s-palmitoylprotein	C17202	n/a	Organic compounds	Organoheterocyclic compounds	Indoles and derivatives
sterol	C00370	n/a	Organic compounds	Organoheterocyclic compounds	Benzimidazoles
tceepoxide	C11148	n/a	Organic compounds	Organoheterocyclic compounds	Epoxides
tegafur	C12673	n/a	Organic compounds	Organoheterocyclic compounds	Diazines
testololactone	C04676	n/a	Organic compounds	Organoheterocyclic compounds	Naphthopyrans
tetrahydrobiopterin	C00272	n/a	Organic compounds	Organoheterocyclic compounds	Pteridines and derivatives	Biologically significant ligand; UniProt cofactor
tetrahydrofolate	C00101	1YJ	Organic compounds	Organoheterocyclic compounds	Pteridines and derivatives	Biologically significant ligand;
tetrahydropapaveroline	C06350	n/a	Organic compounds	Organoheterocyclic compounds	Isoquinolines and derivatives
tetrahydropteroyl-[gamma-glu]n1	C03541	n/a	Organic compounds	Organoheterocyclic compounds	Indoles and derivatives
tetrahydropteroyltri-l-glutamate	C04144	n/a	Organic compounds	Organoheterocyclic compounds	Pteridines and derivatives
thf-l-glutamate	C09332	n/a	Organic compounds	Organoheterocyclic compounds	Pteridines and derivatives
Thiamine	C00378	VIB	Organic compounds	Organoheterocyclic compounds	Diazines	Biologically significant ligand;
thiaminediphosphate	C00068	TDP	Organic compounds	Organoheterocyclic compounds	Diazines	Biologically significant ligand; UniProt cofactor
thiaminmonophosphate	C01081	TPS	Organic compounds	Organoheterocyclic compounds	Diazines
thiamintriphosphate	C03028	n/a	Organic compounds	Organoheterocyclic compounds	Diazines
thioguanine	C07648	n/a	Organic compounds	Organoheterocyclic compounds	Imidazopyrimidines
thiopurine	C01756	n/a	Organic compounds	Organoheterocyclic compounds	Imidazopyrimidines
thymine	C00178	TDR	Organic compounds	Organoheterocyclic compounds	Diazines	Biologically significant ligand;
trans-4-carboxymethylenebut-2-en-4-olide	C12838	n/a	Organic compounds	Organoheterocyclic compounds	Dihydrofurans
triacylglycerol	C00422	n/a	Organic compounds	Organoheterocyclic compounds	Azoles
tryptamine	C00398	n/a	Organic compounds	Organoheterocyclic compounds	Indoles and derivatives
tryptophan	C00078	TRP	Organic compounds	Organoheterocyclic compounds	Indoles and derivatives	Biologically significant ligand;
uracil	C00106	URA	Organic compounds	Organoheterocyclic compounds	Diazines	Biologically significant ligand;
Urate	C00366	URC	Organic compounds	Organoheterocyclic compounds	Imidazopyrimidines	Biologically significant ligand;
urocanate	C00785	URO	Organic compounds	Organoheterocyclic compounds	Azoles	Biologically significant ligand;
uroporphyriniii	C02469	n/a	Organic compounds	Organoheterocyclic compounds	Tetrapyrroles and derivatives
uroporphyrinogeniii	C01051	n/a	Organic compounds	Organoheterocyclic compounds	Tetrapyrroles and derivatives
vitaminb12	C05776	n/a	Organic compounds	Organoheterocyclic compounds	Tetrapyrroles and derivatives
xanthine	C00385	XAN	Organic compounds	Organoheterocyclic compounds	Imidazopyrimidines	Biologically significant ligand;
dimethylselenide	C02535	n/a	Organic compounds	Organometallic compounds	Organometalloid compounds
methaneselenol	C05703	MMC	Organic compounds	Organometallic compounds	Organometalloid compounds
trimethylselenonium	C18872	n/a	Organic compounds	Organometallic compounds	Organometalloid compounds
carbonylsulfide	C07331	n/a	Organic compounds	Organosulfur compounds	n/a
dimethylsulfide	C00580	n/a	Organic compounds	Organosulfur compounds	Thioethers
dimethylsulfoxide	C11143	DMS	Organic compounds	Organosulfur compounds	Sulfoxides	Biologically significant ligand;
methanethiol	C00409	MEE	Organic compounds	Organosulfur compounds	Thiols	Biologically significant ligand;
[truncated: 469 more rows]
